1 **Title: Fine tuning of hormonal signaling is linked to dormancy status in sweet cherry flower**  
2 **buds**

3 **Running head: ABA and GA signaling predicted to control sweet cherry bud dormancy**

4 Noémie Vimont<sup>1,2,3</sup>, Adrian Schwarzenberg<sup>2</sup>, Mirela Domijan<sup>4</sup>, Armel S. L. Donkpegan<sup>1</sup>, Rémi  
5 Beauvieux<sup>1</sup>, Loïck le Dantec<sup>1</sup>, Mustapha Arkoun<sup>2</sup>, Frank Jamois<sup>2</sup>, Jean-Claude Yvin<sup>2</sup>, Philip A.  
6 Wigge<sup>5</sup>, Elisabeth Dirlewanger<sup>1</sup>, Sandra Cortijo<sup>3</sup>, Bénédicte Wenden<sup>1</sup>

7 <sup>1</sup>Univ. Bordeaux, INRAE, Biologie du Fruit et Pathologie, UMR 1332, F-33140 Villenave d'Ornon, France; <sup>2</sup>Agro  
8 Innovation International - Centre Mondial d'Innovation - Groupe Roullier, 35400 St Malo, France; <sup>3</sup>The Sainsbury  
9 Laboratory, University of Cambridge, Cambridge CB2 1LR, United Kingdom; <sup>4</sup>Dept. of Mathematical Sciences, University  
10 of Liverpool, Liverpool L69 7ZL, United Kingdom; <sup>5</sup>Leibniz-Institute für Gemüse- und Zierpflanzenbau (IGZ), Plant  
11 Adaptation, Grossbeeren, Germany

12 **Author for correspondence:**

13 Bénédicte Wenden  
14 INRAE UMR 1332 BFP  
15 71 avenue Edouard Bourlaux CS20032  
16 33882 Villenave d'Ornon Cedex, France  
17 Tel: +33 557122549  
18 benedicte.wenden@inrae.fr  
19

20 **ABSTRACT**

21 In temperate trees, optimal timing and quality of flowering directly depend on adequate winter dormancy  
22 progression, regulated by a combination of chilling and warm temperatures. Physiological, genetic and  
23 functional genomic studies have shown that hormones play a key role in bud dormancy establishment,  
24 maintenance and release. We combined physiological, transcriptional analyses, quantification of  
25 abscisic acid (ABA) and gibberellins (GAs), and modelling to further investigate how these signaling  
26 pathways are associated with dormancy progression in the flower buds of two sweet cherry cultivars.

27 Our results demonstrated that GA-associated pathways have distinct functions and may be differentially  
28 related with dormancy. In addition, ABA levels rise at the onset of dormancy, associated with enhanced  
29 expression of ABA biosynthesis *PavNCED* genes, and decreased prior to dormancy release. Following  
30 the observations that ABA levels are correlated with dormancy depth, we identified *PavUG71B6*, a  
31 sweet cherry *UDP-GLYCOSYLTRANSFERASE* gene that up-regulates active catabolism of ABA to  
32 ABA-GE and may be associated with low ABA content in the early cultivar. Subsequently, we modelled  
33 ABA content and dormancy behavior in three cultivars based on the expression of a small set of genes  
34 regulating ABA levels. These results strongly suggest the central role of ABA pathway in the control of  
35 dormancy progression and open up new perspectives for the development of molecular-based  
36 phenological modelling.

37 **KEY WORDS:** Abscisic acid, bud dormancy, gibberellic acid, hormones, modelling, *Prunus avium* L.

## 38 INTRODUCTION

39 Perennial plants have evolved strategies that enhance survival under the various environmental stresses  
40 they face during their growth and reproductive cycles. Among them, dormancy is a quiescent phase that  
41 protects meristematic and reproductive tissues from freezing damage. In temperate trees, the transition  
42 from active growth to dormancy is often triggered by decreasing photoperiod and/or temperatures  
43 depending on the species (Heide and Prestrud 2005, Rohde et al. 2011, Petterle et al. 2013, Singh et al.  
44 2016). Subsequently, the bud dormancy process relies on the integration of cold and warm temperatures  
45 between endodormancy, when buds are unable to resume growth even under favorable conditions, and  
46 ecodormancy, when bud development is inhibited by unfavorable conditions until optimal growth  
47 temperatures and photoperiod are met (Lang et al. 1987). In the current context of climate change,  
48 temperate trees are affected by contradictory effects during the dormancy period and shifts in  
49 phenological phases are observed: longer growing season and insufficient chilling during winter, both  
50 effects potentially having dramatic impact on growth and production (Vitasse et al. 2011, Atkinson et  
51 al. 2013, Jochner et al. 2013). Dormancy progression and control by temperature and photoperiod in  
52 perennial plants have been a focus for decades and physiological, genetic and functional genomic studies  
53 have shed some light onto the mechanisms underlying dormancy control in deciduous trees and other  
54 perennial plants (Cooke et al. 2012, Ríos et al. 2014, Beauvieux et al. 2018). Bud dormancy is controlled  
55 by a complex array of signaling pathways that integrate endogenous and environmental cues towards a  
56 rest/growth decision. Effort to synthesize the available knowledge and data into modelling approaches  
57 have led to the development of phenological models based on the dormancy regulation by temperature  
58 and photoperiod (Chuine et al. 2016, Chuine and Régnière 2017). However, process-based models of  
59 bud dormancy have not changed substantially since 1990 (Hänninen 1990) and the current predictive  
60 models rely on very little information about involved mechanisms. Conceptual models for dormancy  
61 progression have been proposed based on interactions between respiratory stresses, ethylene and  
62 abscisic acid (ABA), which in turn activate gibberellins (GA)-mediated growth through up-regulation  
63 of *FLOWERING LOCUS T (FT)* expression and resumption of intercellular transport (Ophir et al. 2009,  
64 Rinne et al. 2011).

65 The major role of hormones in the regulation of bud growth cessation, dormancy and activity resumption  
66 has been extensively discussed (e.g. Cooke et al. 2012, Beauvieux et al. 2018, Liu and Sherif 2019).  
67 Seed and bud dormancy show common features in terms of hormonal control (Powell 1987, Leida,  
68 Conejero, et al. 2012, Wang et al. 2016) and GA and ABA balance is often involved in the integration  
69 of internal and external cues to control plant growth (Rodríguez-Gacio et al. 2009, Finkelstein 2013,  
70 Shu et al. 2018): GAs promote growth, whereas ABA promotes dormancy. Multiple physiological and  
71 transcriptomic studies have indeed proposed a central role for ABA in the repression of bud activity  
72 during dormancy. ABA would function as a signal in response to autumn short days and decreasing  
73 temperatures to induce dormancy onset (Rohde et al. 2002, Rohde and Bhalerao 2007, Ruttink et al.

74 2007, Wang et al. 2016, Tuan et al. 2017, Li et al. 2018, Tylewicz et al. 2018). Strong correlation was  
75 further shown between ABA and dormancy depth with high ABA levels detected during endodormancy,  
76 followed by a decrease in endogenous ABA content during the transition from endodormancy to  
77 ecodormancy (Or et al. 2000, Zheng et al. 2015, Wang et al. 2016, Wen et al. 2016, Chmielewski et al.  
78 2017, Li et al. 2018, Zhang et al. 2018, Yamane et al. 2019). Recently, ABA content has been proposed  
79 as a determining factor to assess dormancy status in sweet cherry (Chmielewski et al. 2017) and we have  
80 shown in a previous study that genes involved in ABA-related pathways were central in the  
81 transcriptomic analysis of flower bud dormancy (Vimont et al. 2019). More precisely, recent  
82 transcriptomic analyses of genes involved in the precise balance between biosynthesis and catabolism  
83 modulating ABA levels have further defined the involvement of ABA in bud dormancy. Indeed,  
84 expression patterns for 9-cis epoxy-carotenoid dioxygenases (*NCED*), that catalyze the critical step for  
85 ABA biosynthesis, and *CYP707A*, encoding cytochrome P450 monooxygenases that inactivate ABA  
86 into 8'-hydroxy ABA, as well as ABA signaling genes, support ABA involvement in bud dormancy  
87 induction and maintenance (Fig. 1a; Nambara and Marion-Poll 2005, Bai et al. 2013, Zhong et al. 2013,  
88 Zhu et al. 2015, Wang et al. 2016, Khalil-Ur-Rehman et al. 2017, Li et al. 2018, Zhang et al. 2018,  
89 Zheng et al. 2018, Yu et al. 2020). Similarly, until recently, most of the knowledge gathered on the  
90 behavior of the GA pathway during dormancy had been obtained in seeds but reports published in the  
91 last years have shed some light on GA regulation throughout bud dormancy in perennial plants. Studies  
92 have suggested a major role for GAs in maintaining growth before the induction of dormancy (Junttila  
93 and Jensen 1988, Ruttink et al. 2007, Olsen 2010, Eriksson et al. 2015, Singh et al. 2016) and promoting  
94 growth during ecodormancy (Wen et al. 2016, Zhang et al. 2018). Interestingly, GA treatments have a  
95 controversial effect on dormancy and bud break as shown in various perennial species since GA  
96 application may substitute for chilling (Shafer and Monson 1958, Rinne et al. 2011, Zhuang et al. 2013),  
97 or have delaying effects on shoot growth and bud break (Hoad 1983, Zheng et al. 2018), suggesting  
98 distinct gibberellin functions during dormancy. Although transcriptomic results for *GA2ox*, *GA3ox* and  
99 *GA20ox* vary between studies and therefore suggest complex and distinct functions, general patterns  
100 could be identified: expression for GA biosynthesis genes *GA 20-oxidases* (*GA20ox*) and *GA 3-oxidases*  
101 (*GA3ox*) decreases during dormancy induction then increases after dormancy release and during  
102 ecodormancy while GA deactivation *GA 2-oxidases* (*GA2ox*) genes are up-regulated during  
103 endodormancy and inhibited after endodormancy is released (Fig. 1b; Yamaguchi 2008, Bai et al. 2013,  
104 Zhong et al. 2013, Zhu et al. 2015, Wen et al. 2016, Khalil-Ur-Rehman et al. 2017, Zhang et al. 2018,  
105 Zheng et al. 2018).

106 In this study we explored potential hormonal markers of dormancy using a combination of physiological  
107 and transcriptomic analyses and a new modelling approach. We have focused on the involvement of GA  
108 and ABA pathways in sweet cherry flower bud dormancy. We examined the effect of exogenous GA  
109 and ABA on dormancy status and monitored endogenous contents for GAs and ABA and its metabolites,

110 as well as the expression of genes related to ABA and GA metabolism throughout flower bud dormancy  
 111 for two cultivars with contrasted dormancy release dates. Following our findings on hormonal control  
 112 of dormancy, we propose a mathematical model that incorporates the effect of key genes on the  
 113 dynamics of ABA to estimate dormancy status.

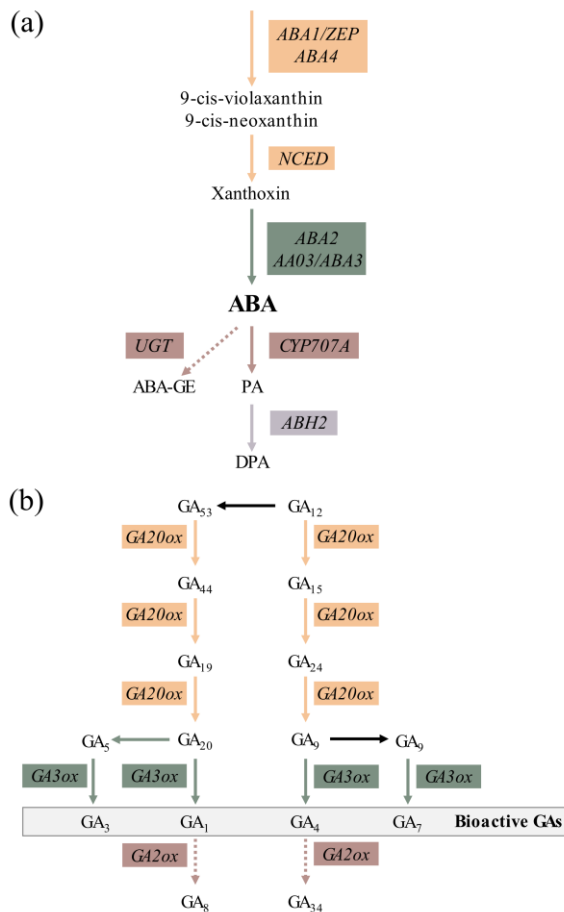

**Figure 1**

**Biosynthesis and catabolism pathway for ABA and GAs.**

(a) ABA is synthesized through the action of five enzymes: zeaxanthin epoxidase (ZEP/ABA1), ABA-deficient4 (ABA4,) 9-cis epoxy-carotenoid dioxygenase (NCED), alcohol dehydrogenase (ABA2) and short-chain dehydrogenase/reductase (AAO3/ABA3). ABA is mainly inactivated by ABA 8'-hydroxylase-catalyzed conversion to 8'-hydroxy ABA by cytochrome P450 monooxygenases, encoded by CYP707A (Nambara and Marion-Poll, 2005). 8'-hydroxy ABA is then spontaneously converted to phaseic acid (PA), which is further catabolized to dihydrophaseic acid DPA by a PA reductase (PAR) encoded by ABA HYPERSENSITIVE2 (ABH2). ABA can be conjugated with glucose to inactive ABA-glucose ester (ABA-GE) by UDP-glycosyltransferases (UGT) (Dietz et al., 2000). (b) Bioactive GAs (GA<sub>1</sub>, GA<sub>3</sub>, GA<sub>4</sub> and GA<sub>7</sub>) are synthesized by GA 20-oxidases (GA<sub>20ox</sub>) and GA 3-oxidases (GA<sub>3ox</sub>) and catabolized by GA 2-oxidases (GA<sub>2ox</sub>) (Yamaguchi, 2008). ABA: Abscisic acid; GA: Gibberellic acid.

114

115 **MATERIALS AND METHODS**

116 **Plant material**

117 As previously described (Vimont et al. 2019), samples were collected from three different sweet cherry  
 118 cultivars (*Prunus avium* L.) having very early, early and late flowering dates (respectively,  
 119 'Cristobalina', 'Garnet' and 'Regina'). Trees are grown in an orchard located at the Fruit Experimental  
 120 Unit of INRA in Bourran, South West of France (44° 19' 56" N, 0° 24' 47" E) under standard agricultural  
 121 practices. During the sampling season (July 2015 to March 2016), a mix of randomly chosen flower  
 122 buds (equivalent to a 2 mL volume) were sampled at ten time points spanning the entire period of bud  
 123 development (Fig. 2a) for phytohormone quantification (for 'Cristobalina' and 'Regina') and RNA-seq  
 124 analysis (for the three cultivars). Flower buds were harvested from branches of three ('Cristobalina' and

125 ‘Garnet’) or two different trees (‘Regina’). A total of 29, 31 and 21 samples were analyzed for  
126 ‘Cristobalina’, ‘Garnet’ and ‘Regina’ respectively. Details are available in Table S1 (Supplementary file  
127 at *Tree Physiology* online). Upon harvesting, buds were flash frozen in liquid nitrogen and stored at -  
128 80°C prior to performing RNA-seq. Average daily temperatures were recorded by an on-site weather  
129 station.

130 In addition, for the exogenous application of hormones, branches were collected from the late flowering  
131 sweet cherry cultivar ‘Fertard’. Trees were grown in an orchard located at the Fruit Experimental Unit  
132 of INRA in Toulence, South West of France (48° 51' 46" N, 2° 17' 15" E) under standard agricultural  
133 practices.

134 We calculated the chill accumulation from September 1<sup>st</sup> for each sampling date and the dates of  
135 dormancy release, using chilling hours (CH), i.e. the sum of hours when temperatures are above 0°C  
136 and below 7.2°C (Weinberger 1950), and chill portions (CP, estimated by the Dynamic model; Fishman  
137 et al. 1987a, 1987b).

#### 138 **Measurements of bud break and estimation of the dormancy release date**

139 Measurements for the dormancy stages were performed on randomly chosen branches cut every two  
140 weeks from November 16th 2015 to April 4th 2016 for ‘Cristobalina’, ‘Garnet’, ‘Regina’ and ‘Fertard’,  
141 and between November 21st 2017 and April 4th 2018 for ‘Fertard’. Branches were incubated in water  
142 pots placed in a growth chamber (25°C, 16h light/ 8h dark, 60-70% humidity). The water was replaced  
143 every 3-4 days. After ten days under these forcing conditions, the percentage of bud break, i.e. flower  
144 buds at BBCH stage 53 (Fadón et al. 2015), as illustrated in Fig. S1a (Supplementary file at *Tree*  
145 *Physiology* online), was recorded. The date of dormancy release was estimated when at least 50% of the  
146 flower buds were at the BBCH stage 53 or higher after ten days under forcing conditions.

#### 147 **Treatments with exogenous hormones and antagonists**

148 To investigate the effects of GA and ABA on dormancy, five branches per modality were randomly  
149 harvested from ten ‘Fertard’ dormant trees on January 19th 2016 and January 29th 2018 (Fig. S1). The  
150 cherry dormant buds were treated with 5 µM GA<sub>3</sub> (Sigma-Aldrich, ref. 48870), 5 µM GA<sub>4</sub> (Sigma-  
151 Aldrich, ref. G7276), 400 µM ABA (Sigma-Aldrich, ref. A1049), 300 µM paclobutrazol (Sigma-  
152 Aldrich, ref. 46046), an inhibitor of the GA pathway, and 5 µM fluridone (Sigma-Aldrich, ref. 45511),  
153 an inhibitor of the ABA pathway.

154 All chemicals and a water control were freshly prepared to the desired concentrations in 0.5% of  
155 surfactant (“Calanque”, Action Pin, Castets, France) to ensure the penetration of active molecules  
156 through the bud scales. Chemicals were sprayed on buds to runoff under a fume-hood and branches were  
157 left several minutes to allow them to dry. Branches were then transferred in the growth chamber (25°C,

158 16h light/ 8h dark, 60-70% humidity) in pots containing water. Bud break measurements were performed  
159 on flower buds as mentioned above.

160

### 161 **Phytohormones extraction**

162 For each sample (see Table S1; Supplementary file at *Tree Physiology* online), 10 mg of frozen  
163 pulverised flower buds were weighed in a 2 mL tube. The extraction was carried out as previously  
164 described (Ali et al. 2018, Haddad et al. 2018, Lakkis et al. 2019) by adding 1 mL of cold 70% MeOH/  
165 29% H<sub>2</sub>O/1.0% formic acid, containing isotopically labelled internal standards. Then, the tubes were  
166 stirred at room temperature for 30 min and centrifuged (5427R, Eppendorf) at 16,000 rpm for 20 minutes  
167 at 4°C. The supernatant of each tubes were transferred into new tubes and evaporated to dryness using  
168 a Turbovap LV system (Biotage, Sweden). The dried extracts were dissolved with 1 mL of a 2% formic  
169 acid solution. The resuspended extracts were purified using a solid phase extraction (SPE) Evolute  
170 express ABN 1ml-30 mg (Biotage, UK). The eluate was evaporated to dryness and resuspended in 200  
171 µL of 0.1% formic acid before analysis.

### 172 **Phytohormones quantification**

173 ABA and conjugates (ABA-GE, PA, DPA) and GAs (GA<sub>1</sub>, GA<sub>3</sub>, GA<sub>4</sub>, GA<sub>7</sub>) were quantified by UHPLC-  
174 MS/MS as previously described (Lakkis et al. 2019). ABA, ABA-GE, gibberellins (GA<sub>4</sub>, GA<sub>7</sub>), [<sup>2</sup>H<sub>6</sub>]-  
175 ABA, and [<sup>2</sup>H<sub>2</sub>]-GA<sub>4</sub> were purchased from OlchemIn (Olomouc, Czech Republic). DPA, PA, [<sup>2</sup>H<sub>3</sub>]-  
176 dihydrophaseic acid (D-DPA), and [<sup>2</sup>H<sub>3</sub>]-phaseic acid (D-PA) were purchased from National Research  
177 Council Canada (NRC, Saskatoon, Canada). Phytohormones were analyzed by an UHPLC-MS/MS  
178 system. The separation and detection were achieved using a Nexera X2 UHPLC system (Shimadzu,  
179 Japan) coupled to a QTrap 6500+ mass spectrometer (Sciex, Canada) equipped with an electrospray  
180 (ESI) source. Phytohormones separation was carried out by injecting 2 µL into a Kinetex Evo C18 core-  
181 shell column (100 x 2.1mm, 2.6µm, Phenomenex, USA) at a flow rate of 0.7 mL/min, and the column  
182 oven was maintained at 40°C. The mobile phases were composed of solvent A Milli-Q water (18 MΩ,  
183 Millipore, USA) containing 0.1% formic acid (LCMS grade, Fluka analytics, Germany), and solvent B  
184 acetonitrile LCMS grade (Fisher Optima, UK) containing 0.1% formic acid. The gradient elution started  
185 with 1% B, 0.0-5.0 min 60% B, 5.0-5.5 min 100% B, 5.5-7.0 min 100 % B, 7.0-7.5 min 1% B, and 7.5-  
186 9.5 min 1% B. The ionization voltage was set to 5kV for positive mode and -4.5 kV for negative mode  
187 producing mainly [M+H]<sup>+</sup> and [M-H]<sup>-</sup> respectively. The analysis was performed in scheduled multiple  
188 reaction monitoring (MRM) mode in positive and negative mode simultaneously with a polarity  
189 switching of 5 ms. All quantitative data were processed using MultiQuant software V 3.0.2 (Sciex,  
190 Canada). GA<sub>1</sub>, GA<sub>3</sub> were not detected in the samples.

### 191 **Candidate gene identification**



192 In order to select and investigate genes involved in the hormonal signaling pathways, we used the  
193 functional annotation tools Mercator4 (Schwacke et al. 2019) and egglog (Huerta-cepas et al. 2017,  
194 2019) on the sweet cherry ‘Regina’ genome (v1.0; Le Dantec et al. 2020). Results for the annotated  
195 sweet cherry genes were cross-checked using pairwise sequence comparison with *Arabidopsis*  
196 *thaliana* proteins. Genes were identified in the obtained annotation database by key words and gene  
197 names from the literature, including Arabidopsis genes identified by Howe and colleagues (Howe et al.  
198 2015). Details on the identified genes are available in Table S2 (Supplementary file at *Tree Physiology*  
199 online).

## 200 RNA-seq and differential expression analysis

201 Total RNA was extracted and sequenced as described in Vimont et al. (2019). Sequencing data are  
202 available online (Gene Expression Omnibus GSE130426). The quality of raw reads was assessed using  
203 FastQC ([www.bioinformatics.babraham.ac.uk/projects/fastqc/](http://www.bioinformatics.babraham.ac.uk/projects/fastqc/)) and possible adaptor contaminations  
204 and low quality trailing sequences were removed using Trimmomatic (Bolger et al. 2014). Raw reads  
205 sequences were previously mapped on the peach (*Prunus persica*) reference genome in a published  
206 analysis (Vimont et al. 2019). Here, we decided to remap the reads to the to the sweet cherry ‘Regina’  
207 genome (v1.0; Le Dantec et al. 2020) using STAR (Dobin et al. 2013). Raw counts for each transcript  
208 were calculated using HTSeq (Anders et al. 2015). For the number of input reads and the percentage of  
209 mapped reads in each sample, please refer to Table S1. For each gene, Transcripts Per Million reads  
210 (TPM) were calculated (Wagner et al. 2012). TPM for the genes analysed in this study are available in  
211 the supplementary data file at *Tree Physiology* online. Differentially expressed genes (DEGs) for each  
212 combination of dormancy stages (pre-dormancy, endodormancy, dormancy breaking and ecodormancy)  
213 were assessed using DESeq2 R Bioconductor package (Love et al. 2014), in the statistical software R (R  
214 Core Team 2018), on filtered data. Genes with an adjusted *p-value* (*padj*) < 0.05 (Benjamini-Hochberg  
215 multiple testing correction method) and a log<sub>2</sub>Fold change > 1, in at least one of the comparisons, were  
216 assigned as DEGs (Table S3, Supplementary file at *Tree Physiology* online). We confirmed that the  
217 reads mapping from the different cultivars to the sweet cherry sequences of the candidate genes was  
218 similar in coverage (Fig. S2, Fig. S3), therefore supporting the robustness of the expression comparison  
219 between cultivars, expressed in TPM.

## 220 Modelling

221 In order to explore the differences in the expression of ABA in the two cultivars, ‘Cristobalina’ and  
222 ‘Regina’, we took a mathematical modelling approach. We constructed a model incorporating  
223 information from the genes involved in the ABA signalling pathway.

224 Since NCEDs and CYP707As and UGT71B6 have been implicated in the production and catabolism of  
225 ABA, respectively, they were considered in the production and decay rates of ABA. ABA level at  
226 different times, *t*, for each cultivar is described by an ordinary differential equation:

$$\begin{aligned}
 227 \quad \frac{d ABA_i(t)}{dt} &= p_{NCED1}^i * NCED1_i(t) + p_{NCED3}^i * NCED3_i(t) + p_{NCED4}^i * NCED4_i(t) + p_{NCED9}^i \\
 228 \quad &\quad * NCED9_i(t) \\
 229 \quad &\quad - \left( p_{CYP707A1b}^i * CYP707A1b_i(t) + p_{CYP707A2}^i * CYP707A2_i(t) + p_{CYP707A4a}^i \right. \\
 230 \quad &\quad * CYP707A4a_i(t) + p_{CYP707A4b}^i * CYP707A4b_i(t) + p_{CYP707A4c}^i * CYP707A4c_i(t) \\
 231 \quad &\quad \left. + p_{UGT71B6}^i * UGT71B6_i(t) \right) * ABA_i(t)
 \end{aligned}$$

232 for  $i=1,2$ , where  $i=1$  represents the index of cultivar ‘Regina’ and  $i=2$  is the index of cultivar  
 233 ‘Cristobalina’.

234 In both cultivars, for the sake of simplicity, it was assumed that the rates are linearly dependent on the  
 235 gene levels. For example, the rate of NCED1–dependent ABA production in Regina at a time  $t$  is  
 236 described by  $p_{NCED1}^1 * NCED1_1(t)$  where  $p_{NCED1}^1$  is a non-negative rate constant (model parameter).  
 237 Genes (*NCEDs*, *CYP707As* and *UGT*) are treated as the time-dependent parameters of the model and  
 238 their values are taken from the data. More precisely, going back to the earlier example, the level of  
 239 *NCED1* in ‘Regina’, labelled  $NCED1_1(t)$ , is a function of time  $t$  with values calculated from linearly  
 240 interpolated mean ‘Regina’ data values of *NCED1*. Initial level of ABA at time 0 in each cultivar, i.e.  
 241  $ABA(0)$ , is taken to be the mean level of ABA on the first day of measurement.

242 In order to show whether the differential in ABA in the two cultivars could be explained solely by the  
 243 differences in *NCEDs*, *CYP707As* and *UGT*, we tested whether there exists a set of parameters where  
 244 the parameter values for both cultivar models are the same (i.e.  $p_{NCED1}^1 = p_{NCED1}^2, p_{NCED3}^1 = p_{NCED3}^2$   
 245 and so on) but for which the model simulations can show the ABA differences seen between the two  
 246 cultivars. Latin Hypercube Sampling was used to select 100,000 parameter sets of  $X$  parameters ( $X$   
 247 being the number of genes used in the model). Since the gene levels can peak with level (in TPM) of  
 248 up to 100 times higher than ABA levels (in ng/mg), the production and decay rate constants were  
 249 bounded above by 0.001 and 0.005, respectively. We selected the parameter set with the lowest sum of  
 250 the least squares as the best model for simulation and prediction. Once the model solutions were  
 251 calculated, predictions for the best model were evaluated by comparing predicted ABA levels to  
 252 measured ABA content in all ‘Regina’ and ‘Cristobalina’ samples using root mean square error (RMSE).

253 To explore which genes may have more or less significant effect on ABA levels during dormancy, we  
 254 tested different combinations of genes, decreasing the number of genes from 10 to 3. Since testing all  
 255 possible combinations would be very computationally expensive (for example, just selecting 7 out of 10  
 256 genes would require testing  $10!/(7! \times 3!) = 120$  combinations of models), we decided to take a different  
 257 approach. For the 9 gene models, we tested all nine model combinations where one gene is removed,  
 258 and we selected the one with the lowest sum of the least squares as the best model for simulation and  
 259 prediction, namely the 9 gene model that omits *PavCYP707A2* (Table S4, Supplementary file at *Tree*



260 *Physiology* online). At the next step, when testing the 8 gene models, we removed *PavCYP707A2* and  
 261 one of the other genes in turn. We tested now eight model combinations, repeating our steps above,  
 262 down to the 3 gene models (see Table S4 for more details on the tested combinations). Comparison of  
 263 the best fitting models for each of the 3 to 10 gene models (with details listed in Table S4), revealed that  
 264 a model with 6 genes had the lowest sum of the least squares overall. Finally, using the mean data  
 265 measurements for *PavNCEDs*, *PavCYP7074As* and *PavUGT71B6* of the cultivar ‘Garnet’, we used this  
 266 6 gene model to predict the levels of ABA in the ‘Garnet’ cultivar. Since the initial value of ABA content  
 267 in ‘Garnet’ cultivar was not measured, we took it arbitrarily to be 1 at the time 0 (this being a value that  
 268 also falls within the range of the initial ABA levels of the ‘Regina’ and ‘Cristobalina’ cultivars).

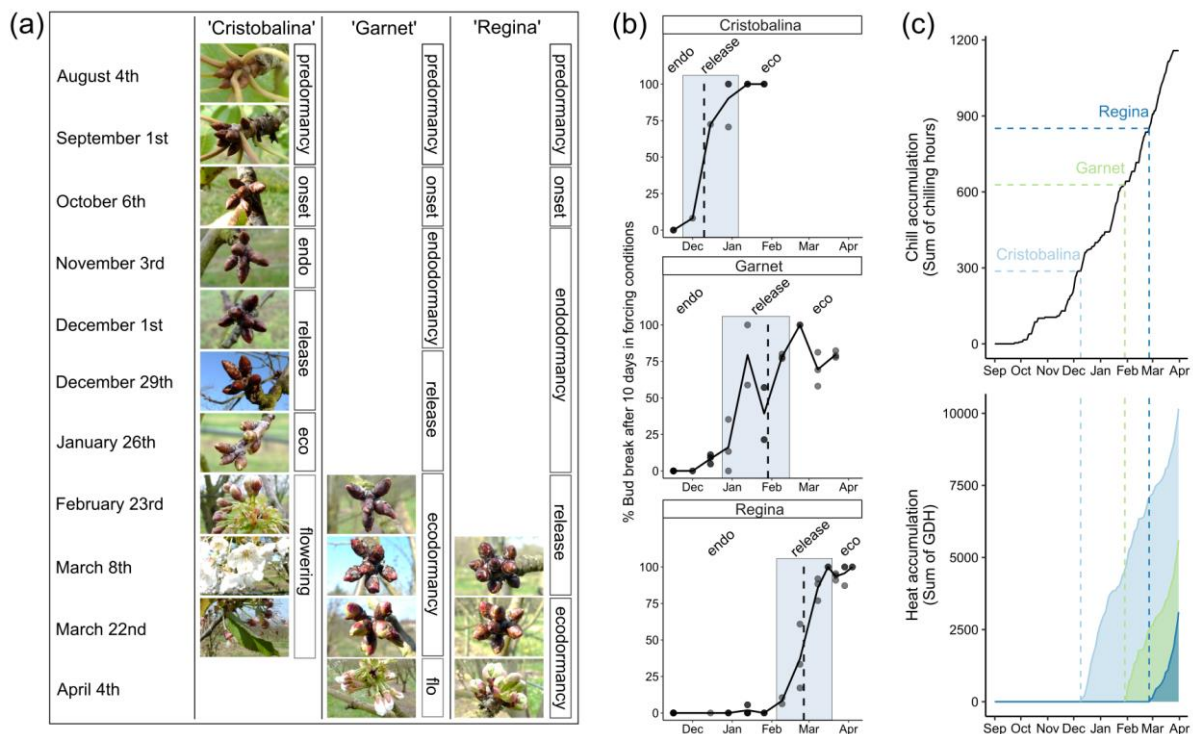

269 **Figure 2**

**Dormancy status defined for the three sweet cherry cultivars.** (a) bud stages at the sampling dates and the corresponding dormancy status as defined in the current study; (b) Evaluation of bud break percentage under forcing conditions was carried out for three sweet cherry cultivars displaying very early, early and late flowering dates: ‘Cristobalina’, ‘Garnet’ and ‘Regina’ respectively. The dotted line corresponds to the dormancy release dates, estimated at 50% of bud break after ten days under forcing conditions. Dots indicate the data points for the biological replicates; (c) Chill and heat accumulation for the three cultivars estimated using the dormancy release date and temperatures. Chill accumulation (calculated as the sum of chilling hours) stops after dormancy release, then followed by heat accumulation (calculated as the sum of growing degree hours, GDH).

270

## 271 RESULTS

### 272 Definition of the flower bud dormancy status of three cultivars with different flowering dates

273 We selected three sweet cherry cultivars based on their different dates of flowering: very early, early  
 274 and late for ‘Cristobalina’, ‘Garnet’ and ‘Regina’, respectively. The stages of bud dormancy were

275 defined based on anatomical and physiological elements (Fig. **2a**). We associated predormancy with  
276 developmental stages of the flower buds along green leaves and active growth (July to September).  
277 Dormancy onset is often hypothesized to occur at leaf fall (Chmielewski et al. 2017) and we observed  
278 leaf senescence at the beginning of October and complete leaf fall at the end of October. Therefore,  
279 dormancy onset was set in October and the beginning of endodormancy was established in November  
280 (Fig. **2a**). These stages were similar for all three cultivars. By definition, endodormancy correspond to  
281 the bud inability to fully develop under growth-inducing conditions while dormancy is considered as  
282 released when bud break is triggered by warm temperatures and/or long photoperiod (Lang et al. 1987).  
283 Consequently, dormancy status was assessed by forcing tests on branches carrying flower buds (Fig.  
284 **2b**). Endodormancy was defined for the dates with no bud break under forcing conditions (Fig. 2).  
285 Incomplete bud break within the population of flower buds indicated dormancy release stages while  
286 ecodormancy was defined by optimal bud break response to growth conditions (90-100% bud break;  
287 Fig. 2). Here, the three cultivars were much contrasted in the timing of their dormancy phases,  
288 ‘Cristobalina’ exhibiting dormancy release on December 9<sup>th</sup> (corresponding to a chill accumulation of  
289 287 CH; Fig. **2c**), seven weeks earlier than ‘Garnet’ (January 29<sup>th</sup>; 628 CH; Fig. **2c**) and ten weeks earlier  
290 than ‘Regina’ (February 26<sup>th</sup>; 851 CH; Fig. **2c**).

291

## 292 **Exogenous GA application accelerates bud dormancy release**

293 GA and ABA effect on the bud break response to forcing conditions was evaluated on branches carrying  
294 dormant flower buds as assessed by forcing tests on the late flowering cultivar ‘Fertard’ (Fig. **S1**).  
295 Results revealed that GA<sub>3</sub> and GA<sub>4</sub> both had significant dormancy alleviating effects, characterized by  
296 higher bud break percentage, which was confirmed for GA<sub>3</sub> in a second experiment in 2018 (Fig. **3**, Fig.  
297 **S4**). However, no antagonist effect, namely bud break inhibition, was observed after a treatment with  
298 paclobutrazol, suggesting that GA biosynthesis was not required for the observed response to warm  
299 conditions.

300 In both seed and bud dormancy, it is hypothesized that GAs and ABA act antagonistically to control  
301 growth resumption and inhibition, respectively. We therefore tested the potential inhibiting effect of  
302 ABA on flower bud emergence. We did not observe a significant effect of ABA treatment on dormancy  
303 release, but bud break for ABA-treated branches was slightly higher than the control (Fig. 3, Fig. S4).  
304 However, inhibiting ABA biosynthesis with fluridone activated bud break, consistent with the  
305 established role of ABA in promoting dormancy.

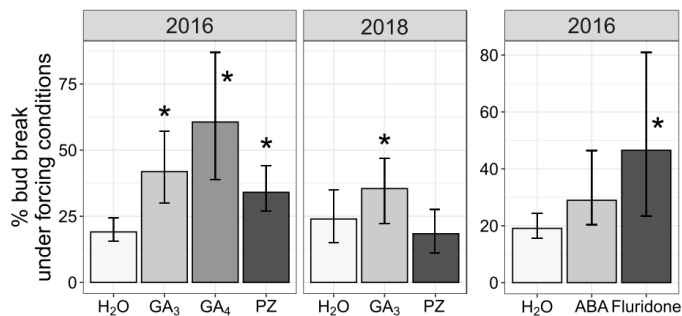

**Figure 3**  
**Effect of different GAs, ABA and their inhibitor on the sweet cherry dormancy status.** Sweet cherry branches were treated with (a) 5  $\mu$ M GA<sub>3</sub>, 5  $\mu$ M GA<sub>4</sub>, 300  $\mu$ M, paclobutrazol (GA pathway inhibitor), (b) 400  $\mu$ M ABA and 5  $\mu$ M fluridone (ABA pathway inhibitor) and transferred under forcing conditions (25°C, 60-70% humidity, 16 hours light). The percentage of flower bud break was recorded after 20 days. Error bars indicate the data range between the five biological replicates. Asterisks indicate treatments that differ significantly from untreated branches (Kruskal-Wallis test,  $p < 0.05$ ). ABA: Abscisic acid; GA: Gibberellic acid.

306

### 307 GA content changes during flower bud dormancy progression

308 In recent studies, distinct functions were identified for gibberellins during bud dormancy (Zhuang et al.  
309 2013, Zheng et al. 2018). To test whether these results could be confirmed in sweet cherry buds, GA  
310 levels were determined over the whole bud development cycle in the very early and late flowering  
311 cultivars, 'Cristobalina' and 'Regina'. In details, we studied the content of bioactive GA<sub>1</sub>, GA<sub>3</sub> GA<sub>4</sub> and  
312 GA<sub>7</sub> but the levels of GA<sub>1</sub> and GA<sub>3</sub> were undetectable in the samples. GA<sub>4</sub>, GA<sub>7</sub> have a similar pattern  
313 over dormancy progression (Fig. 4) rising from July onwards, which corresponds to flower primordia  
314 initiation and organogenesis. Bioactive GA levels also increase at the beginning of endodormancy  
315 (November – December), reaching their highest concentration during dormancy release. Results show  
316 a sharp decrease in the levels of GA<sub>4</sub> and GA<sub>7</sub> overlapping with ecodormancy for 'Cristobalina', which  
317 could not be observed for the late cultivar 'Regina', potentially due to the lack of ecodormancy coverage.  
318 Interestingly, the levels of GA<sub>4</sub>, and GA<sub>7</sub> significantly differed between the two cultivars, especially  
319 during endodormancy and when dormancy release was triggered in the early cultivar (Fig. S5b). Notable  
320 differences in GA<sub>7</sub> content were observed between these two cultivars during the entire time course, in  
321 which the late cultivar buds contained more GA<sub>7</sub> than the early cultivar (Fig. 4) while levels for GA<sub>4</sub>  
322 were significantly higher in the early cultivar during endodormancy (Fig. S5b). Among the quantified  
323 active GAs, GA<sub>4</sub> was detected at levels between three and eight times higher than GA<sub>7</sub>. GA<sub>4</sub> was

324 detected at higher levels in the early cultivar ‘Cristobalina’, with a relatively high level reached just after  
325 dormancy release in December. By contrast, levels of GA<sub>7</sub> were higher in ‘Regina’, but with the maximal  
326 concentration measured just after dormancy release.

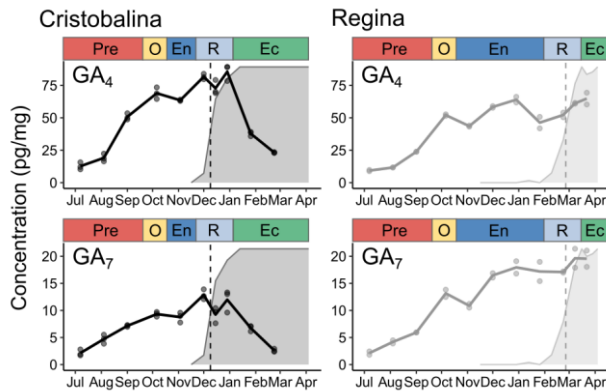

**Figure 4**  
**Levels of endogenous bioactive GA<sub>4</sub> and GA<sub>7</sub> in the flower buds of two sweet cherry cultivars during bud development.** Black: ‘Cristobalina’, grey: ‘Regina’. Background areas correspond to the dormancy depth evaluated as the percentage of bud break under forcing conditions (see Fig. 2b). Dotted lines represent dormancy release. GA: Gibberellic acid; Pre: Predormancy; O: dormancy onset; En: Endodormancy; R: Dormancy release; Ec: Ecodormancy.

327

### 328 **Expression of GA pathway-related genes have distinct patterns during sweet cherry bud** 329 **dormancy**

330 To better understand the mechanisms linked to the GA pathway during dormancy progression, we  
331 investigated genes involved in GA biosynthesis pathway, degradation, signal transduction and response.  
332 We found eleven *PavGA20ox* and five *PavGA3ox* for GA biosynthesis genes in the peach database  
333 (Table S2) but only four genes were differentially expressed over the dormancy period: *PavGA20ox1b*,  
334 *PavGA20ox1c*, *PavGA3ox1a* and *PavGA3ox4* (Fig. 5, Table S3). Interestingly, *PavGA20ox1c*  
335 expression increased in December for both cultivars, regardless of their dormancy status but decreased  
336 prior to dormancy release. The marked increase in *PavGA20ox1c* expression could be correlated with  
337 the production of GAs around December (Fig. 4). The last step of active GA biosynthesis relies on the  
338 activity of GA3ox essentially for the production of GA<sub>1</sub> and GA<sub>4</sub>. Expression for *PavGA3ox4* increases  
339 as early as dormancy onset (October), followed by a sharp increase during endodormancy, reaching its  
340 highest expression value at maximum dormancy depth in December, for both cultivars (Fig. 5).  
341 *PavGA3ox4* is then downregulated during or after dormancy release, with a marked lag between the two  
342 cultivars, potentially linked to their separate dormancy release date (Fig. 5). Interestingly, *PavGA20ox1b*  
343 and *PavGA3ox1a* were both expressed during late ecodormancy, but with no obvious correlation with  
344 high GA levels (Fig. 4). These results suggest that GA biosynthesis may not be activated after dormancy  
345 release, which is consistent with the previous observation that GA biosynthesis may not be needed for  
346 the initiation of ecodormancy. We identified four differentially expressed *PavGA2ox* genes, involved in  
347 GA inactivation (Fig. 5, Tables S2, S3). *PavGA2ox2*, *PavGA2ox8a* and *PavGA2ox8c* genes were  
348 expressed before dormancy and during the early stages of dormancy. *PavGA2ox8b* and *PavGA2ox8c*  
349 were highly expressed during endodormancy, concomitantly with *PavGA3ox4* expression, thus

350 suggesting a balance between synthesis and degradation that closely controls the levels of bioactive  
 351 GAs.

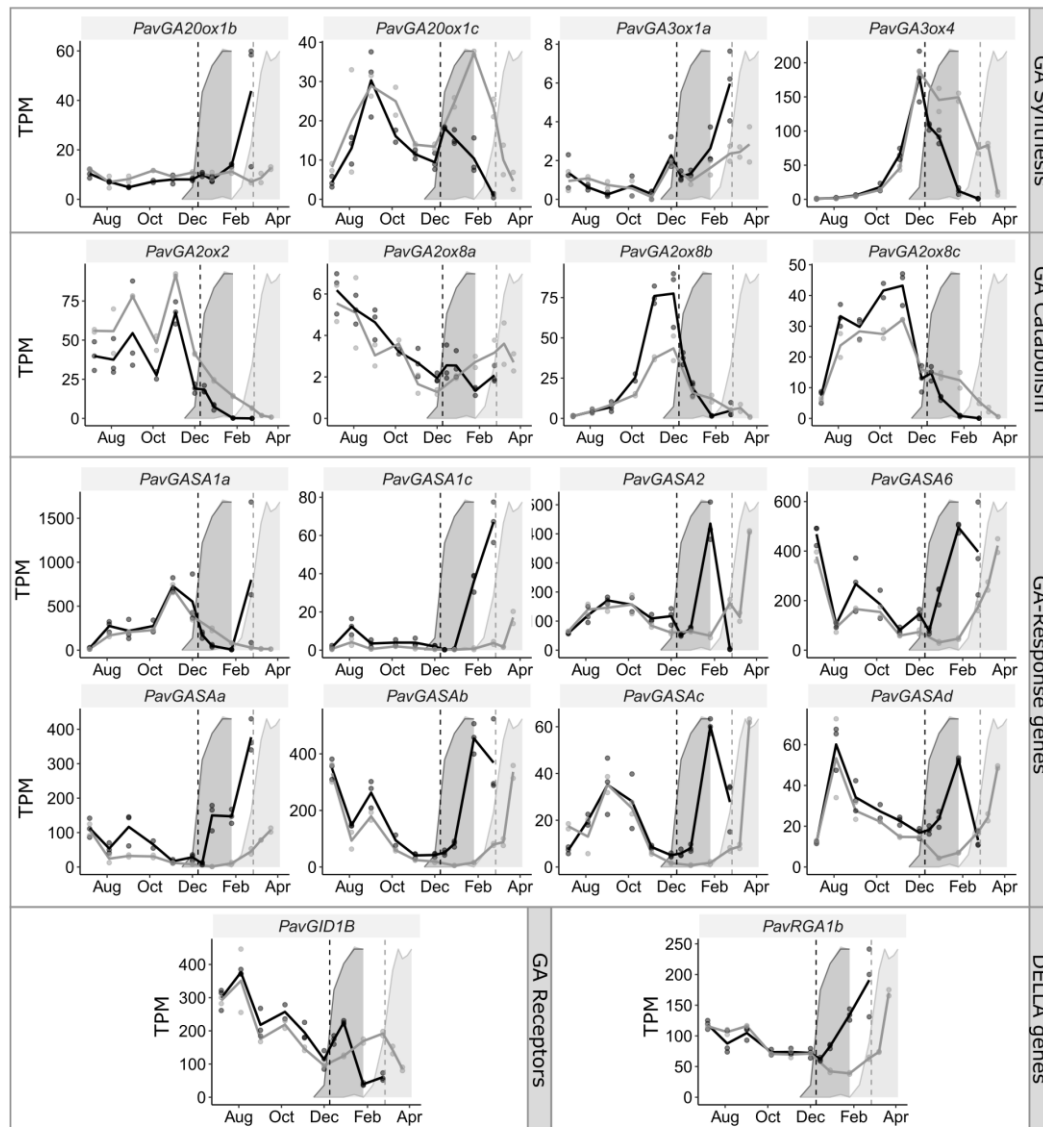

**Figure 5** Transcriptional dynamics of genes associated with GA pathway in the flower buds of two sweet cherry cultivars during bud development. Expression of specific genes involved in GA biosynthesis pathway, degradation, signal transduction and response are represented in TPM (Transcripts Per Million reads). Black: ‘Cristobalina’, grey: ‘Regina’. Background areas correspond to the dormancy depth evaluated as the percentage of bud break under forcing conditions (see Fig. 2b). Dotted lines represent dormancy release. GA: Gibberellic acid; GA20ox: GA 20-oxidases, GA3ox: GA 3-oxidases; GA2ox: GA 2-oxidases; GID: GA INSENSITIVE DWARF; GASA: GA Stimulated Arabidopsis; RGA: REPRESSOR OF GA.

352

353 In terms of GA signaling, our results show that the identified GA receptor-related *GA INSENSITIVE*  
 354 *DWARF1B* (*PavGID1B*) is highly expressed during the predormancy (July, August) and early stages of  
 355 dormancy (September, October; Fig. 5). For ‘Cristobalina’, expression of the receptor gene sharply  
 356 decreased after endodormancy was released. Ten GA-response genes, *GA Stimulated Arabidopsis*  
 357 (*GASA*), potentially regulated by GAs (Aubert et al. 1998), were identified in the transcript dataset  
 358 (Table S2) and we analyzed the eight genes differentially expressed during flower bud cycle (Fig. 5,



359 Table S3). Expression patterns are diverse but for the majority (*PavGASA1c, 6, a, b, c, d*), a decrease in  
 360 expression was detected during deep dormancy (November, December), thus suggesting that GA-  
 361 activated pathways are inhibited during dormancy, despite high contents in GAs (Fig. 4). More  
 362 strikingly, all *PavGASA* genes were sharply upregulated during dormancy release. However, one notable  
 363 exception is *PavGASA1a* that is highly activated specifically during dormancy (Fig. 5). The repression  
 364 of GA by DELLA proteins is well characterized in annuals (Zentella et al. 2007), so to further investigate  
 365 GA pathway, we identified five genes coding for predicted DELLAs, namely *PavRGA1a, b, PavRGL3a,*  
 366 *b, c* (Table S2). Among them, only *PavRGA1b* was differentially expressed during bud development,  
 367 characterized by a marked expression increase during dormancy release and ecodormancy (Fig. 5).

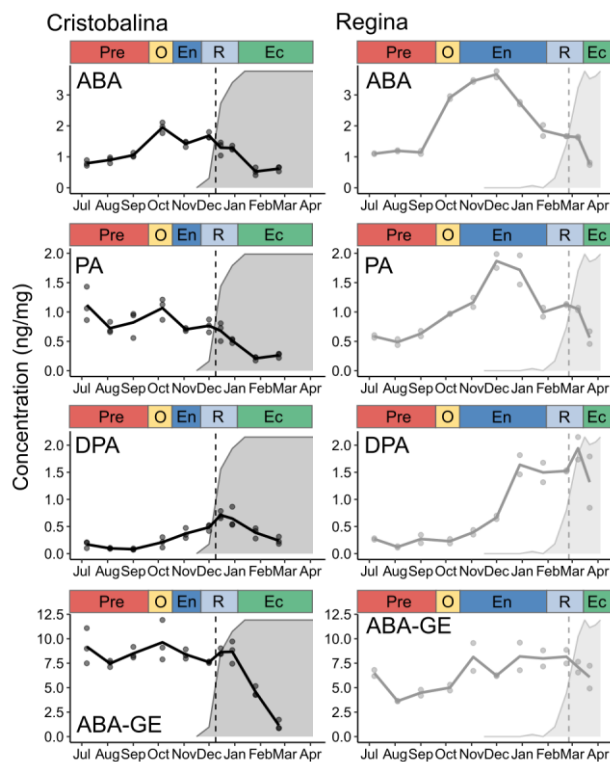

**Figure 6**  
**Levels of endogenous bioactive ABA and ABA conjugates in the flower buds of two sweet cherry cultivars during bud development.** Black: ‘Cristobalina’, grey: ‘Regina’. Background areas correspond to the dormancy depth evaluated as the percentage of bud break under forcing conditions (see Fig. 2b). Dotted lines represent dormancy release. ABA: Abscisic acid; PA: phaseic acid; DPA: dihydrophaseic acid, ABA-GE: ABA-glucose ester; Pre: Predormancy; O: dormancy onset; En: Endodormancy; R: Dormancy release; Ec: Ecodormancy.

368

### 369 ABA levels rise at the onset of dormancy

370 Several studies have highlighted a strong correlation between ABA content and dormancy status and to  
 371 address this issue in sweet cherry flower buds, we measured ABA levels, as well as PA and DPA, which  
 372 are catabolites of ABA, in both cultivars. Results show an increase in ABA and PA content during the  
 373 early stages of dormancy, reaching their highest levels in October and December for ‘Cristobalina’ and  
 374 ‘Regina’, respectively, which is approximately two months prior to dormancy release for both cultivars.  
 375 This ABA peak is followed by a decrease in ABA levels, accompanied by increased levels of DPA,  
 376 preceding dormancy release (Fig. 6). ABA, PA and DPA levels detected during dormancy for the early  
 377 cultivar ‘Cristobalina’ are significantly lower than for the late cultivar (Fig. S5a). We can therefore  
 378 hypothesize that dormancy depth may be correlated with ABA contents in sweet cherry buds.



379 Esterification of ABA with glucose was also monitored and the concentrations of ABA-GE were higher  
 380 in both cultivars compared with ABA and its conjugates. The ABA-GE content was constantly high in  
 381 ‘Regina’ over the whole cycle, with a slight increase during endodormancy induction, while it markedly  
 382 decreased in ‘Cristobalina’ during ecodormancy (Fig. 6, Fig. S5a). However, this observation could be  
 383 due to a low coverage of ecodormancy in the ‘Regina’ samples. Throughout pre-dormancy stages, ABA-  
 384 GE content was significantly higher in the early cultivar ‘Cristobalina’ compared to the late cultivar  
 385 ‘Regina’ (Fig. S5a).

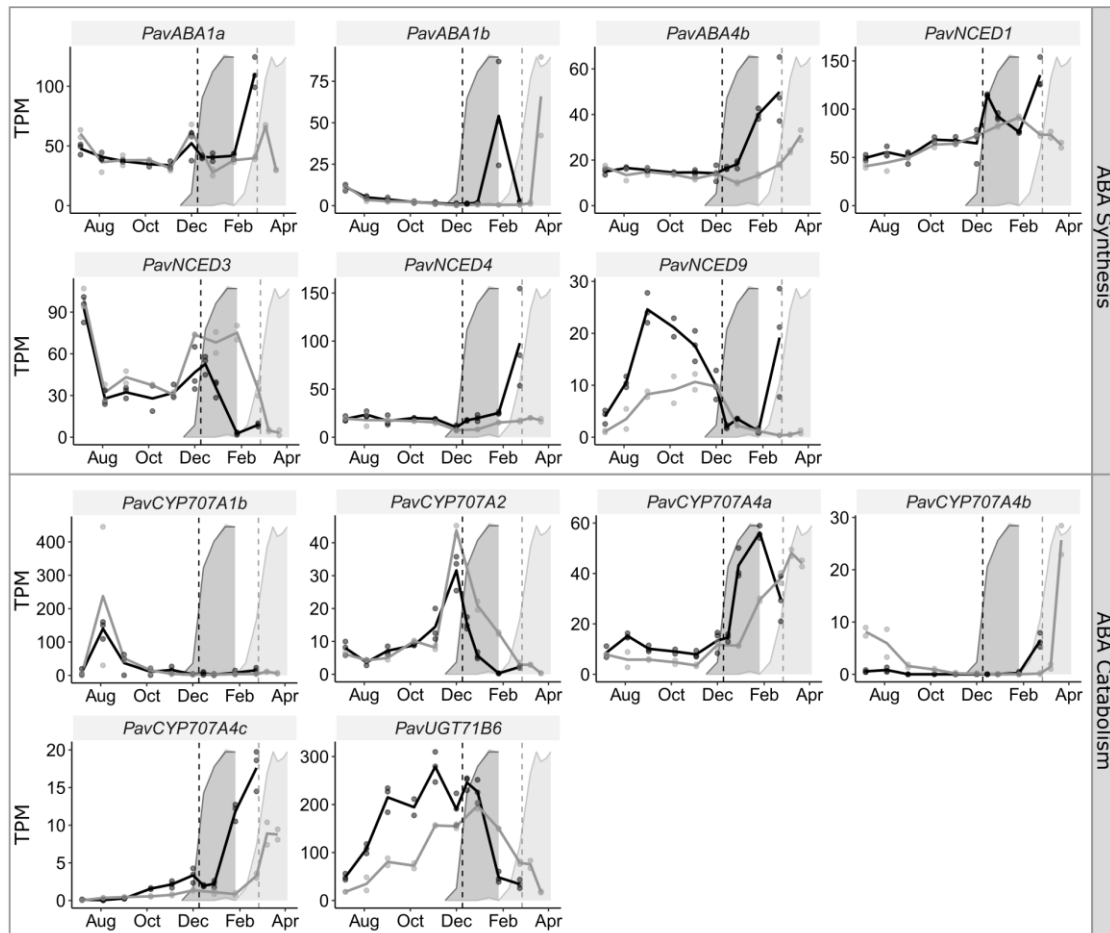

**Figure 7** Transcriptional dynamics of genes associated with ABA biosynthesis and catabolism in the flower buds of two sweet cherry cultivars during bud development. Expression of specific genes are represented in TPM (Transcripts Per Million reads). Black: ‘Cristobalina’, grey: ‘Regina’. Background areas correspond to the dormancy depth evaluated as the percentage of bud break under forcing conditions (see Fig. 2b). Dotted lines represent dormancy release. ABA: Abscisic acid; NCED: 9-cis epoxy-carotenoid dioxygenase; UGT: UDP-GLYCOSYLTRANSFERASE.

386

### 387 Analysis of genes involved in ABA pathway

388 We further explored the genes involved in ABA biosynthesis and catabolism. Expression for genes involved  
 389 in the multiple ABA biosynthesis steps, *PavABA1a*, *PavABA1b*, *PavABA4b*, *PavNCED1* and  
 390 *PavNCED4*, is not correlated with ABA levels while expression patterns for *PavNCED3* and

391 *PavNCED9* genes seem strongly linked to ABA contents and dormancy status (Fig. 7). In particular,  
 392 *PavNCED9* expression shows a sharp increase during dormancy onset and a marked decay before  
 393 dormancy release. On the other hand, low ABA levels are associated with increased expression for ABA  
 394 catabolism genes *PavCYP707A1b* and *PavCYP707A4s* before and after dormancy respectively (Fig. 7).  
 395 By contrast, *PavCYP707A2* is characterized by a sharp increase in December, followed by a marked  
 396 decrease during dormancy release in ‘Cristobalina’ but before induction of dormancy release in  
 397 ‘Regina’. In addition, we identified *PavUGT71B6* (Supporting Information Table S2), a sweet cherry  
 398 ortholog of the *Arabidopsis thaliana* UDP-glycosyltransferase 71B6, that preferentially glycosylates  
 399 ABA into ABA-GE (Priest et al., 2006). *PavUGT71B6* was considerably upregulated in the early  
 400 cultivar compared to the late cultivar, with a gradual increase between July and deep dormancy followed  
 401 by a decrease in expression during endodormancy release (Fig. 7).

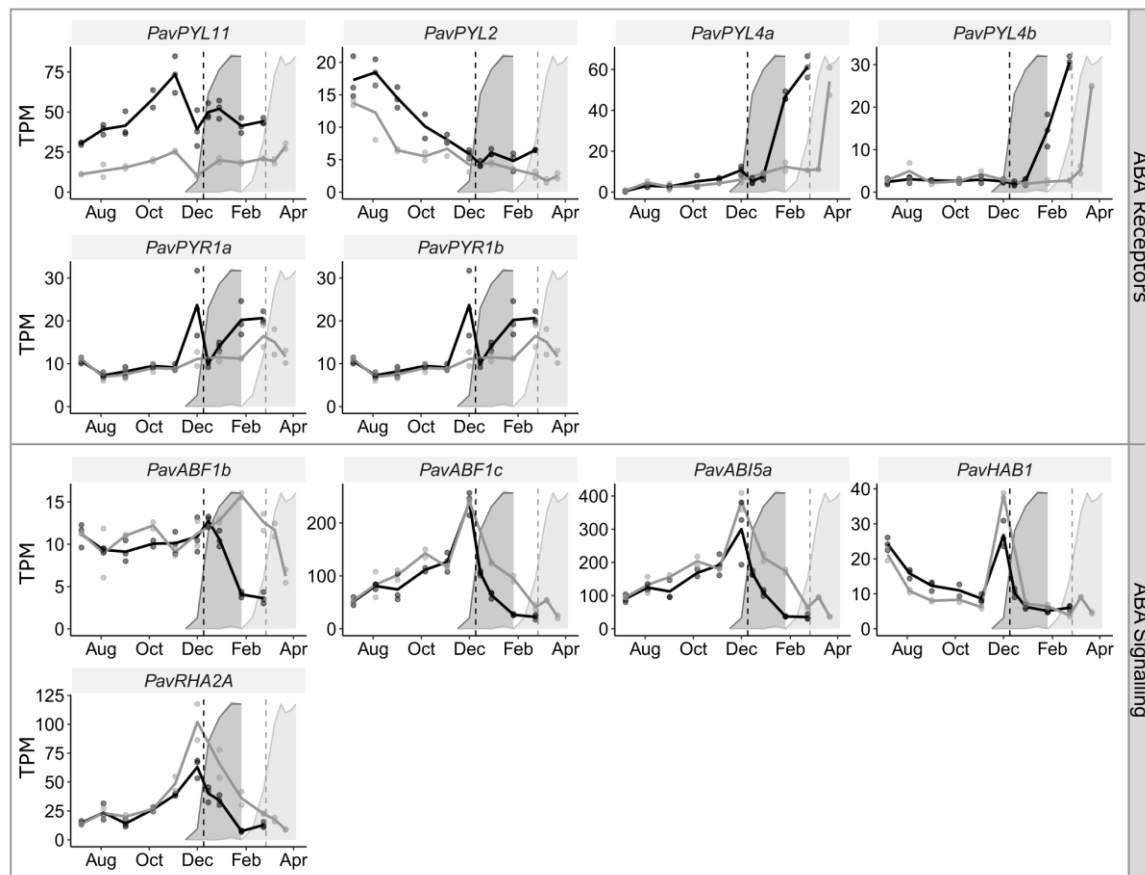

**Figure 8** Transcriptional dynamics of genes associated with ABA signalling in the flower buds of two sweet cherry cultivars during bud development. Expression of specific genes are represented in TPM (Transcripts Per Million reads). Black: ‘Cristobalina’, grey: ‘Regina’. Background areas correspond to the dormancy depth evaluated as the percentage of bud break under forcing conditions (see Fig. 2b). Dotted lines represent dormancy release. ABA: Abscisic acid; PYR: PYRABACTIN RESISTANCE; PYL: PYR-like; ABF: ABSCISIC ACID RESPONSIVE ELEMENTS-BINDING PROTEIN; ABI; ABA INSENSITIVE; HAB: homology to ABI2; RHA2A: RING-H2 A.

402

403 In addition, we examined sweet cherry gene predictions for genes involved in ABA signaling (Fig. 8).  
 404 Among the eight ABA receptors *PYR/PYL* genes identified for sweet cherry (Table S2), six were

405 differentially expressed during flower bud dormancy (Fig. 8, Table S3). In particular, *PavPYL11*  
 406 expression was correlated with ABA levels in ‘Cristobalina’, increasing after dormancy onset and  
 407 decaying after dormancy release (Fig. 8), but not in ‘Regina’. However, for the *PavPYL2* and  
 408 *PavPYL4a/b* genes, the expression was activated before and after endodormancy, respectively. In terms  
 409 of ABA-mediated signals, differentially expressed ABA response genes, *PavABF1c*, *PavABI5a*,  
 410 *PavHAB1* and *PavRHA2A*, had similar patterns with a sharp increase in expression in December and a  
 411 marked inhibition after the peak (Fig. 8).

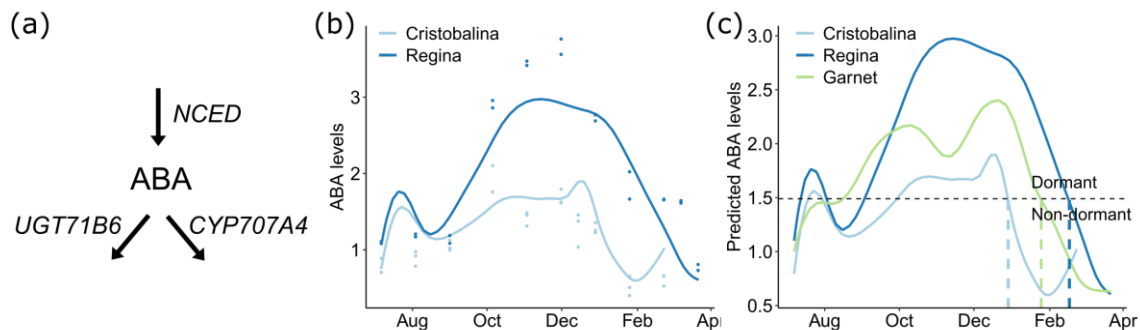

**Figure 9 Modelling ABA.** (a) Conceptual model used to simulate ABA content. ABA synthesis is controlled by *PavNCED1*, *PavNCED3*, *PavNCED4* and *PavNCED9* proteins; ABA is deactivated by 8'-hydroxylases *PavCYP707A4* and *PavUGT71B6*. The assumption is that enzymatic activity is proportional to gene expression levels. (b) Simulated content of ABA using the model (lines) with means of data (circles) for cultivars ‘Cristobalina’ and ‘Regina’. The best model was obtained for simulation with parameters:  $p_{NCED1}^{1,2} = 0.000942$ ,  $p_{NCED3}^{1,2} = 0.00073$ ,  $p_{CYP707A1b}^{1,2} = 0.000251$ ,  $p_{CYP707A4a}^{1,2} = 0.002085$ ,  $p_{CYP707A4c}^{1,2} = 0.001876$  and  $p_{UGT71B6}^{1,2} = 0.0001043$ . (c) Simulated levels of ABA for cultivars ‘Cristobalina’ and ‘Regina’, that were used to calibrate the model, and for ‘Garnet’. Arbitrary level of ABA set at 1.49 ng/mg (black dash line) is reached by ‘Cristobalina’, ‘Garnet’ and ‘Regina’ simulations on December 29<sup>th</sup>, January 25<sup>th</sup> and February 17<sup>th</sup>, respectively (colored dash lines). ABA: Abscisic acid; NCED: 9-cis epoxy-carotenoid dioxygenase; UGT: UDP-GLYCOSYLTRANSFERASE.

412

### 413 Modelling suggests ABA levels control onset and duration of dormancy

414 Based on observations that ABA levels are correlated with dormancy depth, ABA content has been  
 415 proposed as an indicator to assess dormancy status in sweet cherry (Chmielewski et al. 2017). We further  
 416 investigated the dynamics of ABA biosynthesis and catabolism to estimate dormancy onset and duration.  
 417 First, we assumed that ABA synthesis is mainly controlled by *PavNCED1*, 3, 4 and 9 while ABA is  
 418 converted to PA by 8'-hydroxylases *PavCYP707A* and esterified into ABA-GE by *PavUGT71B6* (Fig.  
 419 9a). Since data for protein activity are not available, we used transcript levels as a proxy for enzymatic  
 420 activity. We then used an Ordinary Differential Equation (ODE) approach to model how dormancy may  
 421 be regulated by ABA levels. Among all tested gene combinations, the best model simulates ABA content  
 422 based on the expression of only six genes, namely *PavNCED1*, *PavNCED3*, *PavCYP707A1b*,  
 423 *PavCYP707A4a*, *PavCYP707A4c* and *PavUGT71B6* (Table S4, Fig. S6). The mathematical model,  
 424 based on identical parameter set for both cultivars, shows a good fit to the data, with a global RMSE  
 425 equal to 0.38 for all data, and 0.33 and 0.44 for ‘Cristobalina’ and ‘Regina’ respectively indicating that

426 the differential in ABA levels between the two cultivars may be explained by the differences in gene  
427 expression of the relevant enzymes (Fig. 9b). To validate the model, we simulated ABA levels for a  
428 third cultivar ‘Garnet’ that was examined along ‘Cristobalina’ and ‘Regina’. Endodormancy was  
429 released on January 21<sup>st</sup> for ‘Garnet’, an early flowering cultivar. Based on expression data for  
430 *PavNCED1* and 3, *PavCYP707A1b*, *PavCYP707A4a*, *PavCYP707A4c* and *PavUGT71B6* genes (Fig. 9,  
431 Fig. S7), the model simulated ABA levels for ‘Garnet’ during dormancy (Fig. 9c). Simulated ABA  
432 content for ‘Garnet’ increases during dormancy onset, reaches high values during endodormancy and  
433 decreases before dormancy release, later than for the very early cultivar ‘Cristobalina’, and earlier than  
434 for the late cultivar ‘Regina’. Highest estimated levels for ABA are lower in ‘Garnet’ than in ‘Regina’  
435 but higher than ‘Cristobalina’.

436 Observed and simulated levels of endogenous ABA at the date of dormancy release show a good match  
437 for both ‘Cristobalina’ and ‘Regina’ cultivars (Fig. 6, Fig. 9b). ABA levels are low before dormancy  
438 onset but as they increase dormancy is triggered; high ABA levels maintain dormancy but they decrease  
439 under chilling temperatures and endodormancy is released as ABA content falls. Model simulations  
440 show a peak in July, which is missing from the measured ABA levels. The Garnet ABA simulated levels  
441 lie between those of ‘Cristobalina’ and ‘Regina’ levels, thus if ABA content is related to dormancy  
442 release, then our modelling predicts that under a chosen fixed threshold of ABA, Garnet dormancy  
443 release will occur between the other two release dates. For example, ABA simulated levels of  
444 ‘Cristobalina’, ‘Regina’ and ‘Garnet’ would fall below the average threshold of 1.49 ng/mg on December  
445 29<sup>th</sup>, February 17<sup>th</sup> and January 25<sup>th</sup>, respectively. Choice of any other threshold during this period will  
446 result in the same date order. Such ordering is observed in our data for dormancy release (Fig. 2a);  
447 ‘Cristobalina’ and ‘Regina’ release dates are December 9<sup>th</sup> and February 26<sup>th</sup>, while ‘Garnet’ release date  
448 is the January 29<sup>st</sup>; thus opening the possibility that there is a threshold for ABA concentration that  
449 determines the dormancy status. Since we can account for the dormancy behavior of different cultivars  
450 based on the expression of a small number of key genes regulating ABA levels, this underscores the  
451 central role of this phytohormone in the control of dormancy progression.

452

## 453 **DISCUSSION**

### 454 **Sweet cherry specific GA signaling during bud dormancy**

455 We have shown that GA<sub>3</sub> and GA<sub>4</sub> have significant dormancy alleviating effects in sweet cherry  
456 cultivars, similar to previous observations in hybrid aspen (*Populus tremula* × *Populus Tremuloides*;  
457 Rinne et al. 2011), Japanese apricot (*Prunus mume*; Zhuang et al. 2013) and peach (Donoho and Walker  
458 1957), but opposed to null or inhibitory effects on dormancy release previously reported in hybrid aspen  
459 and grapevine (Rinne et al. 2011, Zheng, et al. 2018). In addition, high levels of GA<sub>4</sub> and GA<sub>7</sub> were  
460 detected in sweet cherry flower buds, similarly to results obtained in pear (Ito et al. 2019), whereas GA<sub>1</sub>

461 and GA<sub>3</sub> were undetectable in the samples, contradictory to the high GA<sub>1</sub> and GA<sub>3</sub> levels recorded in  
462 grapevine and Japanese apricot buds during dormancy (Zhang et al. 2018, Zheng et al. 2018). These  
463 observations are consistent with the hypothesis that GAs act in a complex manner, with differential  
464 effects depending on concentrations and developmental phases, as discussed in Zheng et al. (Zheng et  
465 al. 2018). In addition, GA effects might be species or even cultivar-specific, with complex interactions  
466 with environmental factors, such as temperature or photoperiod. Further investigation on the regulation  
467 of the GA-related pathway during dormancy in sweet cherry, under contrasted environmental conditions,  
468 will bring key elements to the current hypotheses. Furthermore, given the complexity of GA  
469 quantification, it is possible that key GA dynamics might have been missed in the present study and  
470 therefore, expression of GA-pathway-related genes might be more reliable. Here, based on our results,  
471 we propose our hypotheses on GA signaling involving different transcriptional cascades during sweet  
472 cherry flower bud dormancy:

473 i) During predormancy stages (July to September), GA<sub>4</sub> and GA<sub>7</sub> content progressively increases,  
474 associated with an increase in *PavGA20ox1c* expression, and the activation of GA signaling, as revealed  
475 by the increased expression of GA-response genes *PavGASA2*, *6*, *b*, *c* and *d*. Enhanced GA content  
476 potentially triggers the expression of *PavGA2ox8c* to catalyze GA deactivation as part of the feedback  
477 regulation (Yamaguchi 2008). In Arabidopsis, proteins GASA4 and GASA6 are involved in flower  
478 development and cell elongation, respectively, in response to GA signaling (Roxrud et al. 2007, Zhong  
479 et al. 2015) therefore we can hypothesize that gibberellin signaling, mostly driven by *PavGA20ox1c* in  
480 this phase may control flower bud organogenesis and development.

481 ii) After endodormancy is induced, there is a marked increase in GA<sub>4</sub> and GA<sub>7</sub> contents. Gibberellin  
482 homeostasis seems to be actively controlled during endodormancy through enhanced expression of  
483 biosynthesis gene *PavGA3ox4* and deactivation genes *PavGA2ox8b* and *PavGA2ox8c*. Consistently, the  
484 absence of paclobutrazol effect on bud break suggest that GAs are synthesized prior to dormancy release.  
485 Interestingly, previous studies have shown that cellular transport is blocked during dormancy (Rinne et  
486 al. 2011, Tylewicz et al. 2018) and we can therefore hypothesize that although GAs may be present in  
487 the bud, their growth-promoting effect is physically inhibited. In agreement with acute GA deactivation,  
488 only one GA-response gene is activated during this phase, *PavGASA1a*, thus suggesting a very specific  
489 response. Expression for the five GA-related genes up-regulated during endodormancy sharply decrease  
490 during dormancy release, thus supporting the hypothesis that this is an endodormancy-specific  
491 regulation.

492 iii) As observed in the early cultivar ‘Cristobalina’, levels for GA<sub>4</sub> and GA<sub>7</sub> decrease during  
493 ecodormancy, associated with low, if not null, expression for *PavGA20ox1c* and *PavGA3ox4* synthesis  
494 genes, as well as *PavGA2ox8b*, *PavGA2ox8c*, *PavGA2ox* deactivation genes and *PavGID1B* receptor.  
495 Interestingly, the GA-response *PavGASA* genes and the DELLA gene *PavRGA1b* are markedly



496 activated during ecodormancy, thus suggesting that GA-stimulated pathways are up-regulated. Indeed,  
497 despite decreasing GA<sub>4</sub> and GA<sub>7</sub> levels during ecodormancy, GA-response pathways seem to be mostly  
498 activated when *GA2ox* genes are down-regulated after dormancy release so further investigation on the  
499 control of GA deactivation during dormancy could unravel a potential regulation by cold accumulation.  
500 In addition, bioactive GAs, including GA<sub>1</sub> and GA<sub>3</sub>, that were not detected in the current study might  
501 be key actors in the growth resumption stage of ecodormancy in sweet cherry. Acute GA response  
502 occurring during ecodormancy, including activation of *GASA* genes, was previously reported in  
503 grapevine (Zheng et al. 2018), oak (Ueno et al. 2013), pear (Yang et al. 2019) and Japanese apricot  
504 (Zhang et al. 2018). Despite the fact that DELLA genes' activity is mainly regulated by protein stability,  
505 the up-regulation of *PavRGA1b* is consistent with the GA response during ecodormancy, associated with  
506 a decrease in *PavGIDB* expression. These results suggest that the GA homeostasis, critical during active  
507 growth, is controlled in sweet cherry by the DELLA proteins, that target GA biosynthesis and receptor  
508 genes and impacts GA balance through a feedback regulation, as previously shown in Arabidopsis and  
509 rice (Gagne et al. 2002, Ueguchi-Tanaka et al. 2007, Zentella et al. 2007).

#### 510 **Dormancy depth is correlated with endogenous ABA content**

511 Exogenous application of ABA on the sweet cherry dormant bud showed that buds at this specific stage  
512 were not affected by ABA treatment, in contrast to the observation that ABA treatment had a significant  
513 effect on grapevine bud break (Zheng et al. 2015). However, as shown by the high expression of genes  
514 involved in ABA degradation, including *PavCYP707A2*, high catabolism ability during endodormancy  
515 might have limited the effect of exogenous ABA. It might also suggest that ABA response is saturated  
516 in the context of very high ABA levels during endodormancy, therefore limiting the effect of additional  
517 ABA. Nevertheless, we observed that dormancy release was triggered in buds treated with fluridone that  
518 inhibits ABA biosynthesis, as previously reported in pear (Yang et al. 2020), thus suggesting that high  
519 ABA levels may act to maintain dormancy. This was further confirmed by the observed elevated ABA  
520 levels correlated with endodormancy in both cultivars, as well as the differences in ABA levels between  
521 the early and late flowering cultivars. Our results are consistent with the hypothesis that dormancy is  
522 triggered and maintained when ABA levels are above a threshold, taking into account the potential  
523 heterogeneity within a population of flower buds. Bud dormancy may subsequently be released if ABA  
524 levels fall below the threshold. Consequently, such a dormancy release threshold would be reached  
525 earlier in the season for early cultivars with less ABA (Wen et al. 2016) or when ABA levels are lower  
526 due to various environmental conditions (Chmielewski et al. 2017). Recent reports have indeed shown  
527 how low or high levels of ABA closely drive the depth of dormancy by controlling the blockage of  
528 cellular transports (Tylewicz et al. 2018, Singh et al. 2019).

529 We show that during the predormancy and dormancy onset stages, ABA levels are correlated with an  
530 increase in the expression of *PavNCED9*, then *PavNCED3* genes in both cultivars. Consistently with  
531 elevated ABA levels, genes encoding ABA receptors (*PavPYL12*, 8), as well as ABA response genes,



532 are highly expressed during deep dormancy. One interesting result is that *PavNCED9* expression peak  
533 coincides with the highest ABA levels in October in ‘Cristobalina’ and in December in ‘Regina’,  
534 approximately two months before dormancy is released. This suggests that the deepest dormancy state  
535 might occur earlier in ‘Cristobalina’ than in ‘Regina’ and therefore question whether endodormancy is  
536 indeed induced simultaneously in both cultivars. Further physiological observations during the early  
537 stages of dormancy induction, including flower primordia developmental context (Fadón et al. 2018),  
538 could help better understanding the observed differences. Afterwards, genes involved in ABA  
539 degradation (*CYP707A*) are highly expressed during dormancy release and positively correlated with a  
540 decrease of ABA content. Similar results were reported in other *Prunus* species (Zhang et al. 2015,  
541 Wang et al. 2016, Tuan et al. 2017), thus supporting the hypothesis that ABA signaling pathways play  
542 a major role in the regulation of dormancy induction, maintenance and release.

543 Presently, a remaining question to elucidate is what drives the decrease in ABA levels around dormancy  
544 release. Which mechanisms are involved in the down-regulation of *PavNCEDs* and up-regulation of  
545 *PavCYP707As* through chill accumulation? Firstly, several reports indicate that ABA might regulate its  
546 own accumulation and high levels of ABA attained during endodormancy could up-regulate the  
547 expression of catabolic genes such as *PavCYP707A4*, leading to a global decrease in ABA content.  
548 Secondly, *DORMANCY-ASSOCIATED MADS-BOX (DAM)* genes have been strong candidates for a  
549 key role in dormancy promotion and maintenance (Rodriguez et al. 1994, Bielenberg et al. 2008). *DAM*  
550 genes are highly expressed during dormancy and their expression is inhibited by chill accumulation  
551 (Jiménez et al. 2010, Hao et al. 2015), but more interestingly, recent studies have highlighted the direct  
552 effect of *DAM* on the activation of ABA biosynthesis (Tuan et al. 2017, Yamane et al. 2019). Further *in*  
553 *vitro* assays suggest a potential regulation between CBF proteins and *DAM* promoters (Niu et al. 2015,  
554 Zhao et al. 2018), which could suggest that when *CBF* genes are transiently activated in response to low  
555 temperatures, they modulate the expression of *DAM* genes that subsequently upregulate *NCED* genes  
556 and ABA biosynthesis in the first stages of dormancy. However, this may not explain the inhibiting  
557 effect of prolonged cold temperatures on *DAM* genes expression and ABA levels. Subsequently, more  
558 similarly to mechanisms controlling vernalization in annual plants (Horvath 2009), chill accumulation  
559 may induce chromatin modifications that silences *DAM* genes (Leida et al. 2012, Ríos et al. 2014, de la  
560 Fuente et al. 2015) and inhibits ABA production, consistently with decreasing ABA levels observed as  
561 soon as January. Interestingly, a recent study conducted in hybrid aspen shows that chilling and long  
562 photoperiods induces a decrease in ABA levels, which subsequently drives the decrease in *SHORT*  
563 *VEGETATIVE PHASE-LIKE (SVL)* expression (Singh et al. 2018, 2019). *SVL* shows similarity to  
564 *SHORT VEGETATIVE PHASE (SVP)* and *DAM* genes and this mechanism suggests that ABA might  
565 also act on the expression of *DAM* genes. Regulation of *DAM* and ABA pathways by long term cold  
566 temperatures should be further investigated to better understand how temperature variations control  
567 dormancy progression in sweet cherry flower buds.

## 568 **A contrasted ABA synthesis and conjugation balance between early and late cultivars**

569 Overall, although the dynamics of expression for *PavNCED* and *PavCYP707A* genes effectively explain  
570 the increasing and decreasing pattern of ABA levels between dormancy induction and release, we further  
571 investigated whether they could account for the significant differences observed for ABA levels between  
572 the two cultivars. Contrasted expression patterns for *PavNCED3*, *PavCYP7074a* and *PavCYP7074c*  
573 were not sufficient to explain the noticeably contrasted ABA accumulation during endodormancy  
574 between the two cultivars. Differences in ABA catabolites between cultivars were also observed. While  
575 PA content followed the same pattern as ABA, DPA was particularly high during dormancy release,  
576 inversely correlated with the decreasing ABA levels. Interestingly, Weng and colleagues (Weng et al.  
577 2016) exposed the compensatory effect of PA under low ABA conditions, in which PA is recognized  
578 by ABA receptors (PYL5 and 2) allowing a supplementary growth inhibition effect. In sweet cherry,  
579 increased *PavCYP707A2* expression may explain the higher levels of PA during dormancy in ‘Regina’  
580 and might therefore result in even deeper dormancy by the inhibitory combination of ABA and PA.  
581 Since free ABA levels may be controlled through conjugation as well (El Kayal et al. 2011, Chmielewski  
582 et al. 2018, Liu and Sherif 2019), we investigated the conversion of ABA to ABA-GE and we found a  
583 *PavUGT71B6* gene characterized by strikingly higher expression levels for the early cultivar compared  
584 to the late cultivar. UGT71B6 orthologs in Arabidopsis and Adzuki bean act specifically for ABA  
585 conjugation into ABA-GE (Xu et al. 2002, Priest et al. 2006), so up-regulation of *PavUGT71B6*  
586 expression in ‘Cristobalina’ during dormancy may explain the higher content of ABA-GE. We can  
587 therefore hypothesize that the low ABA content in the early cultivar may be due to active catabolism of  
588 ABA to ABA-GE.

## 589 **Towards new phenology approaches based on molecular mechanisms**

590 Following our observations that ABA levels were correlated with dormancy status and that dynamics of  
591 expression for ABA synthesis and catabolism may explain the differences observed between cultivars,  
592 we have successfully modeled ABA content and dormancy behavior in three cultivars exhibiting  
593 contrasted dormancy release dates. Indeed, ABA had been proposed as an indicator for dormancy release  
594 in sweet cherry (Chmielewski et al. 2017) but to our knowledge, this is the first attempt to simulate  
595 dormancy onset and duration using molecular data. Only a small number of key genes regulating ABA  
596 were sufficient to account for all variations in ABA levels and dormancy progression overtime and  
597 between cultivars. However, although we could verify the model on dormancy release dates in one  
598 independent cultivar, additional experiments with precise ABA levels evaluation will be necessary to  
599 validate the actual prediction of ABA levels based on gene expression associated with the dormancy  
600 status in ‘Garnet’. In addition, previous analyses have shown that ABA levels are highly variables  
601 between years (Chmielewski et al. 2017) therefore further analyses are needed to explore and validate  
602 the current model.

603 Antagonistic actions of ABA and GA have been extensively studied in seed dormancy (Shu et al. 2018)  
604 and the ABA/GA ratio is often proposed as a determinant factor in the control of rest and growth  
605 responses, including dormancy release (Zhang et al. 2018). Therefore, integrating GA signaling into the  
606 bud dormancy model might be necessary to better account for the regulation of dormancy release. For  
607 example, it is possible that high GA levels around dormancy release play a role by overcoming the ABA-  
608 dependent growth inhibition. Interaction between GA and ABA pathways might also be critical in the  
609 response to environmental conditions during dormancy, including intertwined regulations of hormone  
610 biosynthesis (Shu et al. 2013, Yue et al. 2017). This was applied in a very innovative model for seed  
611 germination based on the endogenous hormone integration system (Topham et al. 2017). The hormonal  
612 balance between GA and ABA is regulated by endogenous and environmental signals towards the  
613 developmental switch that triggers termination of dormancy and germination. Accordingly, ON/OFF  
614 systems, like dormancy or flower initiation, can be modelled as developmental switches triggered in  
615 response to quantitative inputs after a threshold has been reached (Wilczek et al. 2009, Donohue et al.  
616 2015, Bassel 2016). In our current model, we propose a first step for mechanistic modelling of dormancy  
617 onset and release based on expression data and ABA quantification. The next steps, in addition to the  
618 integration of GA signaling and its crosstalk with ABA, will be to provide information on temperature-  
619 mediated control of the regulatory cascades. Recent research led on Arabidopsis, allowed by high-  
620 throughput sequencing techniques, has hastened the pace for the incorporation of molecular data into  
621 phenology models (Satake et al. 2013, Kudoh 2016, Antoniou-Kourouniotti et al. 2018, Nishio et al.  
622 2020), thus opening new roads for perennial studies.

## 623 **DATA AVAILABILITY**

624 RNA-seq data: Gene Expression Omnibus GSE130426

625 TPM data for the 81 genes analyzed in this work are available for all samples in the **supplementary**  
626 **datafile**

627

## 628 **SUPPLEMENTARY DATA**

629 **Figure S1** Chilling and dormancy status during the treatments with exogenous hormones and antagonist  
630 on sweet cherry cultivar ‘Fertard’

631 **Figure S2** Coverage of the mapped reads for each base of the sequences of ABA-related genes for the  
632 three sweet cherry cultivars

633 **Figure S3** Coverage of the mapped reads for each base of the sequences of GA-related genes for the  
634 three sweet cherry cultivars

635 **Figure S4** Effect of GAs, ABA and their inhibitor on the bud break percentage under forcing conditions

636 **Figure S5** Concentration ratio of ABA, ABA conjugates and GAs levels between ‘Regina’ and  
637 ‘Cristobalina’

638 **Figure S6** ABA levels predictions for the best models using different sets of biosynthesis and catabolism  
639 genes

640 **Figure S7** Transcriptional dynamics of genes involved in ABA synthesis and degradation in the flower  
641 buds of the sweet cherry cultivar ‘Garnet’

642 **Table S1** Description of the flower bud samples used for hormone quantification and RNA-seq and  
643 total number of mapped reads for RNA-seq data

644 **Table S2** Details of the genes related to ABA and GA pathways analyzed in the project

645 **Table S3** Differentially expressed genes

646 **Table S4** Parameters and residual sum of squares for the best models corresponding to the different  
647 gene sets tested to predict abscisic acid levels

648 **Supplementary Data File** Expression data in transcripts per million reads (TPM) for the genes  
649 analyzed in the project

650

## 651 **FUNDING**

652 Doctoral fellowship for RB was funded by INRAE and the Nouvelle-Aquitaine Region (AQUIPRU  
653 project 2014-1R20102-2971). CMI-Groupe Roullier and ANRT financed the CIFRE PhD fellowship  
654 for NV. Postdoctoral fellowship for ASLD was funded by the Nouvelle Aquitaine Region project 2018-  
655 1R20203 CerGen.

656

## 657 **ACKNOWLEDGEMENTS**

658 The authors would like to thank INRAE and the Aquitaine Region for funding the doctoral fellowship  
659 to RB, and CMI-Groupe Roullier and ANRT for allowing the work conducted by NV. The authors  
660 warmly thank Teresa Barreneche, H el ene Christmann, Jacques Joly and Lydie Fouilhaux, for collecting  
661 the branches and collaborating on the phenotyping. The authors thank the INRAE’s ‘*Prunus* Genetic  
662 Resources Center’ for preserving and managing the sweet cherry collections and the Fruit Experimental  
663 Unit of INRAE-Bordeaux (UEA) for growing the trees and managing the orchards. Figure 2 was  
664 modified from the original version published in Vimont et al. (2019), under copyright by BMC (Springer  
665 Nature Group).

## 666 **AUTHORS’ CONTRIBUTION**

667 BW, SC, ED and PAW designed the original research. NV produced and analyzed the transcriptional  
668 data under the supervision of SC. RB conducted the analysis on exogenous application. LLD provided  
669 the sweet cherry genome on which ASLD performed the mapping and count analysis of RNA-seq data.  
670 AS and NV performed the phytohormones extraction and quantification. MA, FJ and JCY supervised  
671 the phytohormones analyses. NV and BW wrote the manuscript with the assistance of all the authors.

672

## 673 REFERENCES

674 Ali N, Schwarzenberg A, Yvin JC, Hosseini SA (2018) Regulatory role of silicon in mediating  
675 differential stress tolerance responses in two contrasting tomato genotypes under osmotic stress.  
676 *Front Plant Sci* 9:1–16.

677 Anders S, Pyl PT, Huber W (2015) HTSeq-A Python framework to work with high-throughput  
678 sequencing data. *Bioinformatics* 31:166–169.

679 Antoniou-Kourounioli RL, Hepworth J, Heckmann A, Duncan S, Qüesta J, Rosa S, Säll T, Holm S,  
680 Dean C, Howard M (2018) Temperature Sensing Is Distributed throughout the Regulatory  
681 Network that Controls *FLC* Epigenetic Silencing in Vernalization. *Cell Syst* 7:643-655.e9.

682 Atkinson CJ, Brennan RM, Jones HG (2013) Declining chilling and its impact on temperate perennial  
683 crops. *Environ Exp Bot* 91:48–62.

684 Aubert D, Chevillard M, Dorne AM, Arlaud G, Herzog M (1998) Expression patterns of *GASA* genes  
685 in *Arabidopsis thaliana*: The *GASA4* gene is up-regulated by gibberellins in meristematic  
686 regions. *Plant Mol Biol* 36:871–883.

687 Bai S, Saito T, Sakamoto D, Ito A, Fujii H, Moriguchi T (2013) Transcriptome Analysis of Japanese  
688 Pear (*Pyrus pyrifolia* Nakai) Flower Buds Transitioning Through Endodormancy. *Plant Cell*  
689 *Physiol* 54:1132–1151.

690 Bassel GW (2016) To grow or not to grow. *Trends Plant Sci* 21:498–505.

691 Beauvieux R, Wenden B, Dirlwanger E (2018) Bud Dormancy in Perennial Fruit Tree Species : A  
692 Pivotal Role for Oxidative Cues. *Front Plant Sci* 9:1–13.

693 Bielenberg DG, Wang Y, Li Z, Zhebentyayeva T, Fan S, Reighard GL, Scorza R, Abbott AG (2008)  
694 Sequencing and annotation of the evergrowing locus in peach [*Prunus persica* (L.) Batsch]  
695 reveals a cluster of six MADS-box transcription factors as candidate genes for regulation of  
696 terminal bud formation. *Tree Genet Genomes* 4:495–507.

697 Bolger AM, Lohse M, Usadel B (2014) Trimmomatic: A flexible trimmer for Illumina sequence data.  
698 *Bioinformatics* 30:2114–2120.

- 699 Chmielewski F, Baldermann S, Götz K, Homann T, Gödeke K, Schumacher F, Huschek G, Rawel H  
700 (2018) Abscisic Acid Related Metabolites in Sweet Cherry Buds (*Prunus avium* L.). J Horticult 05.
- 701 Chmielewski F, Götz K, Homann T, Huschek G, Rawel H (2017) Identification of Endodormancy  
702 Release for Cherries (*Prunus Avium* L.) by Abscisic Acid and Sugars. J Horticult 04.
- 703 Chuine I, Bonhomme M, Legave J-M, García de Cortázar-Atauri I, Charrier G, Lacoïnte A, Améglio  
704 T (2016) Can phenological models predict tree phenology accurately in the future? The  
705 unrevealed hurdle of endodormancy break. Glob Chang Biol 22:3444–3460.
- 706 Chuine I, Régnière J (2017) Process-Based Models of Phenology for Plants and Animals. Annu Rev  
707 Ecol Evol Syst 48:159–82.
- 708 Cooke JEK, Eriksson ME, Junttila O (2012) The dynamic nature of bud dormancy in trees:  
709 environmental control and molecular mechanisms. Plant Cell Env 35:1707–1728.
- 710 Le Dantec L, Girollet N, Gouzy J, Sallet E, Carrère S, Fouché M, Quero-García J, Dirlwanger E  
711 (2020) Assembly and annotation of ‘Regina’ sweet cherry genome. V1. Portail Data INRAE.  
712 <https://doi.org/10.15454/KEW474>
- 713 Dobin A, Davis CA, Schlesinger F, Drenkow J, Zaleski C, Jha S, Batut P, Chaisson M, Gingeras TR  
714 (2013) STAR: Ultrafast universal RNA-seq aligner. Bioinformatics 29:15–21.
- 715 Donoho CWJ, Walker DR (1957) Effect of Gibberellic Acid on Breaking of Rest Period in Elberta  
716 Peach. Science (80- ) 126:1178–1179.
- 717 Donohue K, Burghardt LT, Runcie D, Bradford KJ, Schmitt J (2015) Applying developmental  
718 threshold models to evolutionary ecology. Trends Ecol Evol 30:66–77.
- 719 Eriksson ME, Hoffman D, Kaduk M, Mauriat M, Moritz T (2015) Transgenic hybrid aspen trees with  
720 increased gibberellin (GA) concentrations suggest that GA acts in parallel with FLOWERING  
721 LOCUS T2 to control shoot elongation. New Phytol 205:1288–1295.
- 722 Fadón E, Herrero M, Rodrigo J (2015) Flower development in sweet cherry framed in the BBCH  
723 scale. Sci Horticult 192:141–147.
- 724 Fadón E, Rodrigo J, Herrero M (2018) Is there a specific stage to rest? Morphological changes in  
725 flower primordia in relation to endodormancy in sweet cherry (*Prunus avium* L.). Trees  
726 32:1583–1594.
- 727 Finkelstein R (2013) Abscisic Acid Synthesis and Response. Arab B 11:e0166.
- 728 Fishman S, Erez A, Couvillon GA (1987a) The temperature dependence of dormancy breaking in  
729 plants: Mathematical analysis of a two-step model involving a cooperative transition. J Theor



- 730 Biol 124:473–483.
- 731 Fishman S, Erez A, Couvillon GA (1987b) The temperature dependence of dormancy breaking in  
732 plants: Computer simulation of processes studied under controlled temperatures. *J Theor Biol*  
733 126:309–321.
- 734 Gagne JM, Downes BP, Shiu S-H, Durski AM, Vierstra RD (2002) The F-box subunit of the SCF E3  
735 complex is encoded by a diverse superfamily of genes in Arabidopsis. *Proc Natl Acad Sci*  
736 99:11519–11524.
- 737 Haddad C, Arkoun M, Jamois F, Schwarzenberg A, Yvin JC, Etienne P, Laîné P (2018) Silicon  
738 promotes growth of *Brassica napus* L. And delays leaf senescence induced by nitrogen  
739 starvation. *Front Plant Sci* 9:1–13.
- 740 Hänninen H (1990) Modelling bud dormancy release in trees from cool and temperate regions. *Acta*  
741 *For Fenn* 213:1–47.
- 742 Hao X, Chao WS, Yang Y, Horvath DP (2015) Coordinated expression of *FLOWERING LOCUS T*  
743 and *DORMANCY ASSOCIATED MADS-BOX-like* genes in leafy spurge. *PLoS One* 10:1–18.
- 744 Heide OM, Prestrud AK (2005) Low temperature, but not photoperiod, controls growth cessation and  
745 dormancy induction and release in apple and pear. *Tree Physiol* 25:109–114.
- 746 Hoad G V (1983) Hormonal regulation of fruit-bud formation in fruit trees. *Acta Hort* 149:13–24.
- 747 Horvath DP (2009) Common mechanisms regulate flowering and dormancy. *Plant Sci* 177:523–531.
- 748 Howe GT, Horvath DP, Dharmawardhana P, Priest HD, Mockler TC, Strauss SH (2015) Extensive  
749 Transcriptome Changes During Natural Onset and Release of Vegetative Bud Dormancy in  
750 *Populus*. *Front Plant Sci* 6
- 751 Huerta-cepas J, Forslund K, Coelho LP, Szklarczyk D, Jensen LJ, von Mering C, Bork P (2017) Fast  
752 Genome-Wide Functional Annotation through Orthology Assignment by eggNOG-Mapper. *Mol*  
753 *Biol Evol* 34:2115–2122.
- 754 Huerta-cepas J, Szklarczyk D, Heller D, Hernandez-Plaza A, Forslund SK, Cook H, Mende DR,  
755 Letunic I, Rattei T, Jensen LJ, von Mering C, Bork P (2019) eggNOG 5.0: a hierarchical ,  
756 functionally and phylogenetically annotated orthology resource based on 5090 organisms and  
757 2502 viruses. *Nucleic Acids Res* 47:309–314.
- 758 Ito A, Tuan PA, Saito T, Bai S, Kita M, Moriguchi T (2019) Changes in Phytohormone Content and  
759 Associated Gene Expression Throughout the Stages of Pear (*Pyrus pyrifolia* Nakai) Dormancy.  
760 *Tree Physiol* tpz101

- 761 Jiménez S, Reighard GL, Bielenberg DG (2010) Gene expression of DAM5 and DAM6 is suppressed  
762 by chilling temperatures and inversely correlated with bud break rate. *Plant Mol Biol* 73:157–67.  
763 <http://www.ncbi.nlm.nih.gov/pubmed/20143130> (30 September 2013, date last accessed ).
- 764 Jochner S, Caffarra A, Menzel A (2013) Can spatial data substitute temporal data in phenological  
765 modelling? A survey using birch flowering. *Tree Physiol* 33:1256–1268.
- 766 Junttila O, Jensen E (1988) Gibberellins and photoperiodic control of shoot elongation in *Salix*.  
767 *Physiol Plant* 74:371–376.
- 768 El Kayal W, Allen CCG, Ju CJT, Adams E, King-Jones S, Zaharia LI, Abrams SR, Cooke JEK (2011)  
769 Molecular events of apical bud formation in white spruce, *Picea glauca*. *Plant Cell Environ*  
770 34:480–500.
- 771 Khalil-Ur-Rehman M, Sun L, Li CX, Faheem M, Wang W, Tao JM (2017) Comparative RNA-seq  
772 based transcriptomic analysis of bud dormancy in grape. *BMC Plant Biol* 17:1–11.
- 773 Kudoh H (2016) Molecular phenology in plants: In natura systems biology for the comprehensive  
774 understanding of seasonal responses under natural environments. *New Phytol* 210:399–412.
- 775 de la Fuente L, Conesa A, Lloret A, Badenes ML, Ríos G (2015) Genome-wide changes in histone H3  
776 lysine 27 trimethylation associated with bud dormancy release in peach. *Tree Genet Genomes*  
777 11:45.
- 778 Lakkis S, Trotel-Aziz P, Rabenoelina F, Schwarzenberg A, Nguema-Ona E, Clément C, Aziz A  
779 (2019) Strengthening Grapevine Resistance by *Pseudomonas fluorescens* PTA-CT2 Relies on  
780 Distinct Defense Pathways in Susceptible and Partially Resistant Genotypes to Downy Mildew  
781 and Gray Mold Diseases. *Front Plant Sci* 10:1–18.
- 782 Lang G, Early J, Martin G, Darnell R (1987) Endo-, para-, and ecodormancy: physiological  
783 terminology and classification for dormancy research. *Hort Sci* 22:371–377.
- 784 Leida C, Conejero A, Arbona V, Gómez-Cadenas A, Llácer G, Badenes ML, Ríos G (2012) Chilling-  
785 dependent release of seed and bud dormancy in peach associates to common changes in gene  
786 expression. *PLoS One* 7:e35777.
- 787 Leida C, Conesa A, Llácer G, Badenes ML, Ríos G (2012) Histone modifications and expression of  
788 *DAM6* gene in peach are modulated during bud dormancy release in a cultivar-dependent  
789 manner. *New Phytol* 193:67–80.
- 790 Li J, Xu Y, Niu Q, He L, Teng Y, Bai S (2018) Abscisic acid (ABA) promotes the induction and  
791 maintenance of pear (*Pyrus pyrifolia* white pear group) flower bud endodormancy. *Int J Mol Sci*  
792 19

- 793 Liu J, Sherif SM (2019) Hormonal Orchestration of Bud Dormancy Cycle in Deciduous Woody  
794 Perennials. *Front Plant Sci* 10:1–21.
- 795 Love MI, Huber W, Anders S (2014) Moderated estimation of fold change and dispersion for RNA-  
796 seq data with DESeq2. *Genome Biol* 15:1–21.
- 797 Nambara E, Marion-Poll A (2005) Abscisic Acid Biosynthesis and Catabolism. *Annu Rev Plant Biol*  
798 56:165–185.
- 799 Nishio H, Buzas DM, Nagano AJ, Iwayama K, Ushio M, Kudoh H (2020) Repressive chromatin  
800 modification underpins the long-term expression trend of a perennial flowering gene in nature.  
801 *Nat Commun* 11.
- 802 Niu Q, Li J, Cai D, Qian M, Jia H, Bai S, Hussain S, Liu G, Teng Y, Zheng X (2015) Dormancy-  
803 associated MADS-box genes and microRNAs jointly control dormancy transition in pear (*Pyrus*  
804 *pyrifolia* white pear group) flower bud. *J Exp Bot* 67:erv454.
- 805 Olsen JE (2010) Light and temperature sensing and signaling in induction of bud dormancy in woody  
806 plants. *Plant Mol Biol* 73:37–47.
- 807 Ophir R, Pang X, Halaly T, Venkateswari J, Lavee S, Galbraith D, Or E (2009) Gene-expression  
808 profiling of grape bud response to two alternative dormancy-release stimuli expose possible links  
809 between impaired mitochondrial activity, hypoxia, ethylene-ABA interplay and cell enlargement.  
810 *Plant Mol Biol* 71:403–423.
- 811 Or E, Belausov E, Popilevsky I, Ben Tal Y (2000) Changes in endogenous ABA level in relation to  
812 the dormancy cycle in grapevines grown in a hot climate. *J Hortic Sci Biotechnol* 75:190–194.
- 813 Petterle A, Karlberg A, Bhalerao RP (2013) Daylength mediated control of seasonal growth patterns in  
814 perennial trees. *Curr Opin Plant Biol* 16:301–306.
- 815 Powell LE (1987) The hormonal control of bud and seed dormancy in woody plants. In: Davies P (ed)  
816 *Plant Hormones and Their Role in Plant Growth and Development*. Martinus Nijhoff Publishers,  
817 Dordrecht, pp 539–552.
- 818 Priest DM, Ambrose SJ, Vaistij FE, Elias L, Higgins GS, Ross ARS, Abrams SR, Bowles DJ (2006)  
819 Use of the glucosyltransferase UGT71B6 to disturb abscisic acid homeostasis in *Arabidopsis*  
820 *thaliana*. *Plant J* 46:492–502.
- 821 Rinne PLH, Welling A, Vahala J, Ripel L, Ruonala R, Kangasjarvi J, van der Schoot C (2011)  
822 Chilling of dormant buds hyperinduces FLOWERING LOCUS T and recruits GA-inducible 1,3-  
823 beta-glucanases to reopen signal conduits and release dormancy in *Populus*. *Plant Cell* 23:130–  
824 146.

- 825 Ríos G, Leida C, Conejero A, Badenes ML (2014) Epigenetic regulation of bud dormancy events in  
826 perennial plants. *Front Plant Sci* 5:247.
- 827 Rodríguez-Gacio MDC, Matilla-Vázquez M a, Matilla AJ (2009) Seed dormancy and ABA signaling:  
828 the breakthrough goes on. *Plant Signal Behav* 4:1035–1049.
- 829 Rodriguez A, Sherman W, Scorza R, Wisniewski M, Okie WR (1994) ‘Evergreen’ peach, its  
830 inheritance and dormant behavior. *J Am Soc hort Sci* 119:789–792.
- 831 Rohde A, Bhalerao RP (2007) Plant dormancy in the perennial context. *Trends Plant Sci* 12:217–223.
- 832 Rohde A, Prinsen E, Rycke R De, Engler G, Montagu M Van, Boerjan W (2002) PtABI3 Impinges on  
833 the Growth and Differentiation of Embryonic Leaves during Bud Set in Poplar. *Plant Cell*  
834 14:1885–1901.
- 835 Rohde A, Storme V, Jorge V, Gaudet M, Vitacolonna N, Fabbrini F, Ruttink T, Zaina G, Marron N,  
836 Dillen S, Steenackers M, Sabatti M, Morgante M, Boerjan W, Bastien C (2011) Bud set in  
837 poplar--genetic dissection of a complex trait in natural and hybrid populations. *New Phytol*  
838 189:106–121.
- 839 Roxrud I, Lid SE, Fletcher JC, Schmidt EDL, Opsahl-Sorteberg HG (2007) GASA4, one of the 14-  
840 member Arabidopsis GASA family of small polypeptides, regulates flowering and seed  
841 development. *Plant Cell Physiol* 48:471–483.
- 842 Ruttink T, Arend M, Morreel K, Storme V, Rombauts S, Fromm J, Bhalerao RP, Boerjan W, Rohde A  
843 (2007) A molecular timetable for apical bud formation and dormancy induction in poplar. *Plant*  
844 *Cell* 19:2370–2390.
- 845 Satake A, Kawagoe T, Saburi Y, Chiba Y, Sakurai G, Kudoh H (2013) Forecasting flowering  
846 phenology under climate warming by modelling the regulatory dynamics of flowering-time  
847 genes. *Nat Commun* 4:2303.
- 848 Schwacke R, Ponce-soto GY, Krause K, Bolger AM, Arsova B, Hallab A, Gruden K, Stitt M, Bolger  
849 ME, Usadel B (2019) MapMan4: A Refined Protein Classification and Annotation Framework  
850 Applicable to Multi-Omics Data Analysis. *Mol Plant* 12:879–892.
- 851 Shafer N, Monson WG (1958) The Role of Gibberellic Acid in Overcoming Bud Dormancy in  
852 Perennial Weeds. I. Leafy Spurge (*Euphorbia esulta* L.) and Ironweed (*Vernonia Baldwini*  
853 Torr.). *Weeds* 6:172–178.
- 854 Shu K, Zhang H, Wang S, Chen M, Wu Y, Tang S, Liu C, Feng Y, Cao X, Xie Q (2013) ABI4  
855 Regulates Primary Seed Dormancy by Regulating the Biogenesis of Abscisic Acid and  
856 Gibberellins in Arabidopsis. *PLoS Genet* 9

- 857 Shu K, Zhou W, Yang W (2018) APETALA 2-domain-containing transcription factors: focusing on  
858 abscisic acid and gibberellins antagonism. *New Phytol* 217:977–983.
- 859 Singh RK, Maurya JP, Azeez A, Miskolczi P, Tylewicz S, Stojković K, Delhomme N, Busov V,  
860 Bhalerao RP (2018) A genetic network mediating the control of bud break in hybrid aspen. *Nat*  
861 *Commun* 9
- 862 Singh RK, Miskolczi P, Maurya JP, Bhalerao RP (2019) A Tree Ortholog of SHORT VEGETATIVE  
863 PHASE Floral Repressor Mediates Photoperiodic Control of Bud Dormancy. *Curr Biol* 29:128-  
864 133.e2.
- 865 Singh RK, Svystun T, Aldahmash B, Jönsson AM, Bhalerao RP (2016) Photoperiod- and  
866 temperature-mediated control of growth cessation and dormancy in trees: A molecular  
867 perspective. *New Phytol* 213:511–524.
- 868 Topham AT, Taylor RE, Yan D, Nambara E, Johnston IG, Bassel GW (2017) Temperature variability  
869 is integrated by a spatially embedded decision-making center to break dormancy in *Arabidopsis*  
870 seeds. *Proc Natl Acad Sci* 114:6629–6634.
- 871 Tuan PA, Bai S, Saito T, Ito A, Moriguchi T (2017) Dormancy-Associated MADS-Box (DAM) and  
872 the Abscisic Acid Pathway Regulate Pear Endodormancy Through a Feedback Mechanism. *Plant*  
873 *Cell Physiol* 58:1378–1390.
- 874 Tylewicz S, Petterle A, Marttila S, Miskolczi P, Azeez A, Singh RK, Immanen J, Mähler N, Hvidsten  
875 TR, Eklund DM, Bowman JL, Helariutta Y, Bhalerao RP (2018) Photoperiodic control of  
876 seasonal growth is mediated by ABA acting on cell-cell communication. *Science* (80- ) 360:212–  
877 215.
- 878 Ueguchi-Tanaka M, Nakajima M, Katoh E, Ohmiya H, Asano K, Saji S, Hongyu X, Ashikari M,  
879 Kitano H, Yamaguchi I, Matsuoka M (2007) Molecular Interactions of a Soluble Gibberellin  
880 Receptor, *GID1*, with a Rice *DELLA* Protein, *SLR1*, and Gibberellin. *Plant Cell Online*  
881 19:2140–2155.
- 882 Ueno S, Klopp C, Leplé JC, Derory J, Noirot C, Léger V, Prince E, Kremer A, Plomion C, Le Provost  
883 G (2013) Transcriptional profiling of bud dormancy induction and release in oak by next-  
884 generation sequencing. *BMC Genomics* 14:236.
- 885 Vimont N, Fouché M, Campoy JA, Tong M, Arkoun M, Yvin J-C, Wigge PA, Dirlwanger E, Cortijo  
886 S, Wenden B (2019) From bud formation to flowering: transcriptomic state defines the cherry  
887 developmental phases of sweet cherry bud dormancy. *BMC Genomics* 20:974. doi:
- 888 Vitasse Y, François C, Delpierre N, Dufrêne E, Kremer A, Chuine I, Delzon S (2011) Assessing the  
889 effects of climate change on the phenology of European temperate trees. *Agric For Meteorol*

- 890 151:969–980.
- 891 Wagner GP, Kin K, Lynch VJ (2012) Measurement of mRNA abundance using RNA-seq data: RPKM  
892 measure is inconsistent among samples. *Theory Biosci* 131:281–285.
- 893 Wang D, Gao Z, Du P, Xiao W, Tan Q, Chen X, Li L, Gao D (2016) Expression of ABA Metabolism-  
894 Related Genes Suggests Similarities and Differences Between Seed Dormancy and Bud  
895 Dormancy of Peach (*Prunus persica*). *Front Plant Sci* 6:1–17.
- 896 Weinberger J (1950) Chilling requirements of peach varieties. *Proc Am Soc Hortic Sci* 56:122–128.
- 897 Wen LH, Zhong WJ, Huo XM, Zhuang WB, Ni ZJ, Gao ZH (2016) Expression analysis of ABA- and  
898 GA-related genes during four stages of bud dormancy in Japanese apricot (*Prunus mume* Sieb. et  
899 Zucc.). *J Hortic Sci Biotechnol* 91:362–369.
- 900 Weng JK, Ye M, Li B, Noel JP (2016) Co-evolution of Hormone Metabolism and Signaling Networks  
901 Expands Plant Adaptive Plasticity. *Cell* 166:881–893.
- 902 Wilczek AM, Roe JL, Knapp MC, Cooper MD, Lopez-Gallego C, Martin LJ, Muir CD, Sim S, Walker  
903 A, Anderson J, Egan JF, Moyers BT, Petipas R, Giakountis A, Charbit E, Coupland G, Welch  
904 SM, Schmitt J, Franklin Egan J, Moyers BT, Petipas R, Giakountis A, Charbit E, Coupland G,  
905 Welch SM, Schmitt J (2009) Effects of genetic perturbation on seasonal life history plasticity.  
906 *Science* (80) 323:930–935.
- 907 Xu ZJ, Nakajima M, Suzuki Y, Yamaguchi I (2002) Cloning and Characterization of the Abscisic  
908 Acid-Specific Glucosyltransferase Gene from Adzuki Bean Seedlings. *Plant Physiol* 129:1285–  
909 1295.
- 910 Yamaguchi S (2008) Gibberellin Metabolism and its Regulation. *Annu Rev Plant Biol* 59:225–251.
- 911 Yamane H, Wada M, Honda C, Matsuura T, Ikeda Y, Hirayama T, Osako Y, Gao-Takai M, Kojima  
912 M, Sakakibara H, Tao R (2019) Overexpression of *Prunus* DAM6 inhibits growth, represses bud  
913 break competency of dormant buds and delays bud outgrowth in apple plants. *PLoS One* 14:1–  
914 24.
- 915 Yang Q, Niu Q, Tang Y, Ma Y, Yan X, Li J, Tian J, Bai S, Teng Y (2019) PpyGAST1 is potentially  
916 involved in bud dormancy release by integrating the GA biosynthesis and ABA signaling in  
917 ‘Suli’ pear (*Pyrus pyrifolia* White Pear Group). *Environ Exp Bot* 162:302–312.
- 918 Yang Q, Yang B, Li J, Wang Y, Tao R, Yang F, Wu X, Yan X, Ahmad M, Shen J, Bai S, Teng Y  
919 (2020) ABA-responsive ABRE-BINDING FACTOR3 activates DAM3 expression to promote  
920 bud dormancy in Asian pear. *Plant Cell Environ* 43:1360–1375.
- 921 Yu J, Conrad AO, Decroocq V, Zhebentyayeva T, Williams DE, Bennett D, Roch G, Audergon JM,



- 922 Dardick C, Liu Z, Abbott AG, Staton ME (2020) Distinctive Gene Expression Patterns Define  
923 Endodormancy to Ecodormancy Transition in Apricot and Peach. *Front Plant Sci* 11:1–24.
- 924 Yue C, Cao H, Hao X, Zeng J, Qian W, Guo Y, Ye N, Yang Y, Wang X (2017) Differential  
925 expression of gibberellin- and abscisic acid-related genes implies their roles in the bud activity-  
926 dormancy transition of tea plants. *Plant Cell Rep* 0:0.
- 927 Zentella R, Zhang Z-L, Park M, Thomas SG, Endo A, Murase K, Fleet CM, Jikumaru Y, Nambara E,  
928 Kamiya Y, Sun T (2007) Global Analysis of DELLA Direct Targets in Early Gibberellin  
929 Signaling in *Arabidopsis*. *Plant Cell* 19:3037–3057.
- 930 Zhang X, An L, Nguyen TH, Liang H, Wang R, Liu X, Li T, Qi Y, Yu F (2015) The cloning and  
931 functional characterization of peach *CONSTANS* and *FLOWERING LOCUS T* homologous genes  
932 PpCO and PpFT. *PLoS One* 10:1–16.
- 933 Zhang Z, Zhuo X, Zhao K, Zheng T, Han Y, Yuan C, Zhang Q (2018) Transcriptome Profiles Reveal  
934 the Crucial Roles of Hormone and Sugar in the Bud Dormancy of *Prunus mume*. *Sci Rep* 8:1–15.
- 935 Zhao K, Zhou Y, Ahmad S, Yong X, Xie X, Han Y, Li Y, Sun L, Zhang Q (2018) PmCBFs  
936 synthetically affect PmDAM6 by alternative promoter binding and protein complexes towards  
937 the dormancy of bud for *Prunus mume*. *Sci Rep* 8:4527.
- 938 Zheng C, Acheampong AK, Shi Z, Halaly T, Kamiya Y, Ophir R, Galbraith DW, Or E (2018) Distinct  
939 gibberellin functions during and after grapevine bud dormancy release. *J Exp Bot* 69:1635–1648.
- 940 Zheng C, Acheampong AK, Shi Z, Mugzech A, Halaly-Basha T, Sun Y, Colova V, Mosquna A, Ophir  
941 R, Galbraith DW, Or E (2018) Abscisic Acid Catabolism Enhances Dormancy Release of  
942 Grapevine Buds. *Plant Cell Environ* 41:2490–2503.
- 943 Zheng C, Halaly T, Acheampong AK, Takebayashi Y, Jikumaru Y, Kamiya Y, Or E (2015) Abscisic  
944 acid (ABA) regulates grape bud dormancy, and dormancy release stimuli may act through  
945 modification of ABA metabolism. *J Exp Bot* 66:1527–1542.
- 946 Zhong W, Gao Z, Zhuang W, Shi T, Zhang Z, Ni Z (2013) Genome-wide expression profiles of  
947 seasonal bud dormancy at four critical stages in Japanese apricot. *Plant Mol Biol* 83:247–64.
- 948 Zhong C, Xu H, Ye S, Wang S, Li L, Zhang S, Wang X (2015) AtGASA6 Serves as an Integrator of  
949 Gibberellin-, Abscisic Acid- and Glucose-Signaling during Seed Germination in *Arabidopsis*.  
950 *Plant Physiol* 169:pp.00858.2015.
- 951 Zhu Y, Li Y, Xin D, Chen W, Shao X, Wang Y, Guo W (2015) RNA-Seq-based transcriptome  
952 analysis of dormant flower buds of Chinese cherry (*Prunus pseudocerasus*). *Gene* 555:362–376..
- 953 Zhuang W, Gao Z, Wang L, Zhong W, Ni Z, Zhang Z (2013) Comparative proteomic and

954 transcriptomic approaches to address the active role of GA4 in Japanese apricot flower bud  
955 dormancy release. *J Exp Bot* 64:4953–4966.  
956
