1 **Title: Hormonal balance finely tunes dormancy status in sweet cherry flower buds**

2 **Running head: ABA and GA control sweet cherry bud dormancy**

3 Noémie Vimont<sup>1,2,3</sup>, Adrian Schwarzenberg<sup>2</sup>, Mirela Domijan<sup>4</sup>, Rémi Beauvieux<sup>1</sup>, Mustapha Arkoun<sup>2</sup>,  
4 Frank Jamois<sup>2</sup>, Jean-Claude Yvin<sup>2</sup>, Sandra Cortijo<sup>3</sup>, Philip A. Wigge<sup>5</sup>, Elisabeth Dirlewanger<sup>1</sup>,  
5 Bénédicte Wenden<sup>1</sup>

6 <sup>1</sup>INRAE, Univ. Bordeaux, UMR 1332 BFP, F-33140 Villenave d'Ornon, France; <sup>2</sup>Agro Innovation International - Centre  
7 Mondial d'Innovation - Groupe Roullier, 35400 St Malo, France; <sup>3</sup>The Sainsbury Laboratory, University of Cambridge,  
8 Cambridge CB2 1LR, United Kingdom; <sup>4</sup>Dept. of Mathematical Sciences, University of Liverpool, Liverpool L69 7ZL,  
9 United Kingdom; <sup>5</sup>Leibniz-Institute für Gemüse- und Zierpflanzenbau (IGZ), Plant Adaptation, Grossbeeren, Germany

10 **Author for correspondence:**

11 Bénédicte Wenden  
12 INRAE UMR 1332 BFP  
13 71 avenue Edouard Bourlaux CS20032  
14 33882 Villenave d'Ornon Cedex, France  
15 Tel: +33 557122549  
16 benedicte.wenden@inra.fr

17

18 **ABSTRACT**

19 In temperate trees, optimal timing and quality of flowering directly depend on adequate winter dormancy  
20 progression, regulated by a combination of chilling and warm temperatures. Physiological, genetic and  
21 functional genomic studies have shown that hormones play a key role in bud dormancy establishment,  
22 maintenance and release. We combined physiological, transcriptional analyses, quantification of  
23 abscisic acid (ABA) and gibberellins (GAs), and modelling to further elucidate how these signaling  
24 pathways control dormancy progression in the flower buds of two sweet cherry cultivars.

25 Our results demonstrated that GA-associated pathways have distinct functions and may differentially  
26 regulate dormancy. In addition, ABA levels rise at the onset of dormancy, associated with enhanced  
27 expression of ABA biosynthesis *PavNCE*D genes, and decreased prior to dormancy release. Following  
28 the observations that ABA levels are strongly linked with dormancy depth, we identified *PavUG71B6*,  
29 a sweet cherry *UDP-GLYCOSYLTRANSFERASE* gene that up-regulates active catabolism of ABA to  
30 ABA-GE in the early cultivar. Subsequently, we successfully modelled ABA content and dormancy  
31 behavior in three cultivars based on the expression of a small set of genes regulating ABA levels. These  
32 results underscore the central role of ABA and GA pathways in the control of dormancy progression  
33 and open up new perspectives for the development of molecular-based phenological modelling.

34 **KEY WORDS:** Abscisic acid, bud dormancy, gibberellic acid, hormones, modelling, *Prunus avium* L.

35

## 36 INTRODUCTION

37 Perennial plants have evolved strategies that enhance survival under the various environmental stresses  
38 they face during their growth and reproductive cycles. Among them, dormancy is a quiescent phase that  
39 protects meristematic and reproductive tissues from freezing damage. In temperate trees, the transition  
40 from active growth to dormancy is often triggered by decreasing photoperiod and/or temperatures  
41 depending on the species (Heide and Prestrud 2005, Rohde et al. 2011, Petterle et al. 2013, Singh et al.  
42 2016). Subsequently, the bud dormancy process relies on the integration of cold and warm temperatures  
43 between endodormancy, when buds are unable to resume growth even under favorable conditions, and  
44 ecodormancy, when bud development is inhibited by unfavorable conditions until optimal growth  
45 temperatures and photoperiod are met (Lang et al. 1987). In the current context of climate change,  
46 temperate trees are affected by contradictory effects during the dormancy period and shifts in  
47 phenological phases are observed: longer growing season and insufficient chilling during winter, both  
48 effects potentially having dramatic impact on growth and production (Vitasse et al. 2011, Atkinson et  
49 al. 2013, Jochner et al. 2013). Dormancy progression and control by temperature and photoperiod in  
50 perennial plants have been a focus for decades and physiological, genetic and functional genomic studies  
51 have shed some light onto the mechanisms underlying dormancy control in deciduous trees and other  
52 perennial plants (Cooke et al. 2012, Ríos et al. 2014, Beauvieux et al. 2018). Bud dormancy is controlled  
53 by a complex array of signaling pathways that integrate endogenous and environmental cues towards a  
54 rest/growth decision. Effort to synthesize the available knowledge and data into modelling approaches  
55 have led to the development of phenological models based on the dormancy regulation by temperature  
56 and photoperiod (Chuine et al. 2016, Chuine and Régnière 2017). However, process-based models of  
57 bud dormancy have not changed substantially since 1990 (Hänninen 1990) and the current predictive  
58 models rely on very little information about involved mechanisms. Conceptual models for dormancy  
59 progression have been proposed based on interactions between respiratory stresses, ethylene and  
60 abscisic acid (ABA), which in turn activate gibberellins (GA)-mediated growth through up-regulation  
61 of *FLOWERING LOCUS T (FT)* expression and resumption of intercellular transport (Ophir et al. 2009,  
62 Rinne et al. 2011).

63 The major role of hormones in the regulation of bud growth cessation, dormancy and activity resumption  
64 has been extensively discussed (e.g. (Cooke et al. 2012, Beauvieux et al. 2018, Liu and Sherif 2019).  
65 Seed and bud dormancy show common features in terms of hormonal control (Powell 1987, Leida,  
66 Conejero, et al. 2012, Wang et al. 2016) and GA and ABA balance is often involved in the integration  
67 of internal and external cues to control plant growth (Rodríguez-Gacio et al. 2009, Finkelstein 2013,  
68 Shu et al. 2018): GAs promote growth, whereas ABA promotes dormancy. Multiple physiological and  
69 transcriptomic studies have indeed proposed a central role for ABA in the repression of bud activity  
70 during dormancy. ABA would function as a signal in response to autumn short days and decreasing  
71 temperatures to induce dormancy onset (Rohde et al. 2002, Rohde and Bhalerao 2007, Ruttink et al.

72 2007, Wang et al. 2016, Tuan et al. 2017, Li et al. 2018, Tylewicz et al. 2018). Strong correlation was  
73 further shown between ABA and dormancy depth with high ABA levels detected during endodormancy,  
74 followed by a decrease in endogenous ABA content during the transition from endodormancy to  
75 ecodormancy (Or et al. 2000, Zheng et al. 2015, Wang et al. 2016, Wen et al. 2016, Chmielewski et al.  
76 2017, Li et al. 2018, Zhang et al. 2018, Yamane et al. 2019). Recently, ABA content has been proposed  
77 as a determining factor to assess dormancy status in sweet cherry (Chmielewski et al. 2017). Recent  
78 transcriptomic analyses of genes involved in the precise balance between biosynthesis and catabolism  
79 modulating ABA levels have further defined the involvement of ABA in bud dormancy. Indeed,  
80 expression patterns for 9-cis epoxycarotenoid dioxygenases (*NCED*), that catalyze the critical step for  
81 ABA biosynthesis, and *CYP707A*, encoding cytochrome P450 monooxygenases that inactivate ABA  
82 into 8'-hydroxy ABA, as well as ABA signaling genes, support ABA involvement in bud dormancy  
83 induction and maintenance (Fig. 1a) (Nambara and Marion-Poll 2005, Bai et al. 2013, Zhong et al. 2013,  
84 Zhu et al. 2015, Wang et al. 2016, Khalil-Ur-Rehman et al. 2017, Li et al. 2018, Zhang et al. 2018,  
85 Zheng et al. 2018). Similarly, until recently, most of the knowledge gathered on the behavior of the GA  
86 pathway during dormancy had been obtained in seeds but reports published in the last years have shed  
87 some light on GA regulation throughout bud dormancy in perennial plants. Studies have suggested a  
88 major role for GAs in maintaining growth before the induction of dormancy (Junttila and Jensen 1988,  
89 Ruttink et al. 2007, Olsen 2010, Eriksson et al. 2015, Singh et al. 2016) and promoting growth during  
90 ecodormancy (Wen et al. 2016, Zhang et al. 2018). Interestingly, GA treatments have a controversial  
91 effect on dormancy and bud break as shown in various perennial species since GA application may  
92 substitute for chilling (Shafer and Monson 1958, Rinne et al. 2011, Zhuang et al. 2013), or have delaying  
93 effects on shoot growth and bud break (Hoad 1983, Zheng et al. 2018), suggesting distinct gibberellin  
94 functions during dormancy. Although transcriptomic results for *GA2ox*, *GA3ox* and *GA20ox* vary  
95 between studies and therefore suggest complex and distinct functions, general patterns could be  
96 identified: expression for GA biosynthesis genes *GA 20-oxidases (GA20ox)* and *GA 3-oxidases (GA3ox)*  
97 decreases during dormancy induction then increases after dormancy release and during ecodormancy  
98 while GA deactivation *GA 2-oxidases (GA2ox)* genes are up-regulated during endodormancy and  
99 inhibited after endodormancy is released (Fig. 1b; Yamaguchi 2008, Bai et al. 2013, Zhong et al. 2013,  
100 Zhu et al. 2015, Wen et al. 2016, Khalil-Ur-Rehman et al. 2017, Zhang et al. 2018, Zheng et al. 2018).

101 In this study we explored potential hormonal markers of dormancy using a combination of physiological  
102 and transcriptomic analyses and a new modelling approach. We have focused on the involvement of GA  
103 and ABA pathways in sweet cherry flower bud dormancy. We examined the effect of exogenous GA  
104 and ABA on dormancy status and monitored endogenous contents for GAs and ABA and its metabolites,  
105 as well as the expression of genes related to ABA and GA metabolism throughout flower bud dormancy  
106 for two cultivars with contrasted dormancy release dates. Following our findings on hormonal control

107 of dormancy, we propose a mathematical model that incorporates the effect of key genes on the  
 108 dynamics of ABA to estimate dormancy status.

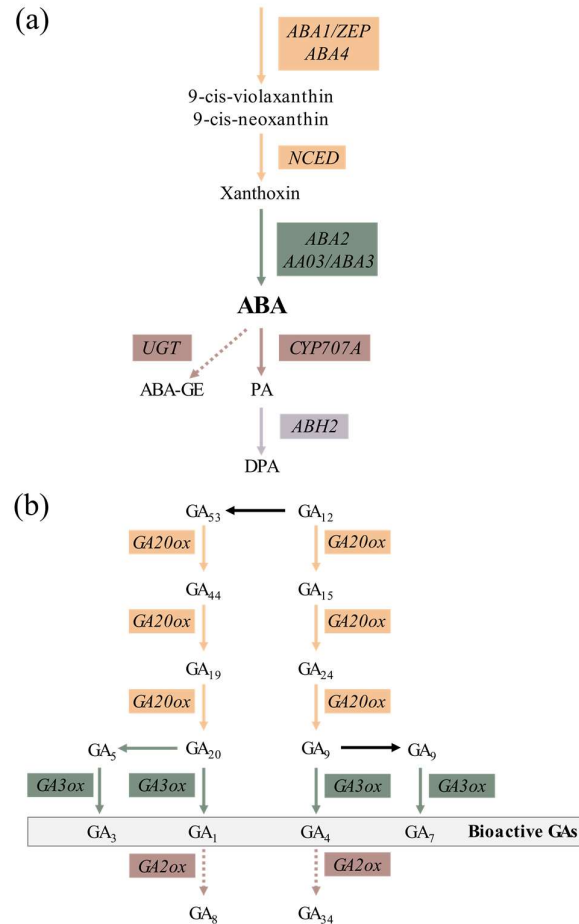

**Figure 1 Biosynthesis and catabolism pathway for ABA and GAs.** (a) ABA is synthesized through the action of five enzymes: zeaxanthin epoxidase (ZEP/ABA1), ABA-deficient4 (ABA4), 9-cis epoxy-carotenoid dioxygenase (NCED), alcohol dehydrogenase (ABA2) and short-chain dehydrogenase/reductase (AAO3/ABA3). ABA is mainly inactivated by ABA 8'-hydroxylase-catalyzed conversion to 8'-hydroxy ABA by cytochrome P450 monooxygenases, encoded by *CYP707A* (Nambara and Marion-Poll, 2005). 8'-hydroxy ABA is then spontaneously converted to phaseic acid (PA), which is further catabolized to dihydrophaseic acid DPA by a PA reductase (PAR) encoded by *ABA HYPERSENSITIVE2 (ABH2)*. ABA can be conjugated with glucose to inactive ABA-glucose ester (ABA-GE) by UDP-glycosyltransferases (UGT) (Dietz et al., 2000). (b) Bioactive GAs (GA<sub>1</sub>, GA<sub>3</sub>, GA<sub>4</sub> and GA<sub>7</sub>) are synthesized by GA 20-oxidases (GA20ox) and GA 3-oxidases (GA3ox) and catabolized by GA 2-oxidases (GA2ox) (Yamaguchi, 2008). ABA: Abscisic acid; GA: Gibberellic acid.

## 109 MATERIALS AND METHODS

### 110 Plant material

111 Samples were collected from three different sweet cherry cultivars (*Prunus avium* L.) having very early,  
 112 early and late flowering dates (respectively, 'Cristobalina', 'Garnet' and 'Regina'). Trees are grown in  
 113 an orchard located at the Fruit Experimental Unit of INRA in Bourran, South West of France (44° 19'  
 114 56" N, 0° 24' 47" E) under standard agricultural practices. During the sampling season (July 2015 to

115 March 2016), a mix of randomly chosen flower buds (equivalent to a 2 mL volume) were sampled at  
116 ten time points spanning the entire period of bud development (Fig. 2a) for phytohormone quantification  
117 (for ‘Cristobalina’ and ‘Regina’) and RNA-seq analysis (for the three cultivars). Flower buds were  
118 harvested from branches of three (‘Cristobalina’ and ‘Garnet’) or two different trees (‘Regina’). A total  
119 of 29, 31 and 21 samples were analyzed for ‘Cristobalina’, ‘Garnet’ and ‘Regina’ respectively. Details  
120 are available in Table S1 (Supplementary file at *Tree Physiology* online). Upon harvesting, buds were  
121 flash frozen in liquid nitrogen and stored at -80°C prior to performing RNA-seq. Average daily  
122 temperatures were recorded by an on-site weather station.

123 In addition, for the exogenous application of hormones, branches were collected from the late flowering  
124 sweet cherry cultivar ‘Fertard’. Trees were grown in an orchard located at the Fruit Experimental Unit  
125 of INRA in Toulence, South West of France (48° 51' 46" N, 2° 17' 15" E) under standard agricultural  
126 practices.

### 127 **Measurements of bud break and estimation of the dormancy release date**

128 Measurements for the dormancy stages were performed on randomly chosen branches cut every two  
129 weeks from November 16th 2015 to April 4th 2016 for ‘Cristobalina’, ‘Garnet’, ‘Regina’ and ‘Fertard’,  
130 and between November 21st 2017 and April 4th 2018 for ‘Fertard’. Branches were incubated in water  
131 pots placed in a growth chamber (25°C, 16h light/ 8h dark, 60-70% humidity). The water was replaced  
132 every 3-4 days. After ten days under these forcing conditions, the percentage of bud break, i.e. flower  
133 buds at BBCH stage 53 (Fadón et al. 2015), as illustrated in Fig. S1a, was recorded. The date of  
134 dormancy release was estimated when at least 50% of the flower buds were at the BBCH stage 53 or  
135 higher after ten days under forcing conditions.

### 136 **Treatments with exogenous hormones and antagonists**

137 To investigate the effects of GA and ABA on dormancy, five branches per modality were randomly  
138 harvested from ten ‘Fertard’ dormant trees on January 19th 2016 and January 29th 2018 (Fig. S1;  
139 Supplementary file at *Tree Physiology* online). The cherry dormant buds were treated with 5 µM GA<sub>3</sub>  
140 (Sigma-Aldrich, ref. 48870), 5 µM GA<sub>4</sub> (Sigma-Aldrich, ref. G7276), 400 µM ABA (Sigma-Aldrich,  
141 ref. A1049), 300 µM paclobutrazol (Sigma-Aldrich, ref. 46046), an inhibitor of the GA pathway, and 5  
142 µM fluridone (Sigma-Aldrich, ref. 45511), an inhibitor of the ABA pathway.

143 All chemicals and a water control were freshly prepared to the desired concentrations in 0.5% of  
144 surfactant (“Calanque”, Action Pin, Castets, France) to ensure the penetration of active molecules  
145 through the bud scales. Chemicals were sprayed on buds under a fume-hood and branches were left  
146 several minutes to allow them to dry. Branches were then transferred in the growth chamber (25°C, 16h  
147 light/ 8h dark, 60-70% humidity) in pots containing water. Bud break measurements were performed on  
148 flower buds as mentioned above.

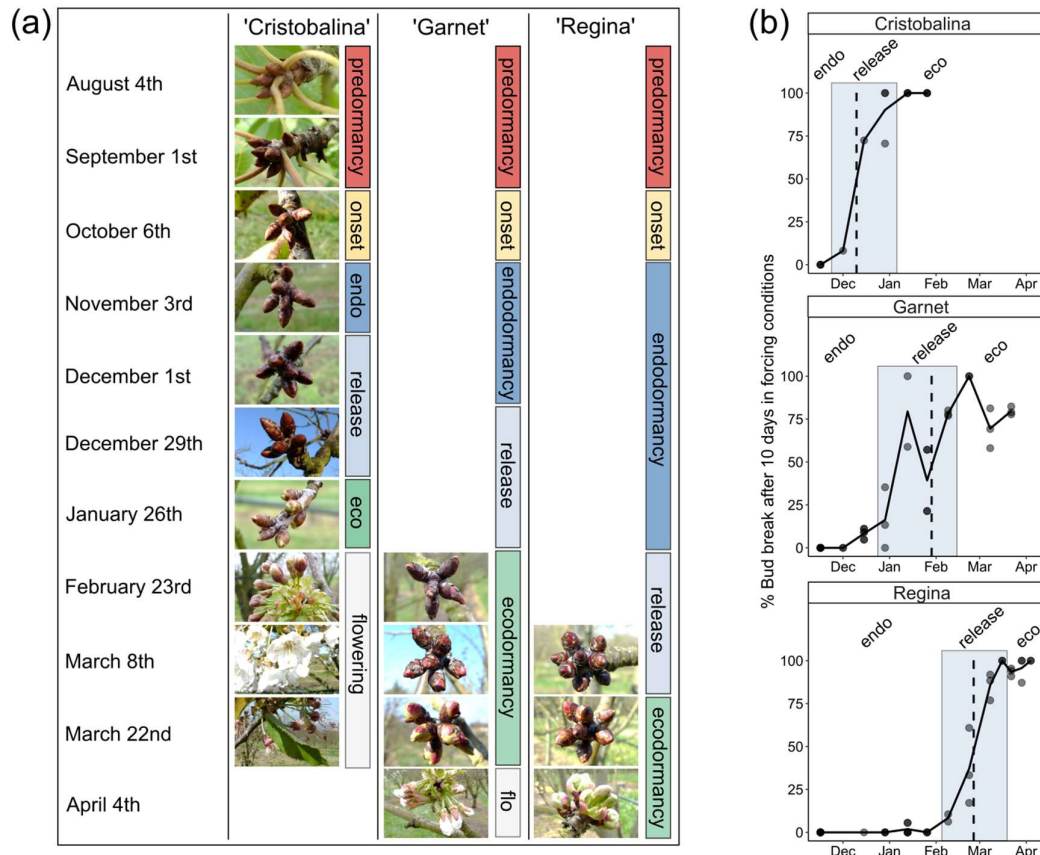

**Figure 2 Dormancy status defined for the three sweet cherry cultivars.** (a) bud stages at the sampling dates and the corresponding dormancy status as defined in the current study; (b) Evaluation of bud break percentage under forcing conditions was carried out for three sweet cherry cultivars displaying very early, early and late flowering dates: 'Cristobalina', 'Garnet' and 'Regina' respectively. The dotted line corresponds to the dormancy release dates, estimated at 50% of bud break after ten days under forcing conditions. Dots indicate the data points for the biological replicates.

149

## 150 Phytohormones extraction

151 For each sample (see Table S1; Supplementary file at *Tree Physiology* online), 10 mg of frozen  
 152 pulverised flower buds were weighed in a 2 mL tube. The extraction was carried out as previously  
 153 described (Ali et al. 2018, Haddad et al. 2018, Lakkis et al. 2019) by adding 1 mL of cold 70% MeOH  
 154 / 29% H<sub>2</sub>O / 1.0% formic acid, containing isotopically labelled internal standards. Then, the tubes were  
 155 stirred at room temperature for 30 min and centrifuged (5427R, Eppendorf) at 16,000 rpm for 20 minutes  
 156 at 4°C. The supernatant of each tubes were transferred into new tubes and evaporated to dryness using  
 157 a Turbovap LV system (Biotage, Sweden). The dried extracts were dissolved with 1 mL of a 2% formic  
 158 acid solution. The resuspended extracts were purified using a solid phase extraction (SPE) Evolute  
 159 express ABN 1ml-30 mg (Biotage, UK). The eluate was evaporated to dryness and resuspended in 200  
 160 µL of 0.1% formic acid before analysis.

## 161 Phytohormones quantification



162 ABA and conjugates (ABA-GE, PA, DPA) and GAs (GA<sub>1</sub>, GA<sub>3</sub>, GA<sub>4</sub>, GA<sub>7</sub>) were quantified by UHPLC-  
163 MS/MS as previously described (Lakkis et al. 2019). ABA, ABA-GE, gibberellins (GA<sub>4</sub>, GA<sub>7</sub>), [<sup>2</sup>H<sub>6</sub>]-  
164 ABA, and [<sup>2</sup>H<sub>2</sub>]-GA<sub>4</sub> were purchased from OlchemIn (Olomouc, Czech Republic). DPA, PA, [<sup>2</sup>H<sub>3</sub>]-  
165 dihydrophaseic acid (D-DPA), and [<sup>2</sup>H<sub>3</sub>]-phaseic acid (D-PA) were purchased from National Research  
166 Council Canada (NRC, Saskatoon, Canada). Phytohormones were analyzed by an UHPLC-MS/MS  
167 system. The separation and detection were achieved using a Nexera X2 UHPLC system (Shimadzu,  
168 Japan) coupled to a QTrap 6500+ mass spectrometer (Sciex, Canada) equipped with an electrospray  
169 (ESI) source. Phytohormones separation was carried out by injecting 2 µL into a Kinetex Evo C18 core-  
170 shell column (100 x 2.1mm, 2.6µm, Phenomenex, USA) at a flow rate of 0.7 mL/min, and the column  
171 oven was maintained at 40°C. The mobile phases were composed of solvent A Milli-Q water (18 MΩ,  
172 Millipore, USA) containing 0.1% formic acid (LCMS grade, Fluka analytics, Germany), and solvent B  
173 acetonitrile LCMS grade (Fisher Optima, UK) containing 0.1% formic acid. The gradient elution started  
174 with 1% B, 0.0-5.0 min 60% B, 5.0-5.5 min 100% B, 5.5-7.0 min 100 % B, 7.0-7.5 min 1% B, and 7.5-  
175 9.5 min 1% B. The ionization voltage was set to 5kV for positive mode and -4.5 kV for negative mode  
176 producing mainly [M+H]<sup>+</sup> and [M-H]<sup>-</sup> respectively. The analysis was performed in scheduled multiple  
177 reaction monitoring (MRM) mode in positive and negative mode simultaneously with a polarity  
178 switching of 5 ms. All quantitative data were processed using MultiQuant software V 3.0.2 (Sciex,  
179 Canada). GA<sub>1</sub>, GA<sub>3</sub> were not detected in the samples.

## 180 RNA extraction and library preparation

181 Total RNA was extracted from 50-60 mg of frozen and pulverised flower buds (see Table S1 for the  
182 detailed sample list) using RNeasy Plant Mini kit (Qiagen) with minor modification (1.5% PVP-40 was  
183 added in the RLT buffer). RNA quality was evaluated using Tapestation 4200 (Agilent Genomics). Only  
184 samples with RNA integrity number equivalent (RINe) superior or equivalent to 8.5 were used for RNA-  
185 seq. Library preparation was performed with 1 µg of total RNA using the TruSeq Stranded mRNA  
186 Library Prep Kit High Throughput (96 samples, 96 indexes, Illumina cat. no. RS-122-2103). DNA  
187 quality from libraries was evaluated using Tapestation 4200 (Agilent Genomics). The libraries were  
188 sequenced on a NextSeq500 (Illumina), at the Sainsbury Laboratory Cambridge University (SLCU),  
189 using paired-end sequencing of 75 bp in length.

## 190 Mapping and differential expression analysis

191 The raw reads obtained from the sequencing were analysed using several publicly available software  
192 and in-house scripts. The quality of reads was assessed using FastQC  
193 ([www.bioinformatics.babraham.ac.uk/projects/fastqc/](http://www.bioinformatics.babraham.ac.uk/projects/fastqc/)) and possible adaptor contaminations and low  
194 quality trailing sequences were removed using Trimmomatic (Bolger et al. 2014). Trimmed reads were  
195 mapped to the peach (*Prunus persica* (L.) Batsch) reference genome v2.0 (Verde et al. 2017) using  
196 Tophat (Trapnell et al. 2009) and possible optical duplicates were removed using Picard tools

197 (<https://github.com/broadinstitute/picard>). For the number of mapped reads in each sample, please refer  
198 to Table S1 (Supplementary file at *Tree Physiology* online). For each gene, Transcripts Per Million  
199 (TPM) were calculated (Wagner et al. 2012). TPM for the genes analysed in this study are available in  
200 the supplementary data file at *Tree Physiology* online. For the differential expression analysis, genes  
201 were first filtered based on their average expression in all samples for ‘Cristobalina’ and ‘Regina’  
202 (average TPM > 4) and their variation coefficient  $C_v$  ( $C_v > 0.3$ ) calculated as:

$$203 \quad C_v = \frac{\sigma}{\mu}$$

204 where  $\sigma$  and  $\mu$  are the standard deviation and mean values, respectively, for the TPM counts in all  
205 samples for ‘Cristobalina’ and ‘Regina’. Then, differentially expressed genes (DEGs) for each  
206 combination of dormancy stages (pre-dormancy, endodormancy, dormancy breaking and ecodormancy)  
207 were assessed using DESeq2 R Bioconductor package (Love et al. 2014), in the statistical software R (R  
208 Core Team 2018), on filtered data. Genes with an adjusted  $p$ -value ( $\text{padj}$ ) < 0.05 (Benjamini-Hochberg  
209 multiple testing correction method), in at least one of the comparisons, were assigned as DEGs (Table  
210 S2).

### 211 **Candidate gene identification**

212 We selected and investigated genes involved in the hormonal signaling pathways from predicted  
213 functions available for the peach genes based on pairwise sequence comparison (blastx algorithm against  
214 various protein databases) with *Arabidopsis thaliana* proteins (Verde et al. 2017);  
215 <https://www.rosaceae.org/analysis/154>). Genes were identified in the database by key words and gene  
216 names from the literature. Details on the studied genes are available in Table S3 (Supplementary file at  
217 *Tree Physiology* online).

218

### 219 **Modelling**

220 In order to explore the differences in the expression of ABA in the two cultivars, ‘Cristobalina’ and  
221 ‘Regina’, we took a mathematical modelling approach. We constructed a model incorporating  
222 information from the genes involved in the ABA signalling pathway.

223 Since NCEDs and CYP707As and UGT have been implicated in the production and degradation of  
224 ABA, respectively, they were considered in the production and decay rates of ABA. ABA level at  
225 different times,  $t$ , for each cultivar is described by an ordinary differential equation:



$$\begin{aligned}
 226 \quad \frac{d ABA_i(t)}{dt} &= p_{NCED1}^i * NCED1_i(t) + p_{NCED3}^i * NCED3_i(t) + p_{NCED4}^i * NCED4_i(t) + p_{NCED5}^i \\
 227 \quad & * NCED5_i(t) \\
 228 \quad & - \left( p_{CYP707A4a}^i * CYP707A4a_i(t) + p_{CYP707A4b}^i * CYP707A4b_i(t) + p_{UGT}^i \right. \\
 229 \quad & \left. * UGT_i(t) \right) * ABA_i(t)
 \end{aligned}$$

230 for  $i=1,2$ , where  $i=1$  represents the index of cultivar ‘Regina’ and  $i=2$  is the index of cultivar  
 231 ‘Cristobalina’.

232 In both cultivars, for the sake of simplicity, it was assumed that the rates are linearly dependent on the  
 233 gene levels. For example, the rate of *NCED1*–dependent ABA production in Regina at a time  $t$  is  
 234 described by  $p_{NCED1}^1 * NCED1_1(t)$  where  $p_{NCED1}^1$  is a non-negative rate constant (model parameter).  
 235 Genes (*NCEDs*, *CYP707As* and *UGT*) are treated as the time-dependent parameters of the model and  
 236 their values are taken from the data. More precisely, going back to the earlier example, the level of  
 237 *NCED1* in ‘Regina’, labelled  $NCED1_1(t)$ , is a function of time  $t$  with values calculated from linearly  
 238 interpolated mean ‘Regina’ data values of *NCED1*. Initial level of ABA at time 0 in each cultivar, i.e.  
 239  $ABA(0)$ , is taken to be the mean level of ABA on the first day of measurement.

240 In order to show whether the differential in ABA in the two cultivars could be explained solely by the  
 241 differences in *NCEDs*, *CYP707As* and *UGT*, we tested whether there exists a set of parameters where  
 242 the parameter values for both cultivar models are the same (i.e.  $p_{NCED1}^1 = p_{NCED1}^2, p_{NCED3}^1 = p_{NCED3}^2$   
 243 and so on) but for which the model simulations can show the ABA differences seen between the two  
 244 cultivars. Latin Hypercube Sampling was used to select 100,000 parameter sets. Since the gene levels  
 245 can peak with level (in TPM) of up to 100 times higher than ABA levels (in pg/mg), the production and  
 246 decay rate constants were bounded above by 0.001 and 0.005, respectively. Once the model solutions  
 247 were calculated, least squares analysis was performed to calculate the residuals between the models and  
 248 the mean ABA data of each of the two cultivars. Model with the parameter set that had the lowest sum  
 249 of the least squares was chosen for simulation and prediction. Predictions for the best model were  
 250 evaluated using root mean square error (RMSE).

251 Finally, using the mean data measurements for  $PavNCEDs$ ,  $PavCYP707As$  and  $PavUGT$  of the cultivar  
 252 ‘Garnet’ and the model parameter set identified above, we used our model to predict the levels of ABA  
 253 in the ‘Garnet’ cultivar. Since the initial value of ABA content in ‘Garnet’ cultivar was not measured,  
 254 we took it arbitrarily to be 1 at the time 0 (this being a value that also falls within the range of the initial  
 255 ABA levels of the ‘Regina’ and ‘Cristobalina’ cultivars).

256

## 257 RESULTS

## 258 Exogenous GA application accelerates bud dormancy release

259 GA and ABA effect on the bud break response to forcing conditions was evaluated on branches carrying  
260 dormant flower buds as assessed by forcing tests on the late flowering cultivar ‘Fertard’ (Fig. S1).  
261 Results revealed that GA<sub>3</sub> and GA<sub>4</sub> both had significant dormancy alleviating effects, characterized by  
262 higher bud break percentage, which was confirmed for GA<sub>3</sub> in a second experiment in 2018 (Fig. 3, Fig.  
263 S2). However, no antagonist effect, namely bud break inhibition, was observed after a treatment with  
264 paclobutrazol.

265 In both seed and bud dormancy, it is hypothesized that GAs and ABA act antagonistically to control  
266 growth resumption and inhibition, respectively. We therefore tested the potential inhibiting effect of  
267 ABA on flower bud emergence. We did not observe a significant effect of ABA treatment on dormancy  
268 release, but bud break for ABA-treated branches was slightly higher than the control (Fig. 3, Fig. S2).  
269 However, inhibiting ABA biosynthesis with fluridone activated bud break, consistent with the  
270 established role of ABA in promoting dormancy.

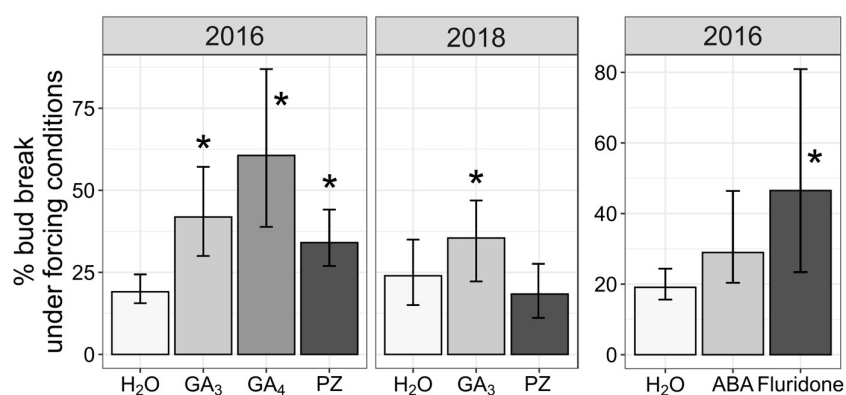

**Figure 3 Effect of different GAs, ABA and their inhibitor on the sweet cherry dormancy status.** Sweet cherry branches were treated with (a) 5  $\mu$ M GA<sub>3</sub>, 5  $\mu$ M GA<sub>4</sub>, 300  $\mu$ M, paclobutrazol (GA pathway inhibitor), (b) 400  $\mu$ M ABA and 5  $\mu$ M fluridone (ABA pathway inhibitor) and transferred under forcing conditions (25°C, 60-70% humidity, 16 hours light). The percentage of flower bud break was recorded after 20 days. Error bars indicate the data range between the five biological replicates. Asterisks indicate treatments that differ significantly from untreated branches (Kruskal-Wallis test,  $p < 0.05$ ). ABA: Abscisic acid; GA: Gibberellic acid.

271

## 272 Definition of the flower bud dormancy status of three cultivars with different flowering dates

273 We selected three sweet cherry cultivars based on their different dates of flowering: very early, early  
274 and late for ‘Cristobalina’, ‘Garnet’ and ‘Regina’, respectively. The stages of bud dormancy were  
275 defined based on anatomical and physiological elements (Fig. 2a). We associated predormancy with  
276 developmental stages of the flower buds along green leaves and active growth (July to September).  
277 Dormancy onset is often hypothesized to occur at leaf fall (Chmielewski et al. 2017) and we observed  
278 leaf senescence at the beginning of October and complete leaf fall at the end of October. Therefore,

279 dormancy onset was set in October and the beginning of endodormancy was established in November  
 280 (Fig. 2a). These stages were similar for all three cultivars. By definition, endodormancy correspond to  
 281 the bud inability to fully develop under growth-inducing conditions while dormancy is considered as  
 282 released when bud break is triggered by warm temperatures and/or long photoperiod (Lang et al. 1987).  
 283 Consequently, dormancy status was assessed by forcing tests on branches carrying flower buds (Fig.  
 284 2b). Endodormancy was defined for the dates with no bud break under forcing conditions (Fig. 2).  
 285 Incomplete bud break within the population of flower buds indicated dormancy release stages while  
 286 ecodormancy was defined by optimal bud break response to growth conditions (90-100% bud break;  
 287 Fig. 2). Here, the three cultivars were much contrasted in the timing of their dormancy phases,  
 288 ‘Cristobalina’ exhibiting dormancy release on December 9<sup>th</sup>, seven weeks earlier than ‘Garnet’ (January  
 289 29<sup>th</sup>) and ten weeks earlier than ‘Regina’ (February 26<sup>th</sup>).

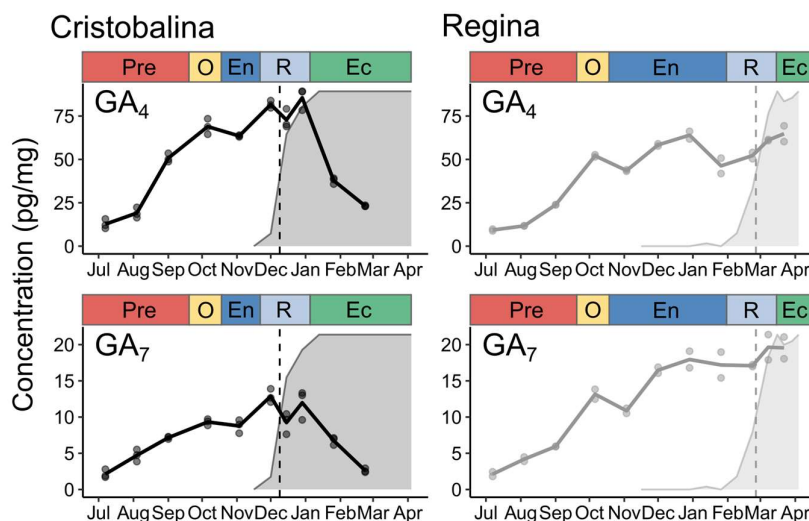

**Figure 4 Levels of endogenous bioactive GA<sub>4</sub> and GA<sub>7</sub> in the flower buds of two sweet cherry cultivars during bud development.** Black: ‘Cristobalina’, grey: ‘Regina’. Background areas correspond to the dormancy depth evaluated as the percentage of bud break under forcing conditions (see Fig. 2b). Dotted lines represent dormancy release. GA: Gibberellic acid.

## 290 GA content changes during flower bud dormancy progression

291 In recent studies, distinct functions were identified for gibberellins during bud dormancy (Zhuang et al.  
 292 2013, Zheng et al. 2018). To test whether these results could be confirmed in sweet cherry buds, GA  
 293 levels were determined over the whole bud development cycle in the very early and late flowering  
 294 cultivars, ‘Cristobalina’ and ‘Regina’. In details, we studied the content of bioactive GA<sub>1</sub>, GA<sub>3</sub> GA<sub>4</sub> and  
 295 GA<sub>7</sub> but the levels of GA<sub>1</sub> and GA<sub>3</sub> were undetectable in the samples. GA<sub>4</sub>, GA<sub>7</sub> have a similar pattern  
 296 over dormancy progression (Fig. 4) rising from July onwards, which corresponds to flower primordia  
 297 initiation and organogenesis. Bioactive GA levels also increase at the beginning of endodormancy  
 298 (November – December), reaching their highest concentration during dormancy release. Results show  
 299 a sharp decrease in the levels of GA<sub>4</sub> and GA<sub>7</sub> overlapping with ecodormancy for ‘Cristobalina’, which

300 could not be observed for the late cultivar ‘Regina’, potentially due to the lack of ecodormancy coverage.  
301 Interestingly, the levels of GA<sub>4</sub>, and GA<sub>7</sub> significantly differed between the two cultivars, especially  
302 during endodormancy and when dormancy release was triggered in the early cultivar (Fig. S3b). Notable  
303 differences in GA<sub>7</sub> content were observed between these two cultivars during the entire time course, in  
304 which the late cultivar buds contained more GA<sub>7</sub> than the early cultivar (Fig. 4) while levels for GA<sub>4</sub>  
305 were significantly higher in the early cultivar during endodormancy (Fig. S3b). Among the quantified  
306 active GAs, GA<sub>4</sub> was between three and eight times more present than GA<sub>7</sub>. GA<sub>4</sub> was the most detected  
307 active GA in the early cultivar ‘Cristobalina’, with a relatively high level reached just after dormancy  
308 release in December. By contrast, levels of GA<sub>7</sub> were higher in ‘Regina’, but with the maximal  
309 concentration measured just after dormancy release.

310

### 311 **Expression of GA pathway-related genes have distinct patterns during sweet cherry bud** 312 **dormancy**

313 To better understand the mechanisms linked to the GA pathway during dormancy progression, we  
314 investigated genes involved in GA biosynthesis pathway, degradation, signal transduction and response.  
315 We found seven *PavGA20ox* and five *PavGA3ox* for GA biosynthesis genes in the peach database (S3)  
316 but only three genes were differentially expressed during flower bud development and dormancy (Fig.  
317 5, Table S2). Interestingly, *PavGA20ox2* expression increased in December for both cultivars, regardless  
318 of their dormancy status but decreased prior to dormancy release. The marked increase in *PavGA20ox1a*  
319 expression could be correlated with the production of GAs after dormancy release. The last step of active  
320 GA biosynthesis relies on the activity of GA3ox essentially for the production of GA<sub>1</sub> and GA<sub>4</sub>.  
321 *PavGA3ox1a* was the only *GA3ox* transcript detected during dormancy and its expression increases as  
322 early as dormancy onset (October), followed by a sharp increase during endodormancy, reaching its  
323 highest expression value at maximum dormancy depth in December, for both cultivars (Fig. 5).  
324 *PavGA3ox1a* is then downregulated during or after dormancy release, with a marked lag between the  
325 two cultivars, potentially linked to their separate dormancy release date (Fig. 5). We identified four  
326 differentially expressed *PavGA2ox* genes, involved in GA inactivation (Fig. 5, Tables S2, S3).  
327 *PavGA2ox1* and *PavGA2ox8b* were highly expressed during endodormancy, concomitantly with  
328 *PavGA3ox1a* expression, thus suggesting a balance between synthesis and degradation that closely  
329 controls the levels of bioactive GAs. *PavGA2ox8c* and *PavGA2oxb* were expressed before dormancy  
330 and during the early stages of dormancy. The expression of *PavGA2ox1* was three times higher for  
331 ‘Regina’ than for ‘Cristobalina’ while it was the opposite for *PavGA2ox8b*.

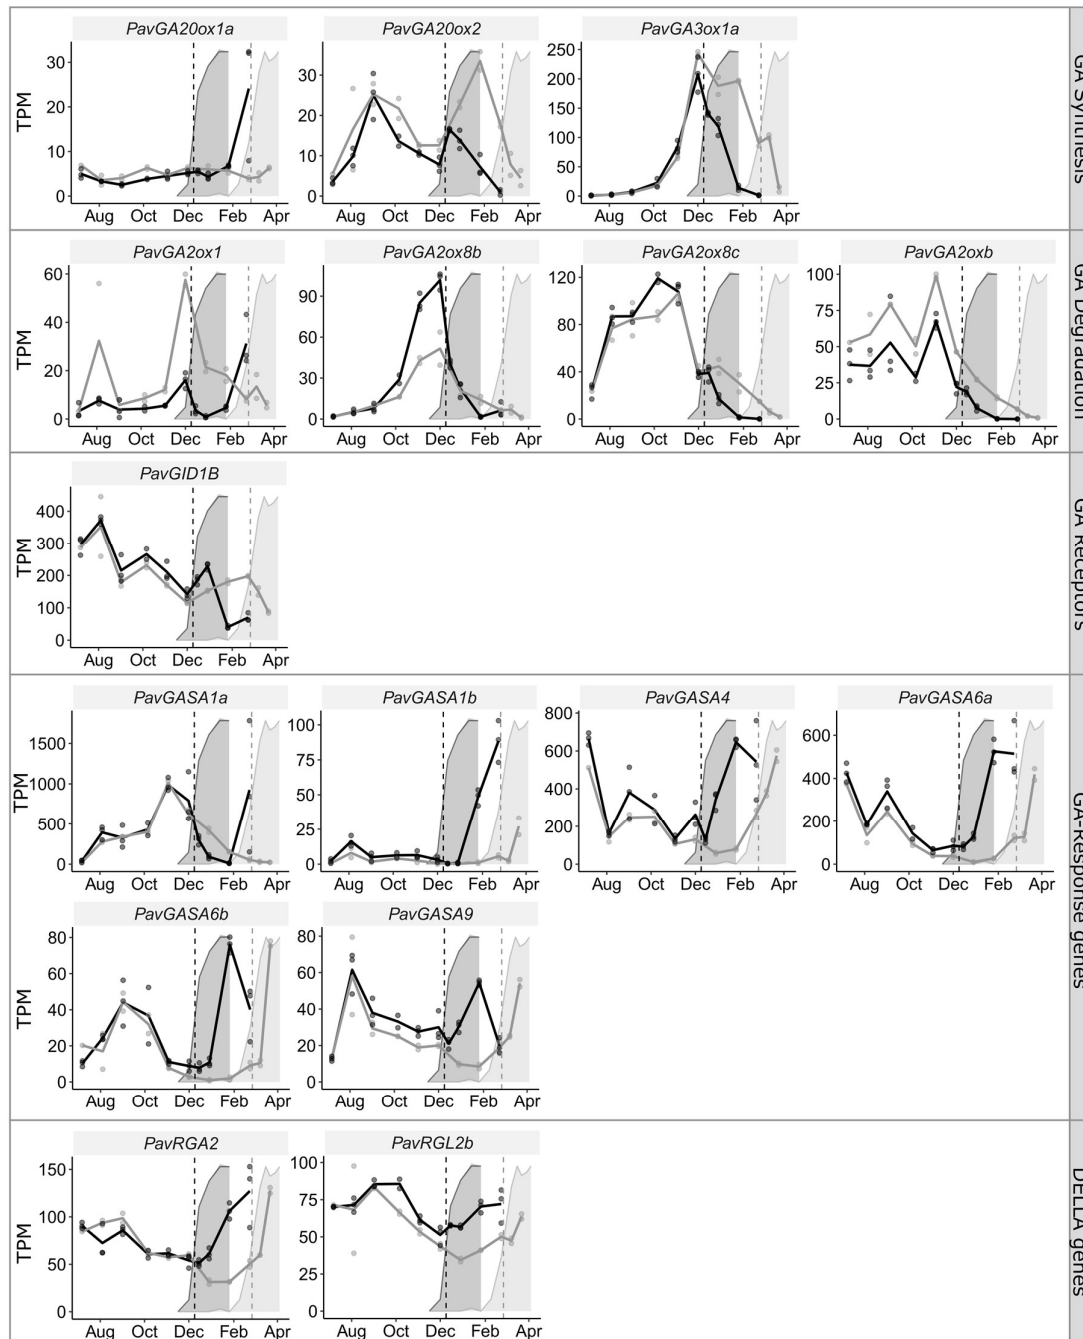

**Figure 5 Transcriptional dynamics of genes associated with GA pathway in the flower buds of two sweet cherry cultivars during bud development.** Expression of specific genes involved in GA biosynthesis pathway, degradation, signal transduction and response are represented in TPM (Transcripts Per Million reads). Black: ‘Cristobalina’, grey: ‘Regina’. Background areas correspond to the dormancy depth evaluated as the percentage of bud break under forcing conditions (see Fig. 2b). Dotted lines represent dormancy release. GA: Gibberellic acid; GA20ox: GA 20-oxidases, GA3ox: GA 3-oxidases; GA2ox: GA 2-oxidases; GID: GA INSENSITIVE DWARF; GASA: GA Stimulated Arabidopsis; RGA: REPRESSOR OF GA; RGL: RGA-like.

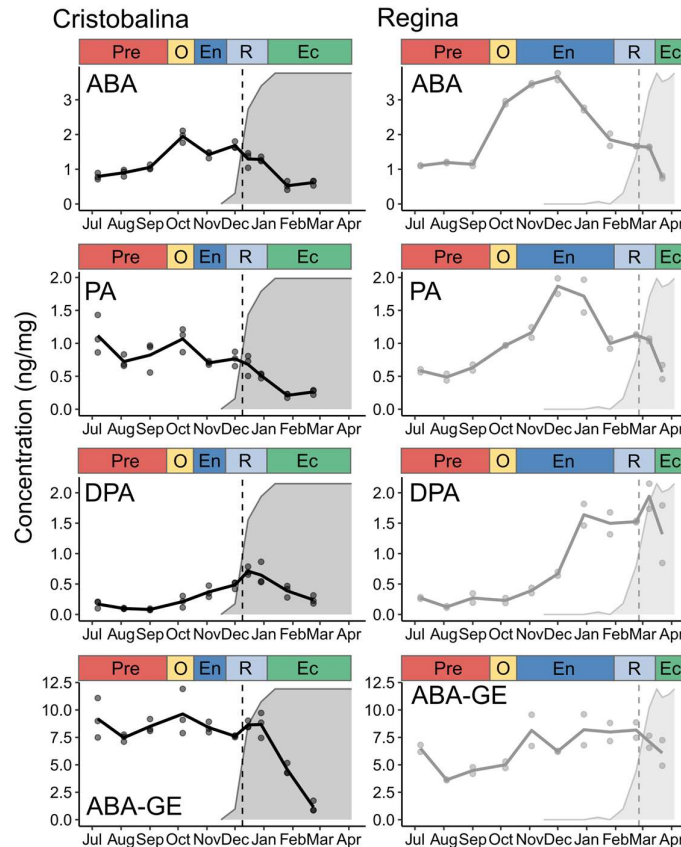

**Figure 6 Levels of endogenous bioactive ABA and ABA conjugates in the flower buds of two sweet cherry cultivars during bud development.** Black: ‘Cristobalina’, grey: ‘Regina’. Background areas correspond to the dormancy depth evaluated as the percentage of bud break under forcing conditions (see Fig. 2b). Dotted lines represent dormancy release. ABA: Abscisic acid; PA: phaseic acid; DPA: dihydrophaseic acid, ABA-GE: ABA-glucose ester.

333 In terms of GA signaling, our results show that the identified GA receptor-related *GA INSENSITIVE*  
 334 *DWARF1B (PavGID1B)* is highly expressed during the predormancy (July, August) and early stages of  
 335 dormancy (September, October; Fig. 5). For ‘Cristobalina’, expression of the receptor gene sharply  
 336 decreased after endodormancy was released. Ten GA-response genes, *GA Stimulated Arabidopsis*  
 337 (*GASA*), potentially regulated by GAs (Aubert et al. 1998), were identified in the transcript dataset  
 338 (Table S3) and we analyzed the seven genes differentially expressed during flower bud cycle (Fig. 5,  
 339 Table S2). Expression patterns are diverse but for the majority (*PavGASA1b, 4, 6a, 6b, 6c, 9*), a decrease  
 340 in expression was detected during deep dormancy (November, December), thus suggesting that GA-  
 341 activated pathways are inhibited during dormancy, despite high contents in GAs (Fig. 4). More  
 342 strikingly, all *PavGASA* genes, except for *PavGASA1b*, were sharply upregulated during dormancy  
 343 release. However, one notable exception is *PavGASA1a* that is highly activated specifically during  
 344 dormancy (Fig. 5). The repression of GA by DELLA proteins is well characterized in annuals (Zentella  
 345 et al. 2007), so to further investigate GA pathway, we identified ten genes coding for predicted DELLAs,  
 346 namely *PavGAI, PavGAI1, PavRGA1, PavRGA2, PavRGL1a, b, c* and *PavRGL2a, b, c* (Table S3).



347 Among them, *PavRGA2* and *PavRGL2b* genes were differentially expressed during bud development,  
348 characterized by a down-regulation during dormancy onset and endodormancy, followed by a marked  
349 increase during dormancy release and ecodormancy (Table S2, Fig. 5).

350

### 351 **ABA levels rise at the onset of dormancy**

352 Several studies have highlighted a strong correlation between ABA content and dormancy status and to  
353 address this issue in sweet cherry flower buds, we measured ABA levels, as well as PA and DPA, which  
354 are catabolites of ABA, in both cultivars. Results show an increase in ABA and PA content during the  
355 early stages of dormancy, reaching their highest levels in October and December for ‘Cristobalina’ and  
356 ‘Regina’, respectively, which is approximately two months prior to dormancy release for both cultivars.  
357 This ABA peak is followed by a decrease in ABA levels, accompanied by increased levels of DPA,  
358 preceding dormancy release (Fig. 6). ABA, PA and DPA levels detected during dormancy for the early  
359 cultivar ‘Cristobalina’ are significantly lower than for the late cultivar (Fig. S3a). We can therefore  
360 hypothesize that dormancy depth is highly correlated with ABA contents in sweet cherry buds.

361 Esterification of ABA with glucose was also monitored and the concentrations of ABA-GE were higher  
362 in both cultivars compared with ABA and its conjugates. The ABA-GE content was constantly high in  
363 ‘Regina’ over the whole cycle, with a slight increase during endodormancy induction, while it markedly  
364 decreased in ‘Cristobalina’ during ecodormancy (Fig. 6, Fig. S3a). However, this observation could be  
365 due to a low coverage of ecodormancy in the ‘Regina’ samples. Throughout pre-dormancy stages, ABA-  
366 GE content was significantly higher in the early cultivar ‘Cristobalina’ compared to the late cultivar  
367 ‘Regina’ (Fig. S3a).

368

### 369 **Analysis of genes involved in ABA pathway**

370 Expression for genes involved in the multiple ABA biosynthesis steps, *PavABAI-4*, *PavNCED1* and  
371 *PavNCED4*, is not correlated with ABA levels while expression patterns for *PavNCED3* and  
372 *PavNCED5* genes seem strongly linked to ABA contents and dormancy status (Fig. 7, Fig. S4). In  
373 particular, *PavNCED5* expression shows a sharp increase during dormancy onset and a marked decay  
374 before dormancy release. On the other hand, low ABA levels are associated with increased expression  
375 for ABA catabolism genes *PavCYP707A1* and *PavCYP707A4* before and after dormancy respectively  
376 (Fig. 7, Fig. S4). By contrast, *PavCYP707A2* is characterized by a sharp increase in December, followed  
377 by a marked decrease during dormancy release in ‘Cristobalina’ but before induction of dormancy  
378 release in ‘Regina’. In addition, we identified *PavUGT71B6* (Supporting Information Table S2), a sweet  
379 cherry ortholog of the *Arabidopsis thaliana* UDP-glycosyltransferase *71B6*, that preferentially  
380 glycosylates ABA into ABA-GE (Priest et al., 2006). *PavUGT71B6* was considerably upregulated in

381 the early cultivar compared to the late cultivar, with a gradual increase between July and deep dormancy  
 382 followed by a decrease in expression before endodormancy release (Fig. 7).

383 We examined sweet cherry gene predictions for genes involved in ABA signaling. Among the seven  
 384 ABA receptors *PYR/PYL* genes identified for sweet cherry (Table S3), six were differentially expressed  
 385 during flower bud dormancy (Fig. 7, Fig. S4, Table S2). In particular, *PavPYL8* expression was  
 386 correlated with ABA levels, increasing after dormancy onset and decaying after dormancy release (Fig.  
 387 7). A similar pattern was observed for *PavPYL12* in ‘Cristobalina’. Among the differentially expressed  
 388 ABA response genes (Supporting Information Tables S2, S3), *PavABF2* and *PavHAB2* had similar  
 389 patterns with a sharp increase in expression in December while the expression of *PavABF3* and *PavABI1*  
 390 decreased after dormancy release (Fig. 7).

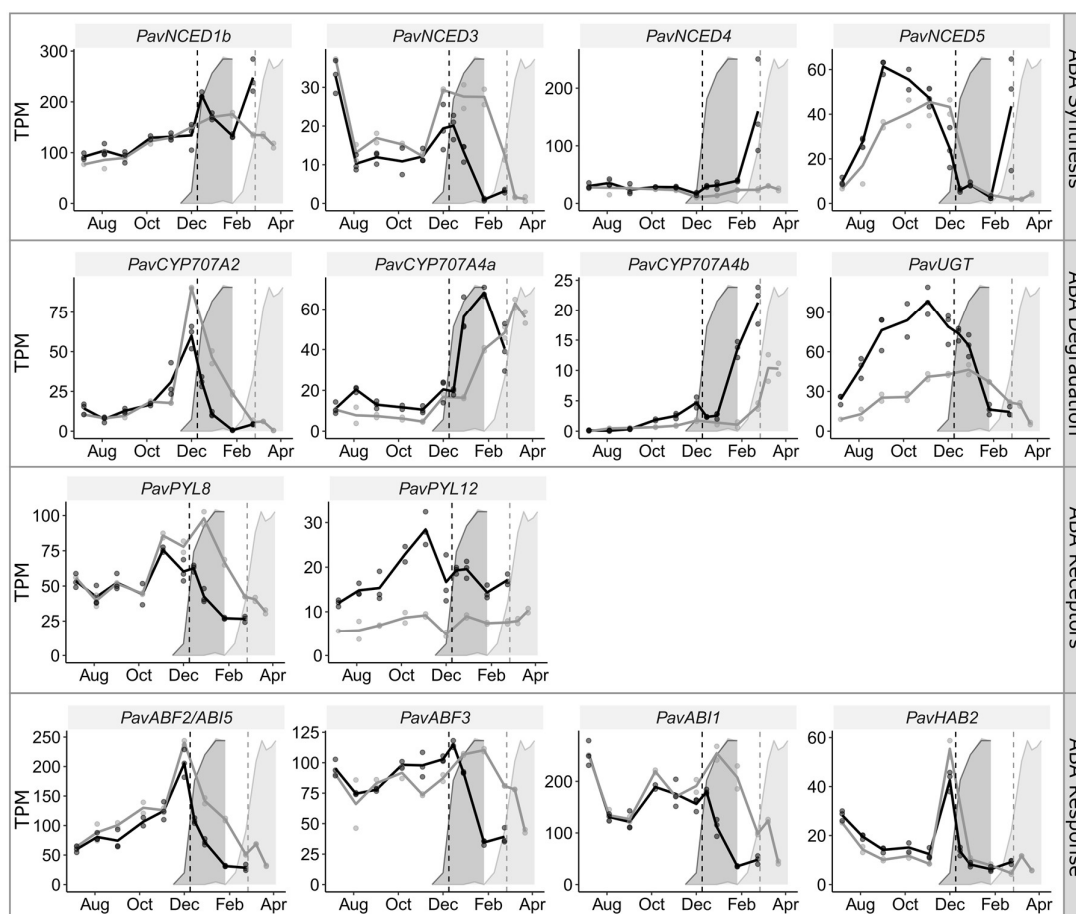

**Figure 7 Transcriptional dynamics of genes associated with ABA pathway in the flower buds of two sweet cherry cultivars during bud development.** Expression of specific genes involved in ABA biosynthesis pathway, degradation, signal transduction and response are represented in TPM (Transcripts Per Million reads). Black: ‘Cristobalina’, grey: ‘Regina’. Background areas correspond to the dormancy depth evaluated as the percentage of bud break under forcing conditions (see Fig. 2b). Dotted lines represent dormancy release. ABA: Abscisic acid; NCED: 9-cis epoxy-carotenoid dioxygenase; PYL: PYR-like; ABF: ABSCISIC ACID RESPONSIVE ELEMENTS-BINDING PROTEIN; ABI; ABA INSENSITIVE; HAB: homology to ABI2; UGT: UDP-GLYCOSYLTRANSFERASE.

### 391 **Modelling suggests ABA levels control onset and duration of dormancy**

392 Based on observations that ABA levels are correlated with dormancy depth, ABA content has been  
393 proposed as an indicator to assess dormancy status in sweet cherry (Chmielewski et al. 2017). We further  
394 investigated the dynamics of ABA biosynthesis and catabolism to estimate dormancy onset and duration.  
395 First, we assumed that ABA synthesis is mainly controlled by *PavNCEDI*, 3, 4 and 5 while ABA is  
396 converted to PA by 8'-hydroxylases *PavCYP707A4* and esterified into ABA-GE by *PavUGT71B6* (Fig.  
397 **8a**). Since data for protein activity are not available, we used transcript levels as a proxy for enzymatic  
398 activity. We then used an Ordinary Differential Equation (ODE) approach to model how dormancy may  
399 be regulated by ABA levels. The mathematical model, based on identical parameter set for both  
400 cultivars, shows a good fit to the data, with a global RMSE equal to 0.3468 for all data, and 0.3142 and  
401 0.3627 for 'Cristobalina' and 'Regina' respectively indicating that the differential in ABA levels  
402 between the two cultivars can be solely explained by the differences in gene expression of the relevant  
403 enzymes (Fig. **8b**). To validate the model, we simulated ABA levels for a third cultivar 'Garnet' that  
404 was examined along 'Cristobalina' and 'Regina'. Endodormancy was released on January 21<sup>st</sup> for  
405 'Garnet', an early flowering cultivar. Based on expression data for *PavNCEDI*, 3, 4 and 5,  
406 *PavCYP707A4a*, *PavCYP707A4b* and *PavUGT* genes (Fig. **8**, Fig. **S5**), the model simulated ABA levels  
407 for 'Garnet' during dormancy (Fig. **8c**). Simulated ABA content for 'Garnet' increases during dormancy  
408 onset, reaches high values during endodormancy and decreases before dormancy release, earlier than  
409 for the late cultivar 'Regina'. Highest estimated levels for ABA are lower in 'Garnet' than in 'Regina'  
410 but higher than 'Cristobalina'.

411 Observed and simulated levels of endogenous ABA at the date of dormancy release show a good match  
412 for both 'Cristobalina' and 'Regina' cultivars (Fig. **6**, **8b**). ABA levels are low before dormancy onset  
413 but as they increase dormancy is triggered; high ABA levels maintain dormancy but they decrease under  
414 chilling temperatures and endodormancy is released as ABA content falls. The Garnet ABA simulated  
415 levels lie between those of Cristobalina and Regina levels, thus if ABA content is related to dormancy  
416 release, then our modelling predicts that under a chosen fixed threshold of ABA, Garnet dormancy  
417 release will occur between the other two release dates. For example, ABA simulated levels of  
418 'Cristobalina', 'Regina' and 'Garnet' would fall below the arbitrary threshold of 1.46 ng/mg on  
419 December 7<sup>h</sup>, February 27<sup>st</sup> and January 27<sup>th</sup>, respectively. Choice of any other threshold during this  
420 period will result in the same date order. Such ordering is observed in our data for dormancy release  
421 (Fig. **2a**); 'Cristobalina' and 'Regina' release dates are December 9<sup>th</sup> and February 26<sup>th</sup>, while 'Garnet'  
422 release date is the January 29<sup>st</sup>; thus opening the possibility that there is a threshold for ABA  
423 concentration that determines the dormancy status. Since we can account for the dormancy behavior of  
424 a wide-range of cultivars based on the expression of a small number of key genes regulating ABA levels,  
425 this underscores the central role of this phytohormone in the control of dormancy progression.

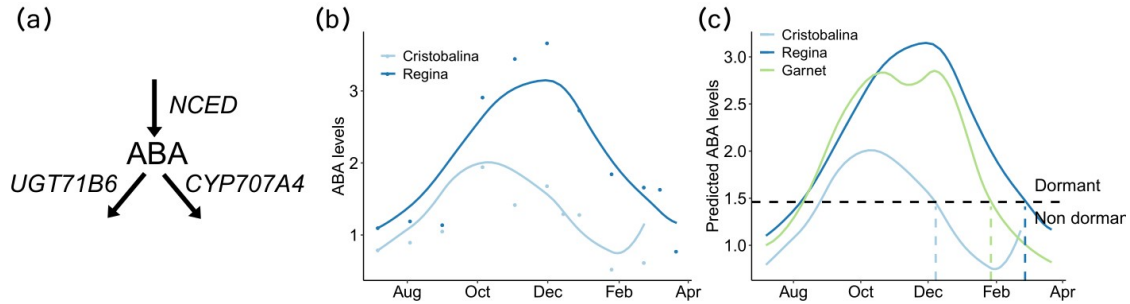

**Figure 8 Modelling ABA.** (a) Conceptual model used to simulate ABA content. ABA synthesis is controlled by NCED1, NCED3, NCED4 and NCED5 proteins; ABA is deactivated by 8'-hydroxylases CYP707A4 and UGT71B6. The assumption is that enzymatic activity is proportional to gene expression levels. (b) Simulated content of ABA using the model (lines) with means of data (circles) for cultivars 'Cristobalina' and 'Regina'. The model is simulated with parameters:  $p_{NCED}^{1,2} = 0.0029$ ,  $p_{NCED3}^{1,2} = 0.002241$ ,  $p_{NCED4}^{1,2} = 0.0000218$ ,  $p_{NCED5}^{1,2} = 0.009599$ ,  $p_{CYP707A4b}^{1,2} = 0.00010859$ ,  $p_{CYP707A4a}^{1,2} = 0.00012048$  and  $p_{UGT}^{1,2} = 0.0003027$ . (c) Simulated levels of ABA for cultivars 'Cristobalina' and 'Regina', that were used to calibrate the model, and for 'Garnet'. Arbitrary level of ABA set at 1.46 ng/mg (black dash line) is reached by 'Cristobalina', 'Garnet' and 'Regina' simulations on December 7<sup>th</sup>, January 27<sup>th</sup> and February 27<sup>th</sup>, respectively (colored dash lines). ABA: Abscisic acid; NCED: 9-cis epoxy-carotenoid dioxygenase; UGT: UDP-GLYCOSYLTRANSFERASE.

426

## 427 DISCUSSION

### 428 Sweet cherry specific GA signaling during bud dormancy

429 We have shown that GA<sub>3</sub> and GA<sub>4</sub> have significant dormancy alleviating effects in sweet cherry  
 430 cultivars, similar to previous observations in hybrid aspen (*Populus tremula* × *Populus Tremuloides*;  
 431 Rinne et al. 2011), Japanese apricot (*Prunus mume*; Zhuang et al. 2013) and peach (Donoho and Walker  
 432 1957), but opposed to null or inhibitory effects on dormancy release previously reported in hybrid aspen  
 433 and grapevine (Rinne et al. 2011, Zheng, et al. 2018). In addition, high levels of GA<sub>4</sub> and GA<sub>7</sub> were  
 434 detected in sweet cherry flower buds, similarly to results obtained in pear (Ito et al. 2019), whereas GA<sub>1</sub>  
 435 and GA<sub>3</sub> were undetectable in the samples, contradictory to the high GA<sub>1</sub> and GA<sub>3</sub> levels recorded in  
 436 grapevine and Japanese apricot buds during dormancy (Zhang et al. 2018, Zheng et al. 2018). These  
 437 observations are consistent with the hypothesis that GAs act in a complex manner, with differential  
 438 effects depending on concentrations and developmental phases, as discussed in Zheng et al. (Zheng et  
 439 al. 2018). In addition, GA effects might be species or even cultivar-specific, with complex interactions  
 440 with environmental factors, such as temperature or photoperiod. Further investigation on the regulation  
 441 of the GA-related pathway during dormancy in sweet cherry, under contrasted environmental conditions,  
 442 will bring key elements to the current hypotheses. Furthermore, given the complexity of GA  
 443 quantification, it is possible that key GA dynamics might have been missed in the present study and  
 444 therefore, expression of GA-pathway-related genes might be more reliable. Here, based on our results,  
 445 we propose our hypotheses on GA signaling involving different transcriptional cascades during sweet  
 446 cherry flower bud dormancy:

447 i) During predormancy stages (July to September), GA<sub>4</sub> and GA<sub>7</sub> content progressively increases,  
448 associated with an increase in *PavGA20ox2* expression, and the activation of GA signaling, as revealed  
449 by the increased expression of GA-response genes *PavGASA1a*, 4, 6b, and 9. Enhanced GA content  
450 potentially triggers the expression of *PavGA20ox8c* to catalyze GA deactivation as part of the feedback  
451 regulation (Yamaguchi 2008). In Arabidopsis, proteins GASA4 and GASA6 are involved in flower  
452 development and cell elongation, respectively, in response to GA signaling (Roxrud et al. 2007, Zhong  
453 et al. 2015) therefore we can hypothesize that gibberellin signaling, mostly driven by *PavGA20ox2* in  
454 this phase may control flower bud organogenesis and development.

455 ii) After endodormancy is induced, there is a marked increase in GA<sub>4</sub> and GA<sub>7</sub> contents. Gibberellin  
456 homeostasis seems to be actively controlled during endodormancy through enhanced expression of  
457 biosynthesis gene *PavGA3oxa* and deactivation genes *PavGA2ox1*, *PavGA2ox8b* and *PavGA2ox8c*.  
458 Interestingly, previous studies have shown that cellular transport is blocked during dormancy (Rinne et  
459 al. 2011, Tylewicz et al. 2018) and we can therefore hypothesize that although GAs may be present in  
460 the bud, their growth-promoting effect is physically inhibited. In agreement with acute GA deactivation,  
461 only one GA-response gene is activated during this phase, *PavGASA1a*, thus suggesting a very specific  
462 response. Expression for the five GA-related genes up-regulated during endodormancy sharply decrease  
463 during dormancy release, thus supporting the hypothesis that this is an endodormancy-specific  
464 regulation.

465 iii) As observed in the early cultivar ‘Cristobalina’, levels for GA<sub>4</sub> and GA<sub>7</sub> decrease during  
466 ecodormancy, associated with low, if not null, expression for *PavGA20ox2* and *PavGA3ox2a* synthesis  
467 genes, as well as *PavGA2ox8b*, *PavGA2ox8c*, *PavGA2oxb* deactivation genes and *PavGID1B* receptor.  
468 Interestingly, the GA-response *PavGASA* genes and the DELLA genes *PavRGA2* and *PavRGL2* are  
469 markedly activated during ecodormancy, thus suggesting that GA-stimulated pathways are up-regulated.  
470 Indeed, despite decreasing GA<sub>4</sub> and GA<sub>7</sub> levels during ecodormancy, GA-response pathways seem to  
471 be mostly activated when *GA2ox* genes are down-regulated after dormancy release so further  
472 investigation on the control of GA deactivation during dormancy could unravel a potential regulation  
473 by cold accumulation. In addition, bioactive GAs, including GA<sub>1</sub> and GA<sub>3</sub>, that were not detected in the  
474 current study might be key actors in the growth resumption stage of ecodormancy in sweet cherry. Acute  
475 GA response occurring during ecodormancy, including activation of *GASA* genes, was previously  
476 reported in grapevine (Zheng et al. 2018), oak (Ueno et al. 2013), pear (Yang et al. 2019) and Japanese  
477 apricot (Zhang et al. 2018). Despite the fact that DELLA genes’ activity is mainly regulated by protein  
478 stability, the up-regulation of *PavRGA2* and *PavRGL2* genes is consistent with the GA response during  
479 ecodormancy, associated with a decrease in *PavGID1B* expression. These results suggest that the GA  
480 homeostasis, critical during active growth, is controlled in sweet cherry by the DELLA proteins, that  
481 target GA biosynthesis and receptor genes and impacts GA balance through a feedback regulation, as



482 previously shown in Arabidopsis and rice (Gagne et al. 2002, Ueguchi-Tanaka et al. 2007, Zentella et  
483 al. 2007).

#### 484 **Dormancy depth is correlated with endogenous ABA content**

485 Exogenous application of ABA on the sweet cherry dormant bud showed that buds at this specific stage  
486 were not affected by ABA treatment, in contrast to the observation that ABA treatment had a significant  
487 effect on grapevine bud break (Zheng et al. 2015). However, as shown by the high expression of genes  
488 involved in ABA degradation, including *PavCYP707A2*, high catabolism ability during endodormancy  
489 might have limited the effect of exogenous ABA. It might also suggest that ABA response is saturated  
490 in the context of very high ABA levels during endodormancy, therefore limiting the effect of additional  
491 ABA. Nevertheless, we observed that dormancy release was triggered in buds treated with fluridone that  
492 inhibits ABA biosynthesis, thus suggesting that high ABA levels may act to maintain dormancy. This  
493 was further confirmed by the observed elevated ABA levels correlated with endodormancy in both  
494 cultivars, as well as the differences in ABA levels between the early and late flowering cultivars. Our  
495 results are consistent with the hypothesis that dormancy is triggered and maintained when ABA levels  
496 are above a threshold, taking into account the potential heterogeneity within a population of flower buds.  
497 Bud dormancy may subsequently be released if ABA levels fall below the threshold. Consequently, such  
498 a dormancy release threshold would be reached earlier in the season for early cultivars with less ABA  
499 (Wen et al. 2016) or when ABA levels are lower due to various environmental conditions (Chmielewski  
500 et al. 2017). Recent reports have indeed shown how low or high levels of ABA closely drive the depth  
501 of dormancy by controlling the blockage of cellular transports (Tylewicz et al. 2018, Singh et al. 2019).  
502 We show that during the predormancy and dormancy onset stages, ABA levels are correlated with an  
503 increase in the expression of *PavNCED5*, then *PavNCED3* genes in both cultivars. Consistently with  
504 elevated ABA levels, genes encoding ABA receptors (*PavPYL12*,  $\delta$ ), as well as ABA response genes,  
505 are highly expressed during deep dormancy. One interesting result is that *PavNCED5* expression peak  
506 coincides with the highest ABA levels in October in ‘Cristobalina’ and in December in ‘Regina’,  
507 approximately two months before dormancy is released. This suggests that the deepest dormancy state  
508 might occur earlier in ‘Cristobalina’ than in ‘Regina’ and therefore question whether endodormancy is  
509 indeed induced simultaneously in both cultivars. Further physiological observations during the early  
510 stages of dormancy induction, including flower primordia developmental context (Fadón et al. 2018),  
511 could help better understanding the observed differences. Afterwards, genes involved in ABA  
512 degradation (*CYP707A*) are highly expressed during dormancy release and positively correlated with a  
513 decrease of ABA content. Similar results were reported in other *Prunus* species (Zhang et al. 2015,  
514 Wang et al. 2016, Tuan et al. 2017) confirming the major role of ABA signaling pathways on the  
515 regulation of dormancy induction, maintenance and release.



516 Presently, a remaining question to elucidate is what drives the decrease in ABA levels around dormancy  
517 release. Which mechanisms are involved in the down-regulation of *PavNCEDs* and up-regulation of  
518 *PavCYP707As* through chill accumulation? Firstly, several reports indicate that ABA might regulate its  
519 own accumulation and high levels of ABA attained during endodormancy could up-regulate the  
520 expression of catabolic genes such as *PavCYP707A4*, leading to a global decrease in ABA content.  
521 Secondly, *DORMANCY-ASSOCIATED MADS-BOX (DAM)* genes have been strong candidates for a  
522 key role in dormancy promotion and maintenance (Rodriguez et al. 1994, Bielenberg et al. 2008). *DAM*  
523 genes are highly expressed during dormancy and their expression is inhibited by chill accumulation  
524 (Jiménez et al. 2010, Hao et al. 2015), but more interestingly, recent studies have highlighted the direct  
525 effect of *DAM* on the activation of ABA biosynthesis (Tuan et al. 2017, Yamane et al. 2019). Further *in*  
526 *vitro* assays suggest a potential regulation between CBF proteins and *DAM* promoters (Niu et al. 2015,  
527 Zhao et al. 2018). We therefore hypothesize that chill accumulation induces *CBF* expression and CBF  
528 proteins modulate the expression of *DAM* genes that subsequently upregulate *NCED* genes and ABA  
529 biosynthesis. Chill accumulation potentially induces chromatin modifications that silences *DAM* genes  
530 (Leida et al. 2012, Ríos et al. 2014, de la Fuente et al. 2015) and inhibits ABA production, consistently  
531 with decreasing ABA levels observed as soon as January. Interestingly, a recent study conducted in  
532 hybrid aspen shows that chilling and long photoperiods induces a decrease in ABA levels, which  
533 subsequently drives the decrease in *SHORT VEGETATIVE PHASE-LIKE (SVL)* expression (Singh et al.  
534 2018, 2019). *SVL* shows similarity to *SHORT VEGETATIVE PHASE (SVP)* and *DAM* genes and this  
535 mechanism suggests that ABA might also act on the expression of *DAM* genes. Regulation of *DAM* and  
536 ABA pathways by cold temperatures should be further investigated to better understand how  
537 temperature variations control dormancy progression in sweet cherry flower buds.

### 538 **A contrasted balance between ABA synthesis and conjugation may explain the differences** 539 **between early and late cultivars**

540 Overall, although the dynamics of expression for *PavNCED* and *PavCYP707A* genes effectively explain  
541 the increasing and decreasing pattern of ABA levels between dormancy induction and release, we further  
542 investigated whether they could account for the significant differences observed for ABA levels between  
543 the two cultivars. Contrasted expression patterns for *PavNCED3*, *PavCYP7074a* and *PavCYP7074b*  
544 were not sufficient to explain the noticeably contrasted ABA accumulation during endodormancy  
545 between the two cultivars. Differences in ABA catabolites between cultivars were also observed. While  
546 PA content followed the same pattern as ABA, DPA was particularly high during dormancy release,  
547 inversely correlated with the decreasing ABA levels. Interestingly, Weng and colleagues (Weng et al.  
548 2016) exposed the compensatory effect of PA under low ABA conditions, in which PA is recognized  
549 by ABA receptors (PYL5 and 2) allowing a supplementary growth inhibition effect. In sweet cherry,  
550 increased *PavCYP707A2* expression may explain the higher levels of PA during dormancy in ‘Regina’  
551 and might therefore result in even deeper dormancy by the inhibitory combination of ABA and PA.

552 Since free ABA levels may be controlled through conjugation as well (El Kayal et al. 2011, Chmielewski  
553 et al. 2018, Liu and Sherif 2019), we investigated the conversion of ABA to ABA-GE and we found a  
554 *PavUGT71B6* gene characterized by strikingly higher expression levels for the early cultivar compared  
555 to the late cultivar. UGT71B6 orthologs in Arabidopsis and Adzuki bean act specifically for ABA  
556 conjugation into ABA-GE (Xu et al. 2002, Priest et al. 2006), so up-regulation of *PavUGT71B6*  
557 expression in ‘Cristobalina’ during dormancy explains the higher content of ABA-GE. We can therefore  
558 hypothesize that the low ABA content in the early cultivar may be due to active catabolism of ABA to  
559 ABA-GE.

#### 560 **Towards new phenology approaches based on molecular mechanisms**

561 Following our observations that ABA levels were highly correlated with dormancy status and that  
562 dynamics of expression for ABA synthesis and catabolism could explain the differences observed  
563 between cultivars, we have successfully modeled ABA content and dormancy behavior in three cultivars  
564 exhibiting contrasted dormancy release dates. Indeed, ABA had been proposed as an indicator for  
565 dormancy release in sweet cherry (Chmielewski et al. 2017) but to our knowledge, this is the first attempt  
566 to simulate dormancy onset and duration using molecular data. Only a small number of key genes  
567 regulating ABA were sufficient to account for all variations in ABA levels and dormancy progression  
568 overtime and between cultivars. Previous analyses have shown that ABA levels are highly variables  
569 between years (Chmielewski et al. 2017) therefore further analyses are needed to explore and validate  
570 the current model.

571 Antagonistic actions of ABA and GA have been extensively studied in seed dormancy (Shu et al. 2018)  
572 and the ABA/GA ratio is often proposed as a determinant factor in the control of rest and growth  
573 responses, including dormancy release (Zhang et al. 2018). Therefore, integrating GA signaling into the  
574 bud dormancy model might be necessary to better account for the regulation of dormancy release. For  
575 example, it is possible that high GA levels around dormancy release play a role by overcoming the ABA-  
576 dependent growth inhibition. Interaction between GA and ABA pathways might also be critical in the  
577 response to environmental conditions during dormancy, including intertwined regulations of hormone  
578 biosynthesis (Shu et al. 2013, Yue et al. 2017). This was applied in a very innovative model for seed  
579 germination based on the endogenous hormone integration system (Topham et al. 2017). The hormonal  
580 balance between GA and ABA is regulated by endogenous and environmental signals towards the  
581 developmental switch that triggers termination of dormancy and germination. Accordingly, ON/OFF  
582 systems, like dormancy or flower initiation, can be modelled as developmental switches triggered in  
583 response to quantitative inputs after a threshold has been reached (Wilczek et al. 2009, Donohue et al.  
584 2015, Bassel 2016). In our current model, we propose a first step for mechanistic modelling of dormancy  
585 onset and release based on expression data and ABA quantification. The next steps, in addition to the  
586 integration of GA signaling and its crosstalk with ABA, will be to provide information on temperature-

587 mediated control of the regulatory cascades. Recent research led on Arabidopsis, allowed by high-  
588 throughput sequencing techniques, has hastened the pace for the incorporation of molecular data into  
589 phenology models (Satake et al. 2013, Kudoh 2016), thus opening new roads for perennial studies.

#### 590 **DATA AVAILABILITY**

591 RNA-seq data: Gene Expression Omnibus GSE130426

592 Number of mapped reads for all samples and expression data are available in the **supplementary**  
593 **datafile**

594

#### 595 **SUPPLEMENTARY DATA**

596 **Fig. S1** Chilling and dormancy status during the treatments with exogenous hormones and antagonist  
597 on sweet cherry cultivar ‘Fertard’

598 **Fig. S2** Effect of GAs, ABA and their inhibitor on the bud break percentage under forcing conditions

599 **Fig. S3** Concentration ratio of ABA, ABA conjugates and GAs levels between ‘Regina’ and  
600 ‘Cristobalina’

601 **Fig. S4** Transcriptional dynamics of genes associated with ABA pathway in the flower buds of two  
602 sweet cherry cultivars during bud development

603 **Fig. S5** Transcriptional dynamics of genes involved in ABA synthesis and degradation for the sweet  
604 cherry cultivar ‘Garnet’

605 **Table S1** Description of the flower bud samples used for hormone quantification and RNA-seq and  
606 total number of mapped reads for RNA-seq data

607 **Table S2** RNA-seq filtering and Differential expression analysis

608 **Table S3** Details of the genes related to ABA and GA pathways analyzed in the project

609 **Supplementary Data File** Expression data in transcripts per million reads (TPM) for the genes  
610 analyzed in the project

611

#### 612 **FUNDING**

613 Doctoral fellowship for RB was funded by INRA and the Aquitaine Region (AQUIPRU project 2014-  
614 1R20102-2971). CMI-Groupe Roullier and ANRT financed the CIFRE PhD fellowship for NV.

615

## 616 **ACKNOWLEDGEMENTS**

617 The authors would like to thank INRA and the Aquitaine Region for funding the doctoral fellowship to  
618 RB, and CMI-Groupe Roullier and ANRT for allowing the work conducted by NV. The authors warmly  
619 thank Teresa Barreneche, H el ene Christmann, Jacques Joly and Lydie Fouilhaux, for collecting the  
620 branches and collaborating on the phenotyping. The authors thank the INRA's 'Prunus Genetic  
621 Resources Center' for preserving and managing the sweet cherry collections and the Fruit Experimental  
622 Unit of INRA-Bordeaux (UEA) for growing the trees and managing the orchards.

## 623 **AUTHORS' CONTRIBUTION**

624 BW, SC, ED and PAW designed the original research. NV produced and analyzed the transcriptional  
625 data under the supervision of SC. RB conducted the analysis on exogenous application. AS and NV  
626 performed the phytohormones extraction and quantification. MA, FJ and JCY supervised the  
627 phytohormones analyses. NV and BW wrote the manuscript with the assistance of all the authors.

628

## 629 **REFERENCES**

- 630 Ali N, Schwarzenberg A, Yvin JC, Hosseini SA (2018) Regulatory role of silicon in mediating  
631 differential stress tolerance responses in two contrasting tomato genotypes under osmotic stress.  
632 Front Plant Sci 9:1–16.
- 633 Atkinson CJ, Brennan RM, Jones HG (2013) Declining chilling and its impact on temperate perennial  
634 crops. Environ Exp Bot 91:48–62.
- 635 Aubert D, Chevillard M, Dorne AM, Arlaud G, Herzog M (1998) Expression patterns of *GASA* genes  
636 in *Arabidopsis thaliana*: The *GASA4* gene is up-regulated by gibberellins in meristematic regions.  
637 Plant Mol Biol 36:871–883.
- 638 Bai S, Saito T, Sakamoto D, Ito A, Fujii H, Moriguchi T (2013) Transcriptome Analysis of Japanese  
639 Pear (*Pyrus pyrifolia* Nakai ) Flower Buds Transitioning Through Endodormancy. Plant Cell  
640 Physiol 54:1132–1151.
- 641 Bassel GW (2016) To grow or not to grow. Trends Plant Sci 21:498–505.
- 642 Beauvieux R, Wenden B, Dirlwanger E (2018) Bud Dormancy in Perennial Fruit Tree Species : A  
643 Pivotal Role for Oxidative Cues. Front Plant Sci 9:1–13.
- 644 Bielenberg DG, Wang Y, Li Z, Zhebentyayeva T, Fan S, Reighard GL, Scorza R, Abbott AG (2008)  
645 Sequencing and annotation of the evergrowing locus in peach [*Prunus persica* (L.) Batsch]  
646 reveals a cluster of six MADS-box transcription factors as candidate genes for regulation of  
647 terminal bud formation. Tree Genet Genomes 4:495–507.

- 648 Bolger AM, Lohse M, Usadel B (2014) Trimmomatic: A flexible trimmer for Illumina sequence data.  
649 Bioinformatics 30:2114–2120.
- 650 Chmielewski FM, Baldermann S, Götz K, Homann T, Gödeke K, Schumacher F, Huschek G, Rawel H  
651 (2018) Abscisic Acid Related Metabolites in Sweet Cherry Buds (*Prunus avium* L.). J Hortic 05.
- 652 Chmielewski FM, Götz K, Homann T, Huschek G, Rawel H (2017) Identification of Endodormancy  
653 Release for Cherries (*Prunus Avium* L.) by Abscisic Acid and Sugars. J Hortic 04.
- 654 Chuine I, Bonhomme M, Legave J-M, García de Cortázar-Atauri I, Charrier G, Lacoïnte A, Améglio  
655 T (2016) Can phenological models predict tree phenology accurately in the future? The  
656 unrevealed hurdle of endodormancy break. Glob Chang Biol 22:3444–3460.
- 657 Chuine I, Régnière J (2017) Process-Based Models of Phenology for Plants and Animals. Annu Rev  
658 Ecol Evol Syst 48:159–82.
- 659 Cooke JEK, Eriksson ME, Junttila O (2012) The dynamic nature of bud dormancy in trees:  
660 environmental control and molecular mechanisms. Plant Cell Env 35:1707–1728.
- 661 Donoho CWJ, Walker DR (1957) Effect of Gibberellic Acid on Breaking of Rest Period in Elberta  
662 Peach. Science (80- ) 126:1178–1179.
- 663 Donohue K, Burghardt LT, Runcie D, Bradford KJ, Schmitt J (2015) Applying developmental  
664 threshold models to evolutionary ecology. Trends Ecol Evol 30:66–77.
- 665 Eriksson ME, Hoffman D, Kaduk M, Mauriat M, Moritz T (2015) Transgenic hybrid aspen trees with  
666 increased gibberellin (GA) concentrations suggest that GA acts in parallel with FLOWERING  
667 LOCUS T2 to control shoot elongation. New Phytol 205:1288–1295.
- 668 Fadón E, Herrero M, Rodrigo J (2015) Flower development in sweet cherry framed in the BBCH  
669 scale. Sci Hortic (Amsterdam) 192:141–147.
- 670 Fadón E, Rodrigo J, Herrero M (2018) Is there a specific stage to rest? Morphological changes in  
671 flower primordia in relation to endodormancy in sweet cherry (*Prunus avium* L.). Trees  
672 32:1583–1594.
- 673 Finkelstein R (2013) Abscisic Acid Synthesis and Response. The Arabidopsis Book 11:e0166.
- 674 Gagne JM, Downes BP, Shiu S-H, Durski AM, Vierstra RD (2002) The F-box subunit of the SCF E3  
675 complex is encoded by a diverse superfamily of genes in Arabidopsis. Proc Natl Acad Sci  
676 99:11519–11524.
- 677 Haddad C, Arkoun M, Jamois F, Schwarzenberg A, Yvin JC, Etienne P, Laine P (2018) Silicon  
678 promotes growth of *Brassica napus* L. And delays leaf senescence induced by nitrogen

- 679 starvation. *Front Plant Sci* 9:1–13.
- 680 Hänninen H (1990) Modelling bud dormancy release in trees from cool and temperate regions. *Acta*  
681 *For Fenn* 213:1–47.
- 682 Hao X, Chao WS, Yang Y, Horvath DP (2015) Coordinated expression of *FLOWERING LOCUS T*  
683 and *DORMANCY ASSOCIATED MADS-BOX*-like genes in leafy spurge. *PLoS One* 10:1–18.
- 684 Heide OM, Prestrud AK (2005) Low temperature, but not photoperiod, controls growth cessation and  
685 dormancy induction and release in apple and pear. *Tree Physiol* 25:109–114.
- 686 Hoad G V (1983) Hormonal regulation of fruit-bud formation in fruit trees. *Acta Horti* 149:13–24.
- 687 Ito A, Tuan PA, Saito T, Bai S, Kita M, Moriguchi T (2019) Changes in Phytohormone Content and  
688 Associated Gene Expression Throughout the Stages of Pear (*Pyrus pyrifolia* Nakai) Dormancy.  
689 *Tree Physiol* tpz101
- 690 Jiménez S, Reighard GL, Bielenberg DG (2010) Gene expression of *DAM5* and *DAM6* is suppressed  
691 by chilling temperatures and inversely correlated with bud break rate. *Plant Mol Biol* 73:157–67.
- 692 Jochner S, Caffarra A, Menzel A (2013) Can spatial data substitute temporal data in phenological  
693 modelling? A survey using birch flowering. *Tree Physiol* 33:1256–1268.
- 694 Junttila O, Jensen E (1988) Gibberellins and photoperiodic control of shoot elongation in *Salix*.  
695 *Physiol Plant* 74:371–376.
- 696 El Kayal W, Allen CCG, Ju CJT, Adams E, King-Jones S, Zaharia LI, Abrams SR, Cooke JEK (2011)  
697 Molecular events of apical bud formation in white spruce, *Picea glauca*. *Plant Cell Environ*  
698 34:480–500.
- 699 Khalil-Ur-Rehman M, Sun L, Li CX, Faheem M, Wang W, Tao JM (2017) Comparative RNA-seq  
700 based transcriptomic analysis of bud dormancy in grape. *BMC Plant Biol* 17:1–11.
- 701 Kudoh H (2016) Molecular phenology in plants: In natura systems biology for the comprehensive  
702 understanding of seasonal responses under natural environments. *New Phytol* 210:399–412.
- 703 de la Fuente L, Conesa A, Lloret A, Badenes ML, Ríos G (2015) Genome-wide changes in histone H3  
704 lysine 27 trimethylation associated with bud dormancy release in peach. *Tree Genet Genomes*  
705 11:45.
- 706 Lakkis S, Trotel-Aziz P, Rabenoelina F, Schwarzenberg A, Nguema-Ona E, Clément C, Aziz A  
707 (2019) Strengthening Grapevine Resistance by *Pseudomonas fluorescens* PTA-CT2 Relies on  
708 Distinct Defense Pathways in Susceptible and Partially Resistant Genotypes to Downy Mildew  
709 and Gray Mold Diseases. *Front Plant Sci* 10:1–18.



- 710 Lang G, Early J, Martin G, Darnell R (1987) Endo-, para-, and ecodormancy: physiological  
711 terminology and classification for dormancy research. *Hort Sci* 22:371–377.
- 712 Leida C, Conejero A, Arbona V, Gómez-Cadenas A, Llácer G, Badenes ML, Ríos G (2012) Chilling-  
713 dependent release of seed and bud dormancy in peach associates to common changes in gene  
714 expression. *PLoS One* 7:e35777.
- 715 Leida C, Conesa A, Llácer G, Badenes ML, Ríos G (2012) Histone modifications and expression of  
716 *DAM6* gene in peach are modulated during bud dormancy release in a cultivar-dependent  
717 manner. *New Phytol* 193:67–80.
- 718 Li J, Xu Y, Niu Q, He L, Teng Y, Bai S (2018) Abscisic acid (ABA) promotes the induction and  
719 maintenance of pear (*Pyrus pyrifolia* white pear group) flower bud endodormancy. *Int J Mol Sci*  
720 19
- 721 Liu J, Sherif SM (2019) Hormonal Orchestration of Bud Dormancy Cycle in Deciduous Woody  
722 Perennials. *Front Plant Sci* 10:1–21.
- 723 Love MI, Huber W, Anders S (2014) Moderated estimation of fold change and dispersion for RNA-  
724 seq data with DESeq2. *Genome Biol* 15:1–21.
- 725 Nambara E, Marion-Poll A (2005) Abscisic Acid Biosynthesis and Catabolism. *Annu Rev Plant Biol*  
726 56:165–185.
- 727 Niu Q, Li J, Cai D, Qian M, Jia H, Bai S, Hussain S, Liu G, Teng Y, Zheng X (2015) Dormancy-  
728 associated MADS-box genes and microRNAs jointly control dormancy transition in pear (*Pyrus*  
729 *pyrifolia* white pear group) flower bud. *J Exp Bot* 67:erv454.
- 730 Olsen JE (2010) Light and temperature sensing and signaling in induction of bud dormancy in woody  
731 plants. *Plant Mol Biol* 73:37–47.
- 732 Ophir R, Pang X, Halaly T, Venkateswari J, Lavee S, Galbraith D, Or E (2009) Gene-expression  
733 profiling of grape bud response to two alternative dormancy-release stimuli expose possible links  
734 between impaired mitochondrial activity, hypoxia, ethylene-ABA interplay and cell enlargement.  
735 *Plant Mol Biol* 71:403–423.
- 736 Or E, Belausov E, Popilevsky I, Ben Tal Y (2000) Changes in endogenous ABA level in relation to  
737 the dormancy cycle in grapevines grown in a hot climate. *J Hort Sci Biotechnol* 75:190–194.
- 738 Petterle A, Karlberg A, Bhalerao RP (2013) Daylength mediated control of seasonal growth patterns in  
739 perennial trees. *Curr Opin Plant Biol* 16:301–306.
- 740 Powell LE (1987) The hormonal control of bud and seed dormancy in woody plants. In: Davies P (ed)  
741 *Plant Hormones and Their Role in Plant Growth and Development*. Martinus Nijhoff Publishers,

- 742 Dordrecht, pp 539–552.
- 743 Priest DM, Ambrose SJ, Vaistij FE, Elias L, Higgins GS, Ross ARS, Abrams SR, Bowles DJ (2006)  
744 Use of the glucosyltransferase UGT71B6 to disturb abscisic acid homeostasis in *Arabidopsis*  
745 *thaliana*. *Plant J* 46:492–502.
- 746 Rinne PLH, Welling A, Vahala J, Ripel L, Ruonala R, Kangasjarvi J, van der Schoot C (2011)  
747 Chilling of dormant buds hyperinduces *FLOWERING LOCUS T* and recruits GA-inducible 1,3-  
748 beta-glucanases to reopen signal conduits and release dormancy in *Populus*. *Plant Cell* 23:130–  
749 146.
- 750 Ríos G, Leida C, Conejero A, Badenes ML (2014) Epigenetic regulation of bud dormancy events in  
751 perennial plants. *Front Plant Sci* 5:247.
- 752 Rodríguez-Gacio MDC, Matilla-Vázquez M a, Matilla AJ (2009) Seed dormancy and ABA signaling:  
753 the breakthrough goes on. *Plant Signal Behav* 4:1035–1049.
- 754 Rodriguez A, Sherman W, Scorza R, Wisniewski M, Okie WR (1994) ‘Evergreen’ peach, its  
755 inheritance and dormant behavior. *J Am Soc hort Sci* 119:789–792.
- 756 Rohde A, Bhalerao RP (2007) Plant dormancy in the perennial context. *Trends Plant Sci* 12:217–223.
- 757 Rohde A, Prinsen E, Rycke R De, Engler G, Montagu M Van, Boerjan W (2002) PtABI3 Impinges on  
758 the Growth and Differentiation of Embryonic Leaves during Bud Set in Poplar. *Plant Cell*  
759 14:1885–1901.
- 760 Rohde A, Storme V, Jorge V, Gaudet M, Vitacolonna N, Fabbrini F, Ruttink T, Zaina G, Marron N,  
761 Dillen S, Steenackers M, Sabatti M, Morgante M, Boerjan W, Bastien C (2011) Bud set in  
762 poplar--genetic dissection of a complex trait in natural and hybrid populations. *New Phytol*  
763 189:106–121.
- 764 Roxrud I, Lid SE, Fletcher JC, Schmidt EDL, Opsahl-Sorteberg HG (2007) *GASA4*, one of the 14-  
765 member *Arabidopsis* GASA family of small polypeptides, regulates flowering and seed  
766 development. *Plant Cell Physiol* 48:471–483.
- 767 Ruttink T, Arend M, Morreel K, Storme V, Rombauts S, Fromm J, Bhalerao RP, Boerjan W, Rohde A  
768 (2007) A molecular timetable for apical bud formation and dormancy induction in poplar. *Plant*  
769 *Cell* 19:2370–2390.
- 770 Satake A, Kawagoe T, Saburi Y, Chiba Y, Sakurai G, Kudoh H (2013) Forecasting flowering  
771 phenology under climate warming by modelling the regulatory dynamics of flowering-time  
772 genes. *Nat Commun* 4:2303.
- 773 Shafer N, Monson WG (1958) The Role of Gibberellic Acid in Overcoming Bud Dormancy in

- 774 Perennial Weeds. I. Leafy Spurge (*Euphorbia esulta* L.) and Ironweed (*Vernonia Baldwini*  
775 Torr.). Weeds 6:172–178.
- 776 Shu K, Zhang H, Wang S, Chen M, Wu Y, Tang S, Liu C, Feng Y, Cao X, Xie Q (2013) ABI4  
777 Regulates Primary Seed Dormancy by Regulating the Biogenesis of Abscisic Acid and  
778 Gibberellins in Arabidopsis. PLoS Genet 9
- 779 Shu K, Zhou W, Yang W (2018) APETALA 2-domain-containing transcription factors: focusing on  
780 abscisic acid and gibberellins antagonism. New Phytol 217:977–983.
- 781 Singh RK, Maurya JP, Azeez A, Miskolczi P, Tylewicz S, Stojkovič K, Delhomme N, Busov V,  
782 Bhalerao RP (2018) A genetic network mediating the control of bud break in hybrid aspen. Nat  
783 Commun 9
- 784 Singh RK, Miskolczi P, Maurya JP, Bhalerao RP (2019) A Tree Ortholog of *SHORT VEGETATIVE*  
785 *PHASE* Floral Repressor Mediates Photoperiodic Control of Bud Dormancy. Curr Biol 29:128-  
786 133.e2.
- 787 Singh RK, Svystun T, AlDahmash B, Jönsson AM, Bhalerao RP (2016) Photoperiod- and  
788 temperature-mediated control of growth cessation and dormancy in trees: A molecular  
789 perspective. New Phytol 213:511-524.
- 790 Topham AT, Taylor RE, Yan D, Nambara E, Johnston IG, Bassel GW (2017) Temperature variability  
791 is integrated by a spatially embedded decision-making center to break dormancy in Arabidopsis  
792 seeds. Proc Natl Acad Sci 114:6629–6634.
- 793 Trapnell C, Pachter L, Salzberg SL (2009) TopHat: Discovering splice junctions with RNA-Seq.  
794 Bioinformatics 25:1105–1111.
- 795 Tuan PA, Bai S, Saito T, Ito A, Moriguchi T (2017) Dormancy-Associated MADS-Box (DAM) and  
796 the Abscisic Acid Pathway Regulate Pear Endodormancy Through a Feedback Mechanism. Plant  
797 Cell Physiol 58:1378–1390.
- 798 Tylewicz S, Petterle A, Marttila S, Miskolczi P, Azeez A, Singh RK, Immanen J, Mähler N, Hvidsten  
799 TR, Eklund DM, Bowman JL, Helariutta Y, Bhalerao RP (2018) Photoperiodic control of  
800 seasonal growth is mediated by ABA acting on cell-cell communication. Science (80- ) 360:212–  
801 215.
- 802 Ueguchi-Tanaka M, Nakajima M, Katoh E, Ohmiya H, Asano K, Saji S, Hongyu X, Ashikari M,  
803 Kitano H, Yamaguchi I, Matsuoka M (2007) Molecular Interactions of a Soluble Gibberellin  
804 Receptor, *GID1*, with a Rice *DELLA* Protein, *SLR1*, and Gibberellin. Plant Cell Online  
805 19:2140–2155.

- 806 Ueno S, Klopp C, Leplé JC, Derory J, Noirot C, Léger V, Prince E, Kremer A, Plomion C, Le Provost  
807 G (2013) Transcriptional profiling of bud dormancy induction and release in oak by next-  
808 generation sequencing. *BMC Genomics* 14:236.
- 809 Verde I, Jenkins J, Dondini L, Micali S, Pagliarani G, Vendramin E, Paris R, Aramini V, Gaza L,  
810 Rossini L, Bassi D, Troggio M, Shu S, Grimwood J, Tartarini S, Dettori MT, Schmutz J (2017)  
811 The Peach v2.0 release: high-resolution linkage mapping and deep resequencing improve  
812 chromosome-scale assembly and contiguity. *BMC Genomics* 18:225.
- 813 Vitasse Y, François C, Delpierre N, Dufrêne E, Kremer A, Chuine I, Delzon S (2011) Assessing the  
814 effects of climate change on the phenology of European temperate trees. *Agric For Meteorol*  
815 151:969–980.
- 816 Wagner GP, Kin K, Lynch VJ (2012) Measurement of mRNA abundance using RNA-seq data: RPKM  
817 measure is inconsistent among samples. *Theory Biosci* 131:281–285.
- 818 Wang D, Gao Z, Du P, Xiao W, Tan Q, Chen X, Li L, Gao D (2016) Expression of ABA Metabolism-  
819 Related Genes Suggests Similarities and Differences Between Seed Dormancy and Bud  
820 Dormancy of Peach (*Prunus persica*). *Front Plant Sci* 6:1–17.
- 821 Wen LH, Zhong WJ, Huo XM, Zhuang WB, Ni ZJ, Gao ZH (2016) Expression analysis of ABA- and  
822 GA-related genes during four stages of bud dormancy in Japanese apricot (*Prunus mume* Sieb. et  
823 Zucc). *J Hortic Sci Biotechnol* 91:362–369.
- 824 Weng JK, Ye M, Li B, Noel JP (2016) Co-evolution of Hormone Metabolism and Signaling Networks  
825 Expands Plant Adaptive Plasticity. *Cell* 166:881–893.
- 826 Wilczek AM, Roe JL, Knapp MC, Cooper MD, Lopez-Gallego C, Martin LJ, Muir CD, Sim S, Walker  
827 A, Anderson J, Egan JF, Moyers BT, Petipas R, Giakountis A, Charbit E, Coupland G, Welch  
828 SM, Schmitt J, Franklin Egan J, Moyers BT, Petipas R, Giakountis A, Charbit E, Coupland G,  
829 Welch SM, Schmitt J (2009) Effects of genetic perturbation on seasonal life history plasticity.  
830 *Science* (80- ) 323:930–935.
- 831 Xu ZJ, Nakajima M, Suzuki Y, Yamaguchi I (2002) Cloning and Characterization of the Abscisic  
832 Acid-Specific Glucosyltransferase Gene from Adzuki Bean Seedlings. *Plant Physiol* 129:1285–  
833 1295.
- 834 Yamaguchi S (2008) Gibberellin Metabolism and its Regulation. *Annu Rev Plant Biol* 59:225–251.
- 835 Yamane H, Wada M, Honda C, Matsuura T, Ikeda Y, Hirayama T, Osako Y, Gao-Takai M, Kojima  
836 M, Sakakibara H, Tao R (2019) Overexpression of *Prunus DAM6* inhibits growth, represses bud  
837 break competency of dormant buds and delays bud outgrowth in apple plants. *PLoS One* 14:1–  
838 24.

- 839 Yang Q, Niu Q, Tang Y, Ma Y, Yan X, Li J, Tian J, Bai S, Teng Y (2019) PpyGAST1 is potentially  
840 involved in bud dormancy release by integrating the GA biosynthesis and ABA signaling in  
841 ‘Suli’ pear (*Pyrus pyrifolia* White Pear Group). *Environ Exp Bot* 162:302–312.
- 842 Yue C, Cao H, Hao X, Zeng J, Qian W, Guo Y, Ye N, Yang Y, Wang X (2017) Differential  
843 expression of gibberellin- and abscisic acid-related genes implies their roles in the bud activity-  
844 dormancy transition of tea plants. *Plant Cell Rep* 37:425–441.
- 845 Zentella R, Zhang Z-L, Park M, Thomas SG, Endo A, Murase K, Fleet CM, Jikumaru Y, Nambara E,  
846 Kamiya Y, Sun T (2007) Global Analysis of DELLA Direct Targets in Early Gibberellin  
847 Signaling in *Arabidopsis*. *Plant Cell* 19:3037–3057.
- 848 Zhang X, An L, Nguyen TH, Liang H, Wang R, Liu X, Li T, Qi Y, Yu F (2015) The cloning and  
849 functional characterization of peach *CONSTANS* and *FLOWERING LOCUS T* homologous genes  
850 *PpCO* and *PpFT*. *PLoS One* 10:1–16.
- 851 Zhang Z, Zhuo X, Zhao K, Zheng T, Han Y, Yuan C, Zhang Q (2018) Transcriptome Profiles Reveal  
852 the Crucial Roles of Hormone and Sugar in the Bud Dormancy of *Prunus mume*. *Sci Rep* 8:1–15.
- 853 Zhao K, Zhou Y, Ahmad S, Yong X, Xie X, Han Y, Li Y, Sun L, Zhang Q (2018) PmCBFs  
854 synthetically affect PmDAM6 by alternative promoter binding and protein complexes towards  
855 the dormancy of bud for *Prunus mume*. *Sci Rep* 8:4527.
- 856 Zheng C, Acheampong AK, Shi Z, Halaly T, Kamiya Y, Ophir R, Galbraith DW, Or E (2018) Distinct  
857 gibberellin functions during and after grapevine bud dormancy release. *J Exp Bot* 69:1635–1648.
- 858 Zheng C, Acheampong AK, Shi Z, Mugzech A, Halaly-Basha T, Sun Y, Colova V, Mosquna A, Ophir  
859 R, Galbraith DW, Or E (2018) Abscisic Acid Catabolism Enhances Dormancy Release of  
860 Grapevine Buds. *Plant Cell Environ* 41:2490–2503.
- 861 Zheng C, Halaly T, Acheampong AK, Takebayashi Y, Jikumaru Y, Kamiya Y, Or E (2015) Abscisic  
862 acid (ABA) regulates grape bud dormancy, and dormancy release stimuli may act through  
863 modification of ABA metabolism. *J Exp Bot* 66:1527–1542.
- 864 Zhong W, Gao Z, Zhuang W, Shi T, Zhang Z, Ni Z (2013) Genome-wide expression profiles of  
865 seasonal bud dormancy at four critical stages in Japanese apricot. *Plant Mol Biol* 83:247–64.
- 866 Zhong C, Xu H, Ye S, Wang S, Li L, Zhang S, Wang X (2015) AtGASA6 Serves as an Integrator of  
867 Gibberellin-, Abscisic Acid- and Glucose-Signaling during Seed Germination in *Arabidopsis*.  
868 *Plant Physiol* 169:pp.00858.2015.
- 869 Zhu Y, Li Y, Xin D, Chen W, Shao X, Wang Y, Guo W (2015) RNA-Seq-based transcriptome  
870 analysis of dormant flower buds of Chinese cherry (*Prunus pseudocerasus*). *Gene* 555:362–376.

871 Zhuang W, Gao Z, Wang L, Zhong W, Ni Z, Zhang Z (2013) Comparative proteomic and  
872 transcriptomic approaches to address the active role of GA4 in Japanese apricot flower bud  
873 dormancy release. *J Exp Bot* 64:4953–4966.

874

875
